# Supplementary material
Source: publisher figshare collection journal article supplement (https://acs.figshare.com/ndownloader/files/9711973)
Supplement: Supplementary file 1 [file 9711973]

data_General
＝＝＝＝＝
# start Validation Reply Form
_vrf_PLAT097_B3
;
PROBLEM: Large Reported Max. (Positive) Residual Density 1.06 eA-3
RESPONSE: see _publ_section_exptl_refinement
;
_vrf_PLAT230_B3
;
PROBLEM: Hirshfeld Test Diff for C28 -- C36 .. 7.5 s.u.
RESPONSE: see _publ_section_exptl_refinement
;
_vrf_PLAT410_B3
;
PROBLEM: Short Intra H...H Contact H37 .. H43B . 1.88 Ang. 
RESPONSE: see _publ_section_exptl_refinement
;
_publ_section_exptl_refinement
;
These alerts are caused by the crystal disordering along the b-axis.
Since occupancy of the minor components is low (ca. 15%), the central B3N3-coronene structure could not be refined.
;
# end Validation Reply Form
＝＝＝＝＝
_audit_creation_date                    2016-12-28
_audit_creation_method                 'by Yadokari-XG 2009'
#=============================================================
# SUBMISSION DETAILS

_publ_contact_author_name              'Takuji Hatakeyama'
_publ_contact_author_address
;
    School of Science and Technology, Kwansei Gakuin University, 2-1 Gakuen, Sanda, 
    Hyogo 669-1337, Japan. 
;
_publ_contact_author_email             'hatake@kwansei.ac.jp'
_publ_contact_author_fax               '+81-79-565-8734'
_publ_contact_author_phone             '+81-79-565-8734'
_publ_requested_journal                'J. Am. Chem. Soc.'  

#==============================================================================
# TITLE AND AUTHOR LIST

_publ_section_title
;
One-shot Multiple Borylation toward BN-Doped Nanographenes 
;
loop_
_publ_author_name
_publ_author_footnote
_publ_author_address
'Kohei Matsui'
'Susumu Oda'
'Kazuki Yoshiura'
'Kiichi Nakajima'
'Nobuhiro Yasuda'
;

;
;
    School of Science and Technology, Kwansei Gakuin University,
    2-1 Gakuen, Sanda, Hyogo 669-1337, Japan. 
;
#==============================================================================
# TEXT

_publ_section_abstract
;

;

_publ_section_references
;
    Yadokari-XG 2009 revision 814
    iremc Yadokari project, Japan.


    Maria Cristina Burla, Rocco Caliandro, Benedetta Carrozzini, 
    Giovanni Luca Cascarano, Carmelo  Giacovazzo, Mariarosaria Mallamo, 
    Annamaria Mazzone, Giampiero Polidori  (2014)
    SIR2014
;

#============================================================================== 
 
data_B3
 
_audit_creation_method            'SHELXL-2014/7'
_shelx_SHELXL_version_number      '2014/7'
_chemical_name_systematic         ?
_chemical_name_common             ?
_chemical_melting_point           ?
_chemical_formula_moiety          'C48 H36 B3 N3'
_chemical_formula_sum
 'C48 H36 B3 N3' 
_chemical_formula_weight          687.23

loop_
 _atom_type_symbol
 _atom_type_description
 _atom_type_scat_dispersion_real
 _atom_type_scat_dispersion_imag
 _atom_type_scat_source
 'C'  'C'   0.0041   0.0020
 'International Tables Vol C Tables 4.2.6.8 and 6.1.1.4'
 'H'  'H'   0.0000   0.0000
 'International Tables Vol C Tables 4.2.6.8 and 6.1.1.4'
 'B'  'B'   0.0020   0.0009
 'International Tables Vol C Tables 4.2.6.8 and 6.1.1.4'
 'N'  'N'   0.0078   0.0041
 'International Tables Vol C Tables 4.2.6.8 and 6.1.1.4'
 
_space_group_crystal_system       monoclinic
_space_group_IT_number            15
_space_group_name_H-M_alt         'C 2/c'
_space_group_name_Hall            '-C 2yc'
 
_shelx_space_group_comment
;
The symmetry employed for this shelxl refinement is uniquely defined
by the following loop, which should always be used as a source of
symmetry information in preference to the above space-group names.
They are only intended as comments.
;
 
loop_
 _space_group_symop_operation_xyz
 'x, y, z'
 '-x, y, -z+1/2'
 'x+1/2, y+1/2, z'
 '-x+1/2, y+1/2, -z+1/2'
 '-x, -y, -z'
 'x, -y, z-1/2'
 '-x+1/2, -y+1/2, -z'
 'x+1/2, -y+1/2, z-1/2'
 
_cell_length_a                    11.4208(7)
_cell_length_b                    16.0209(9)
_cell_length_c                    18.8012(11)
_cell_angle_alpha                 90
_cell_angle_beta                  94.537(4)
_cell_angle_gamma                 90
_cell_volume                      3429.3(3)
_cell_formula_units_Z             4
_cell_measurement_temperature     100(2)
_cell_measurement_reflns_used     8944
_cell_measurement_theta_min       2.415
_cell_measurement_theta_max       27.498
 
_exptl_crystal_description        plate
_exptl_crystal_colour             yellow
_exptl_crystal_density_meas       ?
_exptl_crystal_density_method     ?
_exptl_crystal_density_diffrn     1.331          
_exptl_crystal_F_000              1440
_exptl_transmission_factor_min    ?
_exptl_transmission_factor_max    ?
_exptl_crystal_size_max           0.300
_exptl_crystal_size_mid           0.200
_exptl_crystal_size_min           0.050
_exptl_absorpt_coefficient_mu     0.092
_shelx_estimated_absorpt_T_min    0.973
_shelx_estimated_absorpt_T_max    0.995
_exptl_absorpt_correction_type    multi-scan
_exptl_absorpt_correction_T_min   0.973
_exptl_absorpt_correction_T_max   0.995
_exptl_absorpt_process_details    'ABSCOR'
_exptl_absorpt_special_details    ?
_diffrn_ambient_temperature       100(2)
_diffrn_radiation_wavelength      0.78207
_diffrn_radiation_type            synchrotron
_diffrn_source                    'Synchrotron radiation SPring-8 BL40XU'
_diffrn_measurement_device_type   'Rigaku Saturn724'
_diffrn_measurement_method        'Oscillation Photograph'
_diffrn_detector_area_resol_mean  29
_diffrn_reflns_number             8944
_diffrn_reflns_av_unetI/netI      0.0794
_diffrn_reflns_av_R_equivalents   0.0703
_diffrn_reflns_limit_h_min        -13
_diffrn_reflns_limit_h_max        13
_diffrn_reflns_limit_k_min        -18
_diffrn_reflns_limit_k_max        18
_diffrn_reflns_limit_l_min        -21
_diffrn_reflns_limit_l_max        22
_diffrn_reflns_theta_min          2.415
_diffrn_reflns_theta_max          27.498
_diffrn_reflns_theta_full         27.498
_diffrn_measured_fraction_theta_max   0.990
_diffrn_measured_fraction_theta_full  0.990
_diffrn_reflns_Laue_measured_fraction_max    0.990
_diffrn_reflns_Laue_measured_fraction_full   0.990
_diffrn_reflns_point_group_measured_fraction_max   0.990
_diffrn_reflns_point_group_measured_fraction_full  0.990
_reflns_number_total              2936
_reflns_number_gt                 1881
_reflns_threshold_expression      'I > 2\s(I)'
_reflns_Friedel_coverage          0.000
_reflns_Friedel_fraction_max      .
_reflns_Friedel_fraction_full     .
 
_reflns_special_details
;
 Reflections were merged by SHELXL according to the crystal
 class for the calculation of statistics and refinement.
 
 _reflns_Friedel_fraction is defined as the number of unique
 Friedel pairs measured divided by the number that would be
 possible theoretically, ignoring centric projections and
 systematic absences.
;
 
_computing_data_collection        'RIGAKU RAPID AUTO'
_computing_cell_refinement        'RIGAKU RAPID AUTO'
_computing_data_reduction         'RIGAKU RAPID AUTO'
_computing_structure_solution     ?
_computing_structure_refinement 'SHELXL-2014/7 (Sheldrick, 2014)'
_computing_molecular_graphics     ?
_computing_publication_material   ?
_refine_special_details           ?
_refine_ls_structure_factor_coef  Fsqd
_refine_ls_matrix_type            full
_refine_ls_weighting_scheme       calc
_refine_ls_weighting_details
'w=1/[\s^2^(Fo^2^)+(0.2000P)^2^] where P=(Fo^2^+2Fc^2^)/3'
_atom_sites_solution_primary      ?
_atom_sites_solution_secondary    ?
_atom_sites_solution_hydrogens    geom
_refine_ls_hydrogen_treatment     constr
_refine_ls_extinction_method      none
_refine_ls_extinction_coef        .
_refine_ls_number_reflns          2936
_refine_ls_number_parameters      260
_refine_ls_number_restraints      0
_refine_ls_R_factor_all           0.1680
_refine_ls_R_factor_gt            0.1294
_refine_ls_wR_factor_ref          0.3546
_refine_ls_wR_factor_gt           0.3227
_refine_ls_goodness_of_fit_ref    1.300
_refine_ls_restrained_S_all       1.300
_refine_ls_shift/su_max           0.000
_refine_ls_shift/su_mean          0.000
 
loop_
 _atom_site_label
 _atom_site_type_symbol
 _atom_site_fract_x
 _atom_site_fract_y
 _atom_site_fract_z
 _atom_site_U_iso_or_equiv
 _atom_site_adp_type
 _atom_site_occupancy
 _atom_site_site_symmetry_order  
 _atom_site_calc_flag
 _atom_site_refinement_flags_posn
 _atom_site_refinement_flags_adp
 _atom_site_refinement_flags_occupancy
 _atom_site_disorder_assembly
 _atom_site_disorder_group
C29A C 0.4156(6) 0.2495(4) 0.5698(3) 0.0294(12) Uani 0.869(4) 1 d . . P A 1
C39A C 0.4147(4) 0.3192(3) 0.4325(2) 0.0285(12) Uani 0.869(4) 1 d . . P A 1
C34A C 0.4091(5) 0.2330(3) 0.4393(2) 0.0286(13) Uani 0.869(4) 1 d . . P A 1
C42A C 0.4112(4) 0.2004(3) 0.5091(2) 0.0323(12) Uani 0.869(4) 1 d . . P A 1
H42A H 0.4095 0.1415 0.5147 0.039 Uiso 0.869(4) 1 calc R U P A 1
C43A C 0.4274(4) 0.3695(3) 0.4937(2) 0.0319(12) Uani 0.869(4) 1 d . . P A 1
H43A H 0.4359 0.4282 0.4888 0.038 Uiso 0.869(4) 1 calc R U P A 1
C45A C 0.4277(4) 0.3355(3) 0.5598(2) 0.0351(13) Uani 0.869(4) 1 d . . P A 1
H45A H 0.4363 0.3709 0.6004 0.042 Uiso 0.869(4) 1 calc R U P A 1
C54A C 0.4123(5) 0.2137(3) 0.6428(3) 0.0418(14) Uani 0.869(4) 1 d . . P A 1
H54A H 0.3315 0.2145 0.6568 0.063 Uiso 0.869(4) 1 calc R U P A 1
H54B H 0.4625 0.2469 0.6767 0.063 Uiso 0.869(4) 1 calc R U P A 1
H54C H 0.4409 0.1560 0.6430 0.063 Uiso 0.869(4) 1 calc R U P A 1
C29B C 0.428(3) 0.2523(14) 0.5684(9) 0.0294(12) Uani 0.131(4) 1 d G . P A 2
C42B C 0.412(3) 0.3044(11) 0.5094(12) 0.0323(12) Uani 0.131(4) 1 d G . P A 2
H42B H 0.4042 0.3629 0.5157 0.039 Uiso 0.131(4) 1 calc R U P A 2
C34B C 0.407(2) 0.2709(14) 0.4410(10) 0.0286(13) Uani 0.131(4) 1 d G . P A 2
C39B C 0.418(2) 0.1854(14) 0.4317(8) 0.0285(12) Uani 0.131(4) 1 d G . P A 2
C43B C 0.4349(19) 0.1332(11) 0.4907(10) 0.0319(12) Uani 0.131(4) 1 d G . P A 2
H43B H 0.4428 0.0747 0.4843 0.038 Uiso 0.131(4) 1 calc R U P A 2
C45B C 0.440(2) 0.1667(13) 0.5591(8) 0.0351(13) Uani 0.131(4) 1 d G . P A 2
H45B H 0.4512 0.1311 0.5995 0.042 Uiso 0.131(4) 1 calc R U P A 2
C54B C 0.414(3) 0.295(2) 0.6429(17) 0.0418(14) Uani 0.131(4) 1 d . . P A 2
H54D H 0.4311 0.3547 0.6397 0.063 Uiso 0.131(4) 1 calc R U P A 2
H54E H 0.4693 0.2694 0.6792 0.063 Uiso 0.131(4) 1 calc R U P A 2
H54F H 0.3337 0.2871 0.6561 0.063 Uiso 0.131(4) 1 calc R U P A 2
C53A C 0.2665(5) 0.6994(3) 0.3400(3) 0.0542(15) Uani 1 1 d . . . A 1
H53A H 0.3280 0.7313 0.3672 0.081 Uiso 1 1 calc R U . A 1
H53B H 0.1918 0.7068 0.3616 0.081 Uiso 1 1 calc R U . A 1
H53C H 0.2584 0.7193 0.2906 0.081 Uiso 1 1 calc R U . A 1
N2 N 0.5000 0.0974(3) 0.2500 0.0389(14) Uani 1 2 d S T P A 1
N1 N 0.4141(3) 0.3560(2) 0.36389(17) 0.0390(10) Uani 1 1 d . . . A 1
C28 C 0.4575(4) 0.2251(3) 0.3086(2) 0.0391(13) Uani 1 1 d . . . A 1
C30 C 0.3892(4) 0.0845(3) 0.3576(2) 0.0356(11) Uani 1 1 d . . . A 1
C32 C 0.5000 0.1812(4) 0.2500 0.0356(15) Uani 1 2 d S T P A 1
C33 C 0.2903(4) 0.4714(3) 0.3948(2) 0.0391(12) Uani 1 1 d . . . A 1
H33 H 0.2566 0.4361 0.4283 0.047 Uiso 1 1 calc R U . A 1
C35 C 0.3771(4) 0.4403(3) 0.3547(2) 0.0337(11) Uani 1 1 d . . . A 1
C36 C 0.4571(4) 0.3118(3) 0.3068(2) 0.0344(11) Uani 1 1 d . . . A 1
C37 C 0.3152(4) 0.0370(2) 0.3981(2) 0.0364(12) Uani 1 1 d . . . A 1
H37 H 0.2901 0.0606 0.4406 0.044 Uiso 1 1 calc R U . A 1
C38 C 0.4218(4) 0.4926(3) 0.3023(2) 0.0436(13) Uani 1 1 d . . . A 1
C95 C 0.4263(4) 0.0500(3) 0.2946(2) 0.0398(12) Uani 1 1 d . . . A 1
C41 C 0.3832(4) -0.0257(3) 0.2713(3) 0.0467(13) Uani 1 1 d . . . A 1
H41 H 0.4021 -0.0465 0.2263 0.056 Uiso 1 1 calc R U . A 1
C44 C 0.2775(4) -0.0420(3) 0.3791(2) 0.0416(12) Uani 1 1 d . . . A 1
B1 B 0.4175(4) 0.1749(4) 0.3710(2) 0.0360(13) Uani 1 1 d . . . A 1
C47 C 0.2518(5) 0.5532(3) 0.3871(2) 0.0428(13) Uani 1 1 d . . . A 1
H47 H 0.1905 0.5717 0.4146 0.051 Uiso 1 1 calc R U . A 1
C48 C 0.2987(4) 0.6087(3) 0.3412(3) 0.0461(13) Uani 1 1 d . . . A 1
C49 C 0.3765(5) 0.5767(3) 0.2987(2) 0.0481(14) Uani 1 1 d . . . A 1
H49 H 0.4041 0.6124 0.2633 0.058 Uiso 1 1 calc R U . A 1
C50 C 0.3133(5) -0.0716(3) 0.3119(2) 0.0499(14) Uani 1 1 d . . . A 1
H50 H 0.2873 -0.1250 0.2953 0.060 Uiso 1 1 calc R U . A 1
B2 B 0.5000 0.4529(5) 0.2500 0.0430(19) Uani 1 2 d S T P A 1
C52 C 0.2049(5) -0.0934(3) 0.4228(3) 0.0604(16) Uani 1 1 d . . . A 1
H52A H 0.2544 -0.1352 0.4487 0.091 Uiso 1 1 calc R U . A 1
H52B H 0.1440 -0.1216 0.3920 0.091 Uiso 1 1 calc R U . A 1
H52C H 0.1678 -0.0579 0.4570 0.091 Uiso 1 1 calc R U . A 1
C67 C 0.5000 0.3595(5) 0.2500 0.0397(17) Uani 1 2 d S T P A 1
 
loop_
 _atom_site_aniso_label
 _atom_site_aniso_U_11
 _atom_site_aniso_U_22
 _atom_site_aniso_U_33
 _atom_site_aniso_U_23
 _atom_site_aniso_U_13
 _atom_site_aniso_U_12
C29A 0.028(3) 0.042(3) 0.019(2) 0.0016(16) 0.0106(18) -0.0002(18)
C39A 0.039(3) 0.029(3) 0.018(2) -0.0002(18) 0.010(2) -0.003(2)
C34A 0.033(3) 0.036(3) 0.018(2) -0.003(2) 0.0094(19) -0.003(2)
C42A 0.045(3) 0.032(3) 0.021(2) 0.0063(19) 0.010(2) -0.003(2)
C43A 0.040(3) 0.030(3) 0.028(2) -0.0013(19) 0.011(2) -0.004(2)
C45A 0.045(3) 0.042(3) 0.019(2) -0.008(2) 0.008(2) -0.003(2)
C54A 0.053(4) 0.048(3) 0.024(3) 0.003(2) 0.004(2) -0.009(3)
C29B 0.028(3) 0.042(3) 0.019(2) 0.0016(16) 0.0106(18) -0.0002(18)
C42B 0.045(3) 0.032(3) 0.021(2) 0.0063(19) 0.010(2) -0.003(2)
C34B 0.033(3) 0.036(3) 0.018(2) -0.003(2) 0.0094(19) -0.003(2)
C39B 0.039(3) 0.029(3) 0.018(2) -0.0002(18) 0.010(2) -0.003(2)
C43B 0.040(3) 0.030(3) 0.028(2) -0.0013(19) 0.011(2) -0.004(2)
C45B 0.045(3) 0.042(3) 0.019(2) -0.008(2) 0.008(2) -0.003(2)
C54B 0.053(4) 0.048(3) 0.024(3) 0.003(2) 0.004(2) -0.009(3)
C53A 0.071(4) 0.041(3) 0.052(3) -0.003(2) 0.008(3) 0.017(3)
N2 0.041(3) 0.057(4) 0.020(3) 0.000 0.014(2) 0.000
N1 0.046(2) 0.054(3) 0.0193(18) -0.0076(15) 0.0131(16) 0.0009(18)
C28 0.027(2) 0.075(4) 0.016(2) 0.004(2) 0.0076(18) -0.005(2)
C30 0.033(2) 0.057(3) 0.018(2) 0.0049(18) 0.0100(18) 0.011(2)
C32 0.043(4) 0.045(4) 0.020(3) 0.000 0.012(3) 0.000
C33 0.063(3) 0.036(3) 0.021(2) -0.0045(17) 0.016(2) -0.005(2)
C35 0.044(3) 0.038(3) 0.021(2) -0.0058(18) 0.0107(18) -0.003(2)
C36 0.041(3) 0.045(3) 0.018(2) 0.0000(17) 0.0087(18) -0.001(2)
C37 0.063(3) 0.027(2) 0.022(2) 0.0013(17) 0.018(2) 0.001(2)
C38 0.046(3) 0.055(3) 0.031(2) -0.001(2) 0.010(2) -0.008(2)
C95 0.043(3) 0.049(3) 0.030(2) -0.008(2) 0.013(2) 0.000(2)
C41 0.059(3) 0.039(3) 0.045(3) -0.001(2) 0.020(3) 0.004(2)
C44 0.056(3) 0.036(3) 0.033(2) 0.0045(19) 0.004(2) 0.000(2)
B1 0.034(3) 0.061(4) 0.015(2) 0.012(2) 0.009(2) 0.001(2)
C47 0.061(3) 0.038(3) 0.029(2) -0.0032(19) 0.004(2) 0.002(2)
C48 0.053(3) 0.040(3) 0.045(3) 0.002(2) 0.006(2) -0.001(2)
C49 0.078(4) 0.034(3) 0.032(2) 0.007(2) 0.003(2) 0.005(2)
C50 0.079(4) 0.031(3) 0.040(3) -0.006(2) 0.002(3) -0.003(2)
B2 0.043(5) 0.061(5) 0.025(4) 0.000 0.006(3) 0.000
C52 0.078(4) 0.057(4) 0.050(3) -0.007(2) 0.027(3) -0.016(3)
C67 0.023(3) 0.086(5) 0.011(3) 0.000 0.009(2) 0.000
 
_geom_special_details
;
 All esds (except the esd in the dihedral angle between two l.s. planes)
 are estimated using the full covariance matrix.  The cell esds are taken
 into account individually in the estimation of esds in distances, angles
 and torsion angles; correlations between esds in cell parameters are only
 used when they are defined by crystal symmetry.  An approximate (isotropic)
 treatment of cell esds is used for estimating esds involving l.s. planes.
;
 
loop_
 _geom_bond_atom_site_label_1
 _geom_bond_atom_site_label_2
 _geom_bond_distance
 _geom_bond_site_symmetry_2
 _geom_bond_publ_flag
C29A C42A 1.383(7) . ?
C29A C45A 1.399(7) . ?
C29A C54A 1.492(7) . ?
C39A C34A 1.389(7) . ?
C39A C43A 1.403(6) . ?
C39A N1 1.417(5) . ?
C34A C42A 1.410(6) . ?
C34A B1 1.596(7) . ?
C43A C45A 1.358(6) . ?
C29B C42B 1.3900 . ?
C29B C45B 1.3900 . ?
C29B C54B 1.58(4) . ?
C42B C34B 1.3900 . ?
C34B C39B 1.3900 . ?
C39B C43B 1.3900 . ?
C43B C45B 1.3900 . ?
C53A C48 1.498(6) . ?
N2 C32 1.342(8) . ?
N2 C95 1.450(5) . ?
N2 C95 1.450(5) 2_655 ?
N1 C36 1.406(5) . ?
N1 C35 1.421(6) . ?
C28 C36 1.389(7) . ?
C28 C32 1.424(5) . ?
C28 B1 1.522(6) . ?
C30 C95 1.403(6) . ?
C30 C37 1.405(6) . ?
C30 B1 1.500(7) . ?
C32 C28 1.424(5) 2_655 ?
C33 C35 1.385(6) . ?
C33 C47 1.386(6) . ?
C35 C38 1.419(6) . ?
C36 C67 1.431(6) . ?
C37 C44 1.374(6) . ?
C38 C49 1.443(6) . ?
C38 B2 1.519(6) . ?
C95 C41 1.369(6) . ?
C41 C50 1.363(6) . ?
C44 C50 1.439(6) . ?
C44 C52 1.466(6) . ?
C47 C48 1.377(6) . ?
C48 C49 1.342(7) . ?
B2 C67 1.496(11) . ?
B2 C38 1.519(6) 2_655 ?
C67 C36 1.431(6) 2_655 ?
 
loop_
 _geom_angle_atom_site_label_1
 _geom_angle_atom_site_label_2
 _geom_angle_atom_site_label_3
 _geom_angle
 _geom_angle_site_symmetry_1
 _geom_angle_site_symmetry_3
 _geom_angle_publ_flag
C42A C29A C45A 116.6(5) . . ?
C42A C29A C54A 122.6(5) . . ?
C45A C29A C54A 120.8(4) . . ?
C34A C39A C43A 119.9(4) . . ?
C34A C39A N1 120.0(4) . . ?
C43A C39A N1 120.0(4) . . ?
C39A C34A C42A 117.2(4) . . ?
C39A C34A B1 120.0(4) . . ?
C42A C34A B1 122.3(4) . . ?
C29A C42A C34A 123.6(5) . . ?
C45A C43A C39A 120.9(4) . . ?
C43A C45A C29A 121.6(4) . . ?
C42B C29B C45B 120.0 . . ?
C42B C29B C54B 115.6(19) . . ?
C45B C29B C54B 123.8(19) . . ?
C34B C42B C29B 120.0 . . ?
C42B C34B C39B 120.0 . . ?
C43B C39B C34B 120.0 . . ?
C39B C43B C45B 120.0 . . ?
C43B C45B C29B 120.0 . . ?
C32 N2 C95 121.6(3) . . ?
C32 N2 C95 121.6(3) . 2_655 ?
C95 N2 C95 116.8(5) . 2_655 ?
C36 N1 C39A 120.5(4) . . ?
C36 N1 C35 120.2(3) . . ?
C39A N1 C35 119.1(3) . . ?
C36 C28 C32 118.4(4) . . ?
C36 C28 B1 123.1(4) . . ?
C32 C28 B1 118.4(5) . . ?
C95 C30 C37 118.6(4) . . ?
C95 C30 B1 116.5(4) . . ?
C37 C30 B1 124.3(4) . . ?
N2 C32 C28 119.6(3) . . ?
N2 C32 C28 119.6(3) . 2_655 ?
C28 C32 C28 120.8(6) . 2_655 ?
C35 C33 C47 121.2(4) . . ?
C33 C35 C38 118.6(4) . . ?
C33 C35 N1 119.6(4) . . ?
C38 C35 N1 121.8(4) . . ?
C28 C36 N1 119.0(3) . . ?
C28 C36 C67 123.4(4) . . ?
N1 C36 C67 117.5(5) . . ?
C44 C37 C30 123.3(4) . . ?
C35 C38 C49 115.9(4) . . ?
C35 C38 B2 117.6(5) . . ?
C49 C38 B2 126.0(4) . . ?
C41 C95 C30 119.7(4) . . ?
C41 C95 N2 119.3(4) . . ?
C30 C95 N2 120.7(4) . . ?
C50 C41 C95 120.7(4) . . ?
C37 C44 C50 115.3(4) . . ?
C37 C44 C52 123.5(4) . . ?
C50 C44 C52 121.2(4) . . ?
C30 B1 C28 117.1(4) . . ?
C30 B1 C34A 132.2(4) . . ?
C28 B1 C34A 110.6(4) . . ?
C48 C47 C33 122.7(5) . . ?
C49 C48 C47 115.7(4) . . ?
C49 C48 C53A 122.4(4) . . ?
C47 C48 C53A 121.8(5) . . ?
C48 C49 C38 125.5(4) . . ?
C41 C50 C44 122.2(4) . . ?
C67 B2 C38 114.8(3) . 2_655 ?
C67 B2 C38 114.8(3) . . ?
C38 B2 C38 130.5(7) 2_655 . ?
C36 C67 C36 115.5(6) 2_655 . ?
C36 C67 B2 122.3(3) 2_655 . ?
C36 C67 B2 122.3(3) . . ?
 
loop_
 _geom_torsion_atom_site_label_1
 _geom_torsion_atom_site_label_2
 _geom_torsion_atom_site_label_3
 _geom_torsion_atom_site_label_4
 _geom_torsion
 _geom_torsion_site_symmetry_1
 _geom_torsion_site_symmetry_2
 _geom_torsion_site_symmetry_3
 _geom_torsion_site_symmetry_4
 _geom_torsion_publ_flag
C43A C39A C34A C42A 2.9(7) . . . . ?
N1 C39A C34A C42A 179.4(4) . . . . ?
C43A C39A C34A B1 -169.2(4) . . . . ?
N1 C39A C34A B1 7.3(7) . . . . ?
C45A C29A C42A C34A -5.1(9) . . . . ?
C54A C29A C42A C34A 177.2(5) . . . . ?
C39A C34A C42A C29A 1.6(8) . . . . ?
B1 C34A C42A C29A 173.5(5) . . . . ?
C34A C39A C43A C45A -3.8(7) . . . . ?
N1 C39A C43A C45A 179.7(4) . . . . ?
C39A C43A C45A C29A 0.1(8) . . . . ?
C42A C29A C45A C43A 4.2(8) . . . . ?
C54A C29A C45A C43A -178.1(5) . . . . ?
C45B C29B C42B C34B 0.0 . . . . ?
C54B C29B C42B C34B -171(3) . . . . ?
C29B C42B C34B C39B 0.0 . . . . ?
C42B C34B C39B C43B 0.0 . . . . ?
C34B C39B C43B C45B 0.0 . . . . ?
C39B C43B C45B C29B 0.0 . . . . ?
C42B C29B C45B C43B 0.0 . . . . ?
C54B C29B C45B C43B 171(3) . . . . ?
C34A C39A N1 C36 -27.2(6) . . . . ?
C43A C39A N1 C36 149.3(4) . . . . ?
C34A C39A N1 C35 157.2(4) . . . . ?
C43A C39A N1 C35 -26.3(6) . . . . ?
C95 N2 C32 C28 19.8(3) . . . . ?
C95 N2 C32 C28 -160.2(3) 2_655 . . . ?
C95 N2 C32 C28 -160.2(3) . . . 2_655 ?
C95 N2 C32 C28 19.8(3) 2_655 . . 2_655 ?
C36 C28 C32 N2 -179.2(3) . . . . ?
B1 C28 C32 N2 2.3(4) . . . . ?
C36 C28 C32 C28 0.8(3) . . . 2_655 ?
B1 C28 C32 C28 -177.7(4) . . . 2_655 ?
C47 C33 C35 C38 -3.4(7) . . . . ?
C47 C33 C35 N1 -179.8(4) . . . . ?
C36 N1 C35 C33 150.9(4) . . . . ?
C39A N1 C35 C33 -33.5(6) . . . . ?
C36 N1 C35 C38 -25.3(6) . . . . ?
C39A N1 C35 C38 150.3(4) . . . . ?
C32 C28 C36 N1 179.2(3) . . . . ?
B1 C28 C36 N1 -2.3(6) . . . . ?
C32 C28 C36 C67 -1.7(6) . . . . ?
B1 C28 C36 C67 176.8(4) . . . . ?
C39A N1 C36 C28 24.7(6) . . . . ?
C35 N1 C36 C28 -159.8(4) . . . . ?
C39A N1 C36 C67 -154.4(4) . . . . ?
C35 N1 C36 C67 21.1(5) . . . . ?
C95 C30 C37 C44 0.2(7) . . . . ?
B1 C30 C37 C44 170.6(4) . . . . ?
C33 C35 C38 C49 3.6(6) . . . . ?
N1 C35 C38 C49 179.9(4) . . . . ?
C33 C35 C38 B2 -169.2(4) . . . . ?
N1 C35 C38 B2 7.1(6) . . . . ?
C37 C30 C95 C41 4.8(7) . . . . ?
B1 C30 C95 C41 -166.3(4) . . . . ?
C37 C30 C95 N2 178.3(4) . . . . ?
B1 C30 C95 N2 7.1(6) . . . . ?
C32 N2 C95 C41 148.0(4) . . . . ?
C95 N2 C95 C41 -32.0(4) 2_655 . . . ?
C32 N2 C95 C30 -25.4(5) . . . . ?
C95 N2 C95 C30 154.6(5) 2_655 . . . ?
C30 C95 C41 C50 -6.2(7) . . . . ?
N2 C95 C41 C50 -179.7(4) . . . . ?
C30 C37 C44 C50 -3.6(7) . . . . ?
C30 C37 C44 C52 177.0(5) . . . . ?
C95 C30 B1 C28 13.6(6) . . . . ?
C37 C30 B1 C28 -157.0(4) . . . . ?
C95 C30 B1 C34A -169.4(5) . . . . ?
C37 C30 B1 C34A 20.0(8) . . . . ?
C36 C28 B1 C30 162.7(4) . . . . ?
C32 C28 B1 C30 -18.9(6) . . . . ?
C36 C28 B1 C34A -15.0(6) . . . . ?
C32 C28 B1 C34A 163.5(3) . . . . ?
C39A C34A B1 C30 -164.8(5) . . . . ?
C42A C34A B1 C30 23.4(8) . . . . ?
C39A C34A B1 C28 12.4(6) . . . . ?
C42A C34A B1 C28 -159.4(5) . . . . ?
C35 C33 C47 C48 -1.8(7) . . . . ?
C33 C47 C48 C49 6.4(7) . . . . ?
C33 C47 C48 C53A -172.4(5) . . . . ?
C47 C48 C49 C38 -6.2(8) . . . . ?
C53A C48 C49 C38 172.6(5) . . . . ?
C35 C38 C49 C48 1.3(7) . . . . ?
B2 C38 C49 C48 173.4(4) . . . . ?
C95 C41 C50 C44 2.6(8) . . . . ?
C37 C44 C50 C41 2.3(7) . . . . ?
C52 C44 C50 C41 -178.3(5) . . . . ?
C35 C38 B2 C67 12.6(4) . . . . ?
C49 C38 B2 C67 -159.4(4) . . . . ?
C35 C38 B2 C38 -167.4(4) . . . 2_655 ?
C49 C38 B2 C38 20.6(4) . . . 2_655 ?
C28 C36 C67 C36 0.9(3) . . . 2_655 ?
N1 C36 C67 C36 180.0(4) . . . 2_655 ?
C28 C36 C67 B2 -179.1(3) . . . . ?
N1 C36 C67 B2 0.0(4) . . . . ?
C38 B2 C67 C36 -16.4(3) 2_655 . . 2_655 ?
C38 B2 C67 C36 163.6(3) . . . 2_655 ?
C38 B2 C67 C36 163.6(3) 2_655 . . . ?
C38 B2 C67 C36 -16.4(3) . . . . ?
 
_refine_diff_density_max    1.056
_refine_diff_density_min   -0.477
_refine_diff_density_rms    0.111

_shelx_res_file
;

    shelxl.res created by SHELXL-2014/7


TITL B3N3
REM  Yadorkari-X generated
CELL 0.78207 11.4208 16.0209 18.8012 90.0000 94.5369 90.0000
ZERR 4.0 0.0007 0.0009 0.0011 0.0000 0.0044 0.0000
LATT 7
SYMM -X, +Y, 1/2-Z
REM  SPGR C2/c monoclinic
SFAC C H B N
DISP C   0.0041   0.0020   13.9
DISP H   0.0000   0.0000   0.7
DISP B   0.0020   0.0009   7.6
DISP N   0.0078   0.0041   24.5
UNIT 192 144 12 12
SIZE 0.30 0.20 0.05
TEMP -173.0
L.S. 10
FMAP 2
PLAN -50
ACTA
CONF
LIST 4
MERG 2
OMIT 0.000000 55.000000
OMIT 0 2 2
OMIT 0 2 1
OMIT      0   4   1
OMIT     -3  11   7
OMIT     0   2   5
EADP C29A C29B
EADP C39A C39B
EADP C34A C34B
EADP C42A C42B
EADP C43A C43B
EADP C45A C45B
EADP C54A C54B
WGHT    0.200000
FVAR       4.24478   0.86922
PART 1
C29A  1    0.415575    0.249457    0.569761    21.00000    0.02804    0.04204 =
         0.01939    0.00163    0.01057   -0.00021
C39A  1    0.414686    0.319223    0.432486    21.00000    0.03927    0.02934 =
         0.01797   -0.00020    0.00980   -0.00279
C34A  1    0.409146    0.233027    0.439303    21.00000    0.03270    0.03583 =
         0.01842   -0.00276    0.00935   -0.00349
C42A  1    0.411208    0.200419    0.509068    21.00000    0.04521    0.03184 =
         0.02105    0.00635    0.00969   -0.00309
AFIX  43
H42A  2    0.409502    0.141512    0.514683    21.00000   -1.20000
AFIX   0
C43A  1    0.427400    0.369512    0.493680    21.00000    0.03959    0.02956 =
         0.02769   -0.00126    0.01076   -0.00391
AFIX  43
H43A  2    0.435920    0.428169    0.488777    21.00000   -1.20000
AFIX   0
C45A  1    0.427693    0.335467    0.559844    21.00000    0.04550    0.04180 =
         0.01886   -0.00781    0.00840   -0.00345
AFIX  43
H45A  2    0.436343    0.370948    0.600405    21.00000   -1.20000
AFIX   0
C54A  1    0.412346    0.213653    0.642820    21.00000    0.05336    0.04771 =
         0.02448    0.00266    0.00372   -0.00868
AFIX 137
H54A  2    0.331476    0.214550    0.656774    21.00000   -1.50000
H54B  2    0.462539    0.246924    0.676686    21.00000   -1.50000
H54C  2    0.440902    0.155964    0.642998    21.00000   -1.50000
AFIX  66
PART 2
C29B  1    0.428455    0.252313    0.568422   -21.00000    0.02804    0.04204 =
         0.01939    0.00163    0.01057   -0.00021
C42B  1    0.412005    0.304430    0.509370   -21.00000    0.04521    0.03184 =
         0.02105    0.00635    0.00969   -0.00309
AFIX  43
H42B  2    0.404174    0.362932    0.515744   -21.00000   -1.20000
AFIX  65
C34B  1    0.407012    0.270949    0.440992   -21.00000    0.03270    0.03583 =
         0.01842   -0.00276    0.00935   -0.00349
C39B  1    0.418470    0.185352    0.431666   -21.00000    0.03927    0.02934 =
         0.01797   -0.00020    0.00980   -0.00279
C43B  1    0.434920    0.133235    0.490717   -21.00000    0.03959    0.02956 =
         0.02769   -0.00126    0.01076   -0.00391
AFIX  43
H43B  2    0.442750    0.074733    0.484343   -21.00000   -1.20000
AFIX  65
C45B  1    0.439912    0.166714    0.559095   -21.00000    0.04550    0.04180 =
         0.01886   -0.00781    0.00840   -0.00345
AFIX  43
H45B  2    0.451155    0.131094    0.599454   -21.00000   -1.20000
AFIX   0
C54B  1    0.414294    0.294917    0.642911   -21.00000    0.05336    0.04771 =
         0.02448    0.00266    0.00372   -0.00868
AFIX 137
H54D  2    0.431068    0.354725    0.639659   -21.00000   -1.50000
H54E  2    0.469309    0.269419    0.679244   -21.00000   -1.50000
H54F  2    0.333710    0.287070    0.656098   -21.00000   -1.50000
AFIX   0

PART 1
C53A  1    0.266465    0.699377    0.340041    11.00000    0.07082    0.04053 =
         0.05167   -0.00280    0.00826    0.01727
AFIX 137
H53A  2    0.328046    0.731327    0.367190    11.00000   -1.50000
H53B  2    0.191788    0.706814    0.361591    11.00000   -1.50000
H53C  2    0.258440    0.719288    0.290610    11.00000   -1.50000
AFIX   0

N2    4    0.500000    0.097449    0.250000    10.50000    0.04144    0.05719 =
         0.01978    0.00000    0.01386    0.00000
N1    4    0.414053    0.356005    0.363887    11.00000    0.04552    0.05384 =
         0.01928   -0.00757    0.01306    0.00090
C28   1    0.457508    0.225134    0.308585    11.00000    0.02739    0.07515 =
         0.01555    0.00419    0.00759   -0.00484
C30   1    0.389195    0.084517    0.357636    11.00000    0.03321    0.05690 =
         0.01783    0.00485    0.00996    0.01099
C32   1    0.500000    0.181236    0.250000    10.50000    0.04322    0.04514 =
         0.01991    0.00000    0.01157    0.00000
C33   1    0.290316    0.471416    0.394821    11.00000    0.06285    0.03612 =
         0.02050   -0.00454    0.01603   -0.00463
AFIX  43
H33   2    0.256603    0.436080    0.428269    11.00000   -1.20000
AFIX   0
C35   1    0.377081    0.440298    0.354657    11.00000    0.04372    0.03820 =
         0.02061   -0.00579    0.01072   -0.00323
C36   1    0.457102    0.311826    0.306809    11.00000    0.04091    0.04529 =
         0.01809   -0.00005    0.00870   -0.00133
C37   1    0.315239    0.036975    0.398067    11.00000    0.06255    0.02662 =
         0.02227    0.00128    0.01755    0.00137
AFIX  43
H37   2    0.290068    0.060576    0.440634    11.00000   -1.20000
AFIX   0
C38   1    0.421753    0.492598    0.302265    11.00000    0.04555    0.05519 =
         0.03123   -0.00109    0.01047   -0.00834
C95   1    0.426283    0.050020    0.294636    11.00000    0.04295    0.04852 =
         0.02954   -0.00820    0.01256   -0.00042
C41   1    0.383152   -0.025735    0.271312    11.00000    0.05864    0.03896 =
         0.04517   -0.00095    0.02035    0.00353
AFIX  43
H41   2    0.402150   -0.046543    0.226329    11.00000   -1.20000
AFIX   0
C44   1    0.277489   -0.041957    0.379120    11.00000    0.05625    0.03590 =
         0.03282    0.00450    0.00437    0.00046
B1    3    0.417478    0.174895    0.370963    11.00000    0.03352    0.06082 =
         0.01474    0.01241    0.00906    0.00067
C47   1    0.251836    0.553185    0.387067    11.00000    0.06116    0.03780 =
         0.02948   -0.00323    0.00372    0.00191
AFIX  43
H47   2    0.190542    0.571702    0.414560    11.00000   -1.20000
AFIX   0
C48   1    0.298749    0.608726    0.341162    11.00000    0.05347    0.04046 =
         0.04468    0.00202    0.00591   -0.00144
C49   1    0.376496    0.576718    0.298704    11.00000    0.07832    0.03388 =
         0.03195    0.00669    0.00319    0.00459
AFIX  43
H49   2    0.404066    0.612447    0.263320    11.00000   -1.20000
AFIX   0
C50   1    0.313260   -0.071628    0.311919    11.00000    0.07879    0.03068 =
         0.03981   -0.00570    0.00151   -0.00319
AFIX  43
H50   2    0.287272   -0.125013    0.295302    11.00000   -1.20000
AFIX   0
B2    3    0.500000    0.452874    0.250000    10.50000    0.04316    0.06127 =
         0.02511    0.00000    0.00623    0.00000
C52   1    0.204918   -0.093429    0.422845    11.00000    0.07760    0.05660 =
         0.05050   -0.00739    0.02698   -0.01642
AFIX 137
H52A  2    0.254377   -0.135204    0.448733    11.00000   -1.50000
H52B  2    0.144034   -0.121627    0.391984    11.00000   -1.50000
H52C  2    0.167847   -0.057854    0.457037    11.00000   -1.50000
AFIX   0
C67   1    0.500000    0.359477    0.250000    10.50000    0.02295    0.08623 =
         0.01105    0.00000    0.00908    0.00000
HKLF 4 1 1 0 0 0 1 0 0 0 1

REM  B3N3
REM R1 =  0.1294 for    1881 Fo > 4sig(Fo)  and  0.1680 for all    2936 data
REM    260 parameters refined using      0 restraints

END

WGHT      0.2000      0.0000

REM Highest difference peak  1.056,  deepest hole -0.477,  1-sigma level  0.111
Q1    1   0.2010  0.5967  0.4242  11.00000  0.05    1.06
Q2    1   0.2631  0.8029  0.3416  11.00000  0.05    0.97
Q3    1   0.3841  0.5272  0.2693  11.00000  0.05    0.92
Q4    1   0.2982 -0.1110  0.3430  11.00000  0.05    0.90
Q5    1   0.3877 -0.0791  0.2992  11.00000  0.05    0.87
Q6    1   0.5000  0.3860  0.2500  10.50000  0.05    0.82
Q7    1   0.4233  0.4414  0.2909  11.00000  0.05    0.62
Q8    1   0.4202 -0.0011  0.3067  11.00000  0.05    0.61
Q9    1   0.3035  0.5676  0.3085  11.00000  0.05    0.55
Q10   1   0.4153  0.1242  0.3640  11.00000  0.05    0.52
Q11   1   0.5000  0.0332  0.2500  10.50000  0.05    0.42
Q12   1   0.4560  0.1611  0.3072  11.00000  0.05    0.31
Q13   1   0.5000  0.2862  0.2500  10.50000  0.05    0.28
Q14   1   0.2710  0.2834  0.6488  11.00000  0.05    0.24
Q15   1   0.4227 -0.1121  0.3607  11.00000  0.05    0.22
Q16   1   0.5732  0.4828  0.3373  11.00000  0.05    0.21
Q17   1   0.4626  0.2178  0.6613  11.00000  0.05    0.21
Q18   1   0.5430  0.0609  0.3712  11.00000  0.05    0.20
Q19   1   0.3823  0.5472  0.2193  11.00000  0.05    0.19
Q20   1   0.2659 -0.1352  0.2815  11.00000  0.05    0.19
Q21   1   0.3560  0.5290  0.2037  11.00000  0.05    0.19
Q22   1   0.5254  0.0777  0.5416  11.00000  0.05    0.18
Q23   1   0.0792  0.7220  0.3266  11.00000  0.05    0.18
Q24   1   0.0862  0.6672  0.3644  11.00000  0.05    0.17
Q25   1   0.6052  0.2479  0.5770  11.00000  0.05    0.17
Q26   1   0.4026  0.4673  0.4867  11.00000  0.05    0.17
Q27   1   0.5111  0.4669  0.4550  11.00000  0.05    0.17
Q28   1   0.4769  0.0006  0.3659  11.00000  0.05    0.16
Q29   1   0.3174  0.2038  0.2841  11.00000  0.05    0.16
Q30   1   0.4381  0.4965  0.4357  11.00000  0.05    0.16
Q31   1   0.4054 -0.0645  0.2093  11.00000  0.05    0.16
Q32   1   0.1647  0.8003  0.3363  11.00000  0.05    0.16
Q33   1   0.1402  0.6697  0.4364  11.00000  0.05    0.16
Q34   1   0.4606  0.6131  0.2555  11.00000  0.05    0.16
Q35   1   0.3462  0.6115  0.2072  11.00000  0.05    0.16
Q36   1   0.3594  0.4837  0.2087  11.00000  0.05    0.16
Q37   1   0.1963  0.8008  0.2785  11.00000  0.05    0.16
Q38   1   0.3212  0.3391  0.6592  11.00000  0.05    0.16
Q39   1   0.3236  0.0696  0.4885  11.00000  0.05    0.16
Q40   1   0.2605  0.0978  0.4367  11.00000  0.05    0.16
Q41   1   0.4432  0.4395  0.6702  11.00000  0.05    0.16
Q42   1   0.1079  0.6169  0.3372  11.00000  0.05    0.15
Q43   1   0.3874  0.6218  0.4792  11.00000  0.05    0.15
Q44   1   0.6054  0.4333  0.2998  11.00000  0.05    0.15
Q45   1   0.5009  0.3372  0.6550  11.00000  0.05    0.15
Q46   1   0.3854  0.5833  0.4210  11.00000  0.05    0.15
Q47   1   0.2973  0.7707  0.4068  11.00000  0.05    0.15
Q48   1   0.1994 -0.0863  0.2940  11.00000  0.05    0.15
Q49   1   0.5388  0.2987  0.7445  11.00000  0.05    0.15
Q50   1   0.3728 -0.1511  0.3199  11.00000  0.05    0.15
;
_shelx_res_checksum   18934

_shelx_hkl_file
;
   0   0   1 1553.92  139.65
   0   0  -1 1405.94  153.21
   0   0   3 -165.90  221.96
   0   0  -3  874.81  343.03
   0   0  -3 -285.61  244.90
   0   0   5  -60.47  602.87
   0   0  -5  905.11  555.35
   0   0   6  417.43  569.24
   0   0  -6  591.20  546.87
   0   0   7  104.32  526.41
   0   0  -7   95.48  345.28
   0   0   8 6764.81  869.25
   0   0  -8 5930.86  605.28
   0   0   9 1338.88  655.27
   0   0  -9  185.89  411.46
   0   0  10  137.34  606.83
   0   0 -10  180.18  393.31
   0   0  11 -175.94  343.15
   0   0 -11 -181.47  401.48
   0   0  12  126.97  697.69
   0   0 -12 1976.01  665.55
   0   0  13   51.15  644.74
   0   0 -13  393.69  608.31
   0   0  14105494.9 5753.15
   0   0 -14110400.6 5691.55
   0   0  15 -337.99  760.77
   0   0 -15  -84.06  513.04
   0   0  16203162.912130.39
   0   0 -16208602.211465.06
   0   0  17  243.48  828.16
   0   0 -17 -362.09  579.58
   0   0  1833823.60 2589.76
   0   0 -1834202.16 2107.72
   0   0  19  580.44  912.28
   0   0 -19  205.81  640.75
   0   0  2078672.24 4966.14
   0   0  21 -103.32  880.33
   0   0  2222737.31 2248.06
   0  -2   041056.08 1523.78
   0  -2   049861.59 1537.99
   0   2   045378.51 1697.66
   0   2   1 1783.06  208.38
   0  -2   1 2434.79  367.21
   0  -2   1 1186.55  391.13
   0   2   1 1656.01  363.47
   0  -2  -1 2129.66  325.26
   0   2  -1 1322.08  445.40
   0   2  -1 1204.15  292.26
   0  -2  -1 1991.60  464.84
   0   2   210360.15  386.72
   0  -2   313532.38  969.90
   0   2   315486.89 1469.87
   0   2   313293.39  659.39
   0  -2   315174.44 1308.52
   0   2  -314819.63 1395.52
   0  -2  -314737.88  775.91
   0   2  -314393.30  955.55
   0  -2  -312396.07  941.16
   0  -2   426951.50 1276.36
   0   2   430526.52 1649.15
   0  -2   430177.29 1840.07
   0  -2  -430409.88 1230.18
   0  -2  -431147.52 1564.41
   0   2  -431052.84 1842.08
   0   2  -428170.52 1382.12
   0   2   5 2002.83  643.83
   0   2   5 2709.08  307.78
   0  -2   5 3081.04  790.55
   0  -2  -5 1723.93  397.06
   0   2  -5 2882.68  684.56
   0  -2   6114918.9 5420.98
   0   2   6103707.5 4263.15
   0   2   6114804.0 5175.26
   0   2  -6114048.1 5121.44
   0  -2  -6113595.6 4520.93
   0   2   7 1192.72  563.63
   0  -2   7  207.19  623.54
   0   2  -7 1069.97  520.37
   0  -2  -7  437.39  333.49
   0  -2   8171689.8 8676.00
   0   2   8162388.4 8026.85
   0  -2  -8170954.5 7621.01
   0   2  -8170078.4 8317.37
   0  -2   9  678.84  702.91
   0   2   9  814.96  609.96
   0  -2  -9  620.97  358.53
   0   2  -9  934.69  820.67
   0   2  10205107.310803.53
   0  -2  10206840.311206.53
   0  -2 -10203520.2 9820.03
   0   2 -10200035.611010.48
   0  -2  11 1674.79  752.06
   0   2  11 1025.48  635.00
   0  -2 -11  958.27  398.36
   0   2 -11 1363.14  585.83
   0  -2  1244735.86 2636.01
   0   2  1244637.88 2480.48
   0  -2 -1246790.87 2299.54
   0   2 -1247447.98 2384.09
   0  -2  13  256.25  685.07
   0   2  13  316.21  622.27
   0   2 -13  342.77  778.60
   0  -2 -13   76.98  384.24
   0   2  1461618.89 3441.64
   0  -2  1460793.47 3609.78
   0   2 -1461162.27 3255.40
   0  -2 -1466395.27 3316.90
   0   2  15 3102.69  970.31
   0  -2  15 2963.53 1086.20
   0  -2 -15 2357.56  614.74
   0   2 -15 2658.06 1134.84
   0  -2  1658490.08 3735.74
   0   2  1659003.96 3594.15
   0   2 -1661990.57 3486.51
   0  -2 -1659020.97 2919.66
   0   2  1728270.89 2326.77
   0  -2  1726119.06 2398.70
   0  -2 -1723004.79 2015.40
   0   2 -1723425.66 2043.57
   0   2  18  304.53  790.47
   0  -2  18 -424.89  786.47
   0  -2 -18  -15.60  475.41
   0   2 -18  210.77  898.85
   0   2  19  964.45  972.89
   0  -2  19  149.47 1026.48
   0   2 -19 2594.28  841.02
   0   2  20 -297.65 1197.84
   0  -2  20 6962.96 1227.11
   0   2  21 -216.30 1177.08
   0  -2  21 5771.69 1266.66
   0  -2  22  365.53  982.91
   0   2  22  104.99  911.82
   0   4   032695.83 1943.04
   0  -4   033377.32 1841.20
   0   4   1  301.89  552.30
   0   4   1  248.79  403.71
   0  -4   1 -986.07  691.74
   0   4  -1  420.51  615.20
   0  -4  -1  225.15  379.05
   0  -4  -1  414.07  456.34
   0   4  -1 -387.11  521.57
   0   4   224016.91  926.24
   0  -4   223913.84 1915.39
   0   4   220980.02 1315.63
   0   4  -220450.40 1567.37
   0  -4  -223112.69 1641.90
   0   4  -221352.60 1038.88
   0  -4  -221348.28 1078.82
   0   4   3  484.00  526.11
   0  -4   3  711.87  633.98
   0   4   3 1008.13  729.50
   0  -4  -3 1362.61  429.67
   0   4  -3  950.98  393.96
   0   4  -3 1072.19  713.30
   0  -4   418897.87 1266.40
   0   4   418771.49 1073.47
   0   4   416464.69 1209.34
   0   4  -416960.62 1341.42
   0  -4  -416302.75  858.69
   0  -4   5 2867.37  687.31
   0   4   5 1725.67  529.81
   0   4  -5 2374.00  710.03
   0  -4  -5 1175.33  400.84
   0  -4   645805.96 2383.86
   0   4   647606.79 2536.18
   0   4  -645726.43 2431.43
   0  -4  -648121.53 1896.16
   0   4   7  696.88  554.15
   0  -4   7  567.81  654.71
   0  -4  -7 1202.35  366.44
   0   4  -7  386.54  722.76
   0   4   8123927.0 6363.27
   0  -4   8114931.3 5929.09
   0   4  -8122564.1 6160.27
   0  -4  -8118638.6 5017.73
   0   4   9 5721.65  726.91
   0  -4   9 2517.93  883.81
   0   4  -9 2336.25  861.07
   0  -4  -9 2569.08  611.45
   0   4  1083039.31 3943.68
   0  -4  1083184.36 4311.37
   0  -4 -1084298.81 3501.26
   0   4 -1088326.40 4449.09
   0  -4  1126449.17 2005.78
   0   4  1127649.08 1696.85
   0   4 -1129010.59 2007.75
   0  -4 -1126698.45 1606.24
   0  -4  1231221.51 2061.20
   0   4  1227483.47 1688.00
   0  -4 -1230873.14 1631.68
   0   4 -1229204.47 1956.11
   0   4  13  599.82  637.40
   0  -4  13  585.26  788.53
   0  -4 -13  585.11  557.63
   0   4 -13  826.50  741.90
   0   4  1411264.09 1189.46
   0  -4  14 8967.70 1349.21
   0   4 -1411185.03 1333.83
   0  -4 -14 9923.44 1021.95
   0   4  1512861.41 1379.63
   0  -4  1510786.34 1002.70
   0  -4 -1511558.70  953.17
   0   4 -1511521.01 1495.11
   0   4  16  456.67  699.59
   0  -4  16   72.93  814.66
   0  -4 -16 -203.33  442.27
   0   4 -16 -586.96  752.60
   0   4  17  439.85  697.59
   0  -4  17 -283.27  838.83
   0  -4 -17  286.42  628.29
   0   4 -17 -400.89  752.09
   0   4  18 9610.43 1297.35
   0  -4  18 6741.87 1485.34
   0   4 -18 7724.69 1266.17
   0  -4  19 3178.52 1245.04
   0   4  19 3181.79 1088.89
   0   4 -19 3490.42 1068.62
   0  -4  20  138.43  910.95
   0   4  20  163.63  809.35
   0   4 -20 -564.18  786.19
   0  -4  21 2183.63 1150.16
   0   4  21 -299.85 1027.84
   0   6   056970.55 2728.05
   0   6   055465.28 2360.60
   0  -6   057538.00 2341.76
   0   6   1  847.09  505.90
   0  -6   1  896.52  513.97
   0   6   1 1642.45  590.20
   0  -6  -1 1356.74  457.03
   0   6  -1  640.71  439.64
   0   6  -1 1780.08  667.98
   0   6   2 7576.52  514.37
   0  -6   210695.15 1255.69
   0   6   2 8135.89  796.55
   0   6  -2 7670.48  571.19
   0  -6  -2 9085.03  633.04
   0   6   3 4492.59  426.76
   0   6   3 4545.86  668.76
   0  -6   3 4419.22  826.94
   0   6  -3 3892.56  838.59
   0  -6  -3 6156.13 1235.42
   0   6   418403.07  968.62
   0   6   420105.70 1330.56
   0  -6   421233.98 1394.85
   0   6  -421377.36 1503.15
   0  -6  -418434.11 1022.93
   0  -6   5 2250.87 1083.67
   0   6   5 2158.82  752.77
   0   6  -5 2581.77  819.71
   0  -6  -5 1467.77  477.93
   0  -6   6 2205.42  864.77
   0   6   6 1767.60  515.77
   0  -6  -6 3059.37  482.29
   0   6  -6 3992.67  906.12
   0  -6   7   83.93  616.20
   0   6   7  -30.86  382.48
   0   6  -7  449.37  676.33
   0  -6  -7  -23.90  335.44
   0   6   852706.21 2380.17
   0  -6   851132.41 2783.61
   0  -6  -849865.61 2413.71
   0   6  -853450.05 3013.05
   0   6   915830.52 1058.93
   0  -6   914361.51  934.66
   0   6  -915106.10 1439.83
   0  -6  -914053.09  883.86
   0  -6  10 2225.07  810.50
   0   6  10 1807.50  787.81
   0   6 -10 2239.93  784.89
   0  -6 -10  998.52  401.59
   0  -6  1110418.69 1248.38
   0   6  1110325.25  957.39
   0   6 -11 5532.78 1137.45
   0  -6 -11 7023.44  829.69
   0  -6  12 3460.34 1062.30
   0   6  12 5242.32  770.75
   0  -6 -12 4476.76  529.83
   0   6 -12 3807.23  993.42
   0   6  13  246.94  785.88
   0  -6  13  106.30  809.90
   0  -6 -13  264.11  381.42
   0   6 -13  310.69  767.82
   0   6  14 5833.23 1213.34
   0  -6  14 2489.21 1235.42
   0  -6 -14 5176.90  612.57
   0   6 -14 2824.59 1180.08
   0  -6  15 -143.62  933.53
   0   6  15  671.13  691.10
   0   6 -15 -162.36  859.13
   0  -6 -15  525.62  585.67
   0  -6  16 5169.50 1248.10
   0   6  16 4034.10  938.56
   0   6 -16 3362.33 1091.19
   0  -6 -16 3574.89  853.63
   0  -6  17  465.06  513.63
   0   6  17  149.55  683.85
   0   6 -17 -448.57  780.88
   0  -6 -17  -92.11  426.61
   0  -6  18 5878.78 1414.88
   0   6  18 7151.27 1165.18
   0   6 -18 5544.77 1266.55
   0   6  19  289.12  786.44
   0  -6  19  619.58  976.09
   0   6 -19   14.03  853.20
   0  -6  20 1314.05 1100.94
   0   6  20  509.11 1204.36
   0   6 -20  159.57 1303.01
   0   6  21  -58.48  799.67
   0  -6  21 -165.10 1000.94
   0   8   0231291.912877.53
   0  -8   0240507.812674.02
   0   8   1187436.410075.27
   0  -8   1182482.010057.97
   0  -8  -1181309.4 9434.18
   0   8  -1186402.610309.75
   0   8   224807.14 1466.83
   0   8   222572.61 1380.82
   0  -8   225312.31 2201.56
   0  -8  -227232.58 1525.11
   0   8  -222176.25 1615.70
   0   8   328568.61 1677.33
   0  -8   323252.94 2173.83
   0   8  -327763.31 1987.53
   0  -8  -328056.31 2232.49
   0  -8   440431.40 2544.64
   0   8   441247.48 2162.17
   0   8  -438970.09 2286.60
   0  -8  -438705.73 1901.43
   0   8   5 6940.37  619.43
   0  -8   5 5940.61 1427.21
   0  -8  -5 7979.55  747.15
   0   8  -510132.05 1083.16
   0  -8   6 3775.51  915.06
   0   8   6 6012.76  811.81
   0  -8  -6 5423.84  605.50
   0   8  -6 4884.51  950.62
   0  -8   7 1489.67  710.09
   0   8   7  662.37  567.91
   0   8  -7  999.10  723.86
   0  -8  -7  721.57  427.58
   0  -8   8  958.04  647.09
   0   8   8  -16.30  498.58
   0  -8  -8 -407.53  484.46
   0   8  -8 -275.65  621.57
   0  -8   917486.83 1725.26
   0   8   920059.41 1561.00
   0  -8  -919724.86 1199.18
   0   8  -919140.72 1747.68
   0  -8  10 4058.11 1054.97
   0   8  10 2570.85  615.67
   0   8 -10 3313.89  983.55
   0  -8 -10 4229.10  554.52
   0   8  11 1670.29  599.37
   0  -8  11 2061.75  999.58
   0  -8 -11 1746.96  495.52
   0   8 -11 2087.33  944.06
   0   8  1210161.57  942.85
   0  -8  1210573.64 1553.73
   0  -8 -1210204.45 1011.97
   0   8 -12 9515.90 1420.27
   0  -8  13  425.67 1024.07
   0   8  13  391.29  792.51
   0   8 -13  245.66  879.08
   0  -8 -13  681.45  420.64
   0  -8  14  949.59  989.31
   0   8  14   65.57  576.09
   0   8 -14  693.25  870.38
   0  -8 -14  460.80  425.97
   0  -8  15 2654.18 1167.46
   0   8  15 1304.98  773.22
   0   8 -15 1784.59 1054.14
   0  -8 -15 2039.41  515.98
   0  -8  16 1514.44 1168.03
   0   8  16 1537.18  772.72
   0  -8 -16 1318.76  717.31
   0   8 -16 2243.03 1013.04
   0   8  17  800.01  755.88
   0  -8  17  795.27 1178.74
   0   8 -17 1639.02  984.44
   0  -8  18 4096.37 1380.89
   0   8  18 3726.87  960.13
   0   8 -18 3285.42 1212.58
   0   8  19  522.10  848.24
   0  -8  19 2100.22 1212.77
   0   8 -19 1552.25 1062.98
   0  -8  20 3410.18 1385.06
   0   8  20 2164.74  954.03
   0   8 -20 1917.92 1616.47
   0 -10   016391.18  889.09
   0  10   016884.92 1365.72
   0  10   115134.97 1198.83
   0 -10   1 8592.04  863.78
   0  10  -114322.60 1276.62
   0 -10  -1 9795.69  870.15
   0  10   211132.93 1046.88
   0 -10   213412.07  924.84
   0 -10  -214988.48 1084.63
   0  10  -213886.39 1242.62
   0  10   3 2175.26  659.35
   0 -10   3 1348.59  897.58
   0 -10  -3  -11.77  593.14
   0  10  -3 1729.21  719.49
   0  10   417824.00 1058.31
   0 -10   419187.16 2147.44
   0  10  -420358.14 1098.32
   0 -10  -417627.19  927.31
   0 -10   5 1505.34  869.22
   0  10   5 1031.05  405.34
   0  10  -5  -97.08  742.43
   0 -10  -5  635.71  527.86
   0  10   656060.35 2823.23
   0 -10   651805.32 3178.66
   0  10  -653042.96 3094.50
   0 -10  -651994.29 2535.33
   0  10   738911.81 2317.16
   0 -10   741238.96 3704.42
   0  10  -739111.65 2695.77
   0 -10  -742980.10 2243.80
   0  10   8 6307.53  828.98
   0 -10   8 5937.75 1217.79
   0  10  -8 6292.92 1145.53
   0 -10  -8 6392.54  750.62
   0 -10   968964.90 4717.11
   0  10   967829.48 3927.81
   0  10  -964274.12 4432.98
   0 -10  -969921.93 3761.83
   0 -10  10 2090.24 1465.80
   0  10  10 1244.41  721.39
   0 -10 -10 1775.80  561.79
   0  10 -10 1802.11  962.27
   0 -10  11 4568.56 1334.37
   0  10  11 1865.09  932.43
   0  10 -11 4223.70 1193.57
   0 -10 -11 6158.41  691.61
   0  10  1227031.35 1571.78
   0 -10  1223551.40 2250.39
   0  10 -1220318.05 2097.45
   0 -10 -1224426.06 1704.84
   0 -10  13 -431.48 1131.20
   0  10  13 1028.60  591.15
   0  10 -13 1183.39  994.80
   0 -10 -13 1748.21  538.21
   0  10  14 1394.94  802.91
   0 -10  14 2037.50 1074.81
   0 -10 -14  170.73  488.09
   0  10 -14 1143.17  941.37
   0 -10  15   52.63 1027.09
   0  10  15  190.25  556.50
   0  10 -15 -144.91  896.68
   0 -10 -15  430.03  457.51
   0 -10  16 1747.17 1249.76
   0  10 -16 1918.53 1088.16
   0 -10  17 -558.59 1192.52
   0  10 -17-2154.98 1013.14
   0 -10  18 4633.98 1575.20
   0  10 -18 5978.75 1369.41
   0 -10  19  551.67 1153.44
   0  10 -19  587.63 1032.52
   0 -12   011559.37  832.93
   0  12   010599.47 1189.56
   0 -12   1 -228.54  356.13
   0  12   1  208.63  595.68
   0 -12  -1 -374.82  499.04
   0  12  -1 -171.52  680.41
   0  12   2  312.19  598.82
   0 -12   2 -258.83  378.67
   0  12  -2  598.43  669.85
   0 -12  -2   -0.90  582.23
   0  12   3 1652.77  704.84
   0 -12   3  311.43  506.46
   0  12  -3  818.29  746.80
   0 -12  -3  237.87  585.76
   0  12   4 1429.46  673.19
   0 -12   4 2220.27  793.11
   0 -12  -4 2540.67  473.22
   0  12  -4 1053.79  821.80
   0  12   531967.75 2233.73
   0 -12   540141.65 3853.32
   0  12  -542602.56 2862.33
   0 -12  -541694.33 2540.36
   0  12   612940.94 1212.60
   0 -12   614343.93 2503.93
   0 -12  -615061.16 1235.99
   0  12  -612994.23 1582.12
   0  12   7 2464.74  706.05
   0 -12   7 3298.72 1432.26
   0 -12  -7 3818.63  774.62
   0  12  -7 2702.51 1150.21
   0 -12   8128735.8 8397.82
   0  12  -8131646.0 8250.82
   0 -12  -8130405.5 6985.51
   0 -12   989341.00 6519.75
   0 -12  -984860.31 4666.34
   0  12  -989403.11 5920.03
   0 -12  10 7020.77 1631.15
   0 -12 -10 9533.66 1201.87
   0  12 -10 6716.14 1371.09
   0 -12  1120185.75 2445.93
   0 -12 -1120037.48 1782.87
   0  12 -1122571.57 2175.59
   0 -12  12 2985.63 1347.61
   0 -12 -12 4218.53  692.59
   0  12 -12 1596.24 1135.28
   0 -12  13 2285.28 1212.14
   0 -12 -13 1771.31  626.85
   0  12 -13 1474.50 1026.63
   0 -12  14 5888.86 1613.96
   0  12 -14 6024.37 1395.64
   0 -12 -14 7193.71  826.33
   0 -12  15 1548.18 1155.62
   0  12 -15  312.66  978.29
   0 -12  1617729.86 2111.54
   0  12 -1610517.19 1714.52
   0 -12  17  731.36 1156.10
   0  12 -17  861.49 1027.16
   0  14   0 4293.06  965.47
   0  14   1  940.63  757.74
   0  14  -1  402.61  446.23
   0  14   2 6199.63 1102.20
   0  14  -2 5154.15 1090.28
   0  14   3  297.14  754.75
   0  14  -3  383.09  822.28
   0  14  -4 3795.43 1107.20
   0 -14  -4 3689.31  993.04
   0 -14  -5  946.51  734.49
   0  14  -5 -316.29  775.70
   0 -14   679661.26 5799.23
   0 -14  -683063.82 4638.11
   0  14  -671792.56 4726.17
   0 -14   7 7297.78 1495.24
   0  14  -7 6986.40  841.25
   0 -14  -7 9527.17 1154.77
   0 -14   8 1615.25 1196.34
   0  14  -8 1028.18  915.80
   0 -14  -8  946.01  710.69
   0 -14   9 2957.57 1495.06
   0  14  -9 4365.36 1189.20
   0 -14  -9 4290.19  913.22
   0 -14  10 1906.19 1322.20
   0  14 -10 -282.76 1052.46
   0 -14 -10 2406.41  717.40
   0 -14  11 3287.48 1377.72
   0  14 -11 1670.25 1134.42
   0 -14 -11 2400.09 1004.13
   0 -14  12 4763.79 1487.87
   0 -14 -12 4842.01 1152.34
   0  14 -12 3261.18 1275.60
   0 -14  13  904.05 1404.22
   0  14 -13 2989.97 1217.54
   0 -14 -13 3283.15  778.74
   0 -14  14 4709.04 1405.31
   0  14 -14 1655.69 1268.49
   0 -14  15 1687.56 1349.45
   0  14 -15  257.92 1091.52
   0  16   0 1870.10  949.76
   0  16   110704.39 1495.81
   0  16  -111781.40 1446.44
   0  16   2  -80.74  862.48
   0  16  -2-1233.35  782.16
   0 -16  -3  733.48  572.31
   0  16  -3  463.67  853.23
   0  16  -4  245.65 1033.71
   0 -16  -4 5493.21 1168.11
   0 -16  -5 1027.77  805.71
   0  16  -5 -726.47  849.65
   0 -16  -616293.95 1594.47
   0  16  -612564.20 1119.33
   0  16  -7  765.29  821.48
   0 -16  -7 -243.88  713.24
   0 -16  -8 3556.81 1039.19
   0  16  -8 5107.14 1169.36
   0 -16  -9 -127.49  690.07
   0  16  -9 -228.97  853.42
   0  16 -10 3645.94 1298.94
   0 -16 -10 5694.49  994.04
   0 -16 -11  577.06  710.87
   0  16 -11  526.02  964.80
   0  16 -12  602.61  924.59
   0 -16 -12   21.62  653.14
   0  18   0 4989.69 1198.65
   0  18   1  313.01  948.26
   0  18  -1 1804.64  939.31
   0 -18  -2  287.79  636.73
   0  18  -2 2354.44  891.80
   0  18  -3 1465.40  944.94
   0 -18  -3 2944.63 1174.31
   0  18  -4 -270.59  933.43
   0 -18  -4 2996.99 1028.37
   0  18  -5  255.62  905.40
   0 -18  -5  647.72  879.17
   0  18  -6 -534.09  951.27
   0 -18  -6-1298.52 1222.05
   0 -18  -7 3703.24 1015.65
   0  18  -7 2860.01 1243.40
  -1   1  22 -590.82  956.18
  -1  -1  22 -189.27  932.20
  -1  -1  21 3355.61 1140.77
  -1   1  21 1642.88 1113.78
  -1  -1  2017699.28 1909.03
  -1   1  2015835.51 1838.77
  -1   1  1911425.82 1516.97
  -1  -1  19 8689.12 1505.96
   1   1 -18 9843.79 1121.53
  -1  -1  1812194.83 1592.70
  -1   1  18 6764.68 1465.95
   1  -1 -1726466.10 1883.85
   1   1 -1724668.52 2078.18
  -1  -1  1727038.81 2147.54
  -1   1  1725160.34 2114.51
   1   1 -16 4179.94 1114.29
   1  -1 -16 4702.77  948.48
  -1  -1  16 3928.70 1115.74
  -1   1  16 5177.52 1189.84
   1   1 -15186705.5 9673.31
   1  -1 -15182623.3 9543.39
  -1  -1  15163477.9 9494.78
  -1   1  15172064.8 9754.81
   1   1 -14 4439.26  953.87
   1  -1 -14 3935.51  765.93
  -1   1  14 3260.45  991.12
  -1  -1  14 4974.19  622.78
   1   1 -13 8729.85  775.31
   1  -1 -13 8871.77  838.63
  -1  -1  13 7871.36 1086.28
  -1   1  13 8371.33 1038.58
   1  -1 -12 2733.58  427.68
   1   1 -12 1582.23  718.19
  -1   1  12 1995.26  743.08
  -1  -1  12 1651.74  801.06
   1  -1 -1114392.25  747.59
   1   1 -1115070.46  911.34
  -1  -1  1112343.88 1250.53
  -1   1  1113737.66 1210.64
   1  -1 -10  349.59  310.03
   1   1 -10  431.12  420.53
  -1   1  10  750.18  614.88
  -1  -1  10  230.83  630.46
   1   1  -9  830.80  439.92
   1  -1  -9  858.02  456.02
  -1  -1   9  733.19  374.31
  -1   1   9  781.17  683.85
   1  -1  -8  177.74  365.06
   1   1  -8  358.38  519.39
  -1   1   8  372.84  592.34
  -1  -1   8  267.21  574.09
  -1   1   8  138.76  163.42
   1  -1  -726057.01 1104.40
   1   1  -724212.03 1102.82
  -1   1   723909.73  872.63
  -1   1   724402.95 1583.16
  -1  -1   725815.51 1541.44
  -1  -1   722685.14  852.11
   1  -1  -6 1591.78  344.10
   1   1  -6 1669.55  566.53
  -1  -1   6 1138.83  386.35
  -1   1   6  873.25  679.85
  -1   1   6  507.85  241.09
  -1  -1   6 1001.79  256.00
   1   1  -524405.09 1406.86
   1  -1  -524849.88  952.25
  -1   1   523017.20  821.35
  -1   1   524897.10 1727.27
  -1  -1   522629.26 1054.51
  -1  -1   523978.62 1596.46
   1  -1  -425428.98  926.30
   1   1  -423310.26 1232.25
   1  -1  -423339.32 1608.37
   1   1  -423944.08 1470.14
  -1   1   424682.85 1891.57
  -1   1   425581.95  939.13
  -1  -1   426120.42 1368.95
  -1  -1   428557.11 1884.95
   1   1  -3251408.112704.85
   1   1  -229480.91 1318.50
   1  -1  -234817.49 2531.15
   1   1  -227956.40 1023.70
  -1   1   228438.85  835.94
  -1  -1   230843.00 1419.28
  -1  -1   232017.50 1236.41
  -1   1   233575.52 1729.37
   1  -1  -130441.63 1338.24
   1   1  -130826.77 1096.37
   1   1  -130442.61  989.11
   1  -1  -129933.52  865.53
  -1   1   129603.31  949.86
  -1  -1   129880.34  968.11
  -1  -1   129364.36 1289.33
  -1   1   129437.01 1146.09
   1  -1   020282.01  658.10
   1   1   020136.40  676.01
   1  -1   020999.18  845.20
   1   1   019797.85  696.55
  -1  -1   018822.55  624.48
  -1   1   024170.76  956.35
  -1  -1   019181.39  711.93
  -1   1   019570.46  747.46
   1  -1   2 4101.28  468.09
   1  -1   2 5380.48  845.45
   1   1   2 4142.45  441.18
   1   1   2 4656.05  439.49
  -1  -1  -2 5190.60  374.66
  -1   1  -2 4360.61  588.97
  -1   1  -2 3952.30  365.77
  -1  -1  -2 4605.55  495.83
   1   1   320510.61  713.19
   1  -1   322608.58 1787.78
   1   1   321900.02 1594.10
   1  -1   319746.06 1021.12
  -1  -1  -320623.40 1277.59
  -1   1  -319446.58 1317.88
  -1   1  -320131.46 1261.77
  -1  -1  -320738.06 1115.41
   1  -1   412067.15  824.73
   1  -1   411879.63  780.50
   1   1   414061.74 1069.65
   1   1   411746.15  707.66
  -1   1  -414982.78 1251.15
  -1  -1  -415477.81 1059.27
  -1  -1  -412498.30  787.83
  -1   1  -412322.43  970.19
   1  -1   5 4880.52  844.80
   1   1   5 5762.83  734.20
  -1  -1  -5 4593.40  580.66
  -1   1  -5 4324.66  709.42
   1  -1   651056.23 2814.14
   1   1   648852.98 2559.22
  -1   1  -650998.28 2739.92
  -1  -1  -649925.71 2440.43
   1  -1   7 7902.65  951.20
   1   1   7 8218.99  871.46
  -1  -1  -7 7727.87  674.60
  -1   1  -7 7700.02  775.40
   1   1   868965.14 3646.07
   1  -1   872568.64 4061.61
  -1   1  -865466.11 3489.64
  -1  -1  -863658.97 3222.68
   1  -1   9  645.55  723.54
   1   1   9  985.92  679.00
  -1  -1  -9 1065.24  470.74
  -1   1  -9 1359.42  582.29
   1   1  10  146.45  557.15
   1  -1  10 -200.81  615.89
  -1   1 -10  137.06  479.35
  -1  -1 -10 -156.93  381.52
   1  -1  11 4303.24  926.44
   1   1  11 7222.17  918.42
  -1   1 -11 5123.57  730.97
  -1  -1 -11 4932.96  641.72
   1   1  12 -174.41  630.68
   1  -1  12   54.87  643.44
  -1  -1 -12  468.93  453.76
  -1   1 -12  -16.03  679.44
   1   1  13 1411.18  772.88
   1  -1  13  973.58  805.51
  -1  -1 -13 1820.02  566.80
  -1   1 -13 1135.28  625.87
   1   1  14   29.84  715.51
   1  -1  14 -130.24  751.24
  -1   1 -14 -436.63  562.94
  -1  -1 -14  171.62  687.33
   1   1  15 5109.09 1130.90
   1  -1  15 3830.24 1128.69
  -1   1 -15 3723.69  830.29
  -1  -1 -15 4242.61  767.04
   1   1  16  872.43  959.72
   1  -1  16 1178.06  977.34
  -1  -1 -16 1491.19  690.40
  -1   1 -16 1044.85 1024.64
   1  -1  1757926.67 3827.02
   1   1  1759640.42 3809.56
  -1  -1 -1760921.05 3326.36
  -1   1 -1759365.16 3481.72
   1   1  18 -873.37  867.24
   1  -1  18 1194.38  958.76
  -1  -1 -18 -100.18  613.37
  -1   1 -18  735.98  711.81
   1   1  1922346.84 2125.48
   1  -1  1926744.55 2357.16
  -1  -1 -1922695.97 1742.39
  -1   1 -1920200.36 1795.83
   1  -1  20  259.28  957.96
   1   1  20  -78.88  890.52
  -1   1 -20 -369.99  716.47
   1  -1  21 4601.09 1409.76
   1   1  21 5104.44 1373.41
   1   1  22 3210.95 1452.28
   1  -1  22 5870.64 1503.79
  -1  -3  22-1259.37  959.22
  -1   3  22  -70.92  938.36
  -1  -3  21  681.75  911.08
  -1   3  21  211.17  902.43
  -1   3  20 -333.19  892.44
  -1  -3  20 1519.58  929.59
  -1  -3  1921148.27 1984.51
  -1   3  1920902.94 1886.18
   1   3 -18 4619.56 1037.24
  -1  -3  1811324.08 1418.71
  -1   3  18 4994.99 1240.79
   1   3 -1737403.58 2403.50
  -1  -3  1738397.22 2687.63
  -1   3  1737027.23 2529.80
   1   3 -16 1059.35  737.66
   1  -3 -16  910.44  444.28
  -1   3  16 1313.75  840.62
  -1  -3  16 1718.84  919.01
   1   3 -1590047.43 4705.90
   1  -3 -1585135.45 3688.80
  -1   3  1585088.51 4634.63
  -1  -3  1580010.06 4706.63
   1   3 -1421337.87 1709.75
   1  -3 -1420249.40 1351.59
  -1   3  1428578.83 1952.19
  -1  -3  1427612.14 2136.20
   1   3 -13 1278.80  889.04
   1  -3 -13 1403.96  371.80
  -1   3  13 1336.16  711.61
  -1  -3  13 1247.43  458.56
   1   3 -12 2971.59  803.53
   1  -3 -12 5566.14  495.55
  -1   3  12 8117.39  967.53
  -1  -3  12 4595.67 1007.08
   1   3 -11 3992.03  713.72
   1  -3 -11 3804.27  562.37
  -1  -3  11 4307.55  520.44
  -1   3  11 5563.11  868.73
   1  -3 -10  874.80  396.25
   1   3 -10  910.33  590.05
  -1  -3  10  343.55  704.49
  -1   3  10 2038.68  657.04
   1   3  -9110660.6 5198.76
   1  -3  -9112111.2 4681.06
  -1   3   9110215.1 5522.71
  -1  -3   9112094.1 5647.40
   1  -3  -8  211.94  355.65
   1   3  -8  376.11  745.67
  -1  -3   8  691.91  646.71
  -1   3   8  151.37  630.79
   1   3  -7417369.725137.81
  -1   3   7424397.726417.96
  -1  -3   7404591.125036.84
   1  -3  -633489.77 1392.90
   1   3  -639719.36 2404.68
  -1   3   636547.56 2150.63
  -1  -3   640081.24 2178.45
   1  -3  -5 1939.27  381.81
   1   3  -5 2337.89  612.89
   1  -3  -5 2951.39  397.55
  -1  -3   5 2872.47  646.74
  -1   3   5 2344.05  780.26
   1  -3  -420334.78  972.00
   1   3  -423696.29 1799.32
  -1   3   419947.01 1514.60
  -1   3   423756.97 1840.15
  -1  -3   421493.25 1378.97
  -1  -3   425880.38 1887.66
   1  -3  -331238.37 2938.16
   1  -3  -325533.77 1190.62
   1   3  -326553.65 1187.83
   1   3  -327592.85 1572.05
  -1  -3   330351.96 1423.77
  -1  -3   325429.84 1319.74
  -1   3   326179.15 1109.71
  -1   3   327502.41 1478.49
   1  -3  -248426.91 2773.18
   1   3  -245345.37 1806.17
   1   3  -249193.59 2549.60
   1  -3  -248619.96 2243.02
  -1   3   246923.82 1997.71
  -1   3   252498.83 2621.22
  -1  -3   247453.96 2234.27
  -1  -3   249939.87 2012.33
   1  -3   025120.50 1729.71
   1  -3   023787.72 1404.66
   1   3   022660.44 1059.80
  -1   3   023518.80 1908.75
  -1   3   026258.17 1764.48
  -1  -3   027574.67 1205.14
  -1  -3   029020.96 1495.22
   1  -3   126096.11 2833.55
   1  -3   122098.50 1379.45
  -1  -3  -122192.52 1167.69
  -1   3  -123145.29 2082.35
  -1   3  -124942.64 1867.90
  -1  -3  -122826.32 1376.44
   1  -3   2 6163.35  754.55
   1   3   2 7444.47  614.62
   1   3   2 6019.13  369.45
   1  -3   2 6961.07 1829.24
  -1   3  -2 5463.78  905.56
  -1  -3  -2 6413.06  440.15
  -1   3  -2 5472.62 1224.74
  -1  -3  -2 6706.79  465.04
   1  -3   3174692.2 9109.07
  -1  -3  -3158998.5 7291.93
  -1  -3  -3164816.1 7266.04
  -1   3  -3167818.1 8517.06
   1  -3   449707.40 3045.67
   1   3   439594.73 1613.57
  -1   3  -446128.18 2667.51
  -1  -3  -447955.46 2275.53
  -1  -3  -438190.35 1618.01
   1   3   531874.74 1605.60
   1  -3   530804.32 1384.71
  -1   3  -531035.38 1819.26
  -1  -3  -532163.61 1426.05
  -1  -3  -530659.53 1525.43
   1  -3   622796.30 1726.36
   1   3   623387.42 1192.94
  -1  -3  -623567.83 1263.32
  -1   3  -619858.68 1513.46
   1  -3   7 8295.51 1086.22
   1   3   7 8377.93  744.36
  -1   3  -7 8516.28  991.38
  -1  -3  -7 7170.08  630.28
   1   3   869804.47 3441.29
   1  -3   872144.08 4279.82
  -1  -3  -867339.74 3202.80
  -1   3  -866353.20 3907.39
   1  -3   9243679.013955.72
   1   3   9248860.213417.78
  -1   3  -9247699.913863.29
  -1  -3  -9253729.013025.58
   1   3  10 1108.01  783.95
   1  -3  10 1014.67  798.26
  -1   3 -10  681.11  670.42
  -1  -3 -10  798.04  597.03
   1   3  1168527.35 3305.08
   1  -3  1162745.20 3521.07
  -1  -3 -1164880.84 2837.14
  -1   3 -1165515.33 3418.45
   1   3  12 2203.56  741.71
   1  -3  12 2967.97  962.59
  -1   3 -12 1794.17  764.08
  -1  -3 -12 2079.99  545.67
   1   3  13 7512.26  940.60
   1  -3  13 4815.50 1166.50
  -1   3 -13 4212.64 1340.32
  -1  -3 -13 6276.03  678.88
   1  -3  14 1284.14  932.14
   1   3  14  881.50  727.74
  -1  -3 -14  972.26  520.07
  -1   3 -14 -111.55  742.58
   1  -3  15 7039.80 1396.79
   1   3  15 8391.99 1193.27
  -1  -3 -15 9484.21  880.91
  -1   3 -15 6272.80 1181.48
   1   3  16  617.01  845.06
   1  -3  16 1020.02  968.65
  -1   3 -16  270.67  827.93
  -1  -3 -16  916.84  587.14
   1  -3  17 1752.56 1108.34
   1   3  17 2370.42  949.82
  -1  -3 -17 1078.67  909.57
  -1   3 -17 1296.79 1306.05
   1  -3  18 1731.68 1161.12
   1   3  18 1874.50  982.84
  -1  -3 -18 2081.25  679.48
  -1   3 -18  693.27  933.65
   1   3  19  115.74  872.20
   1  -3  19 -137.84 1017.99
  -1  -3 -19 -283.66  626.75
  -1   3 -19-1570.22  852.58
   1   3  20  654.40  935.04
   1  -3  20  406.12 1069.59
  -1   3 -20 1310.89 1272.18
   1   3  2115479.27 1846.92
   1  -3  2115703.45 2036.28
   1   3  22  504.05  989.97
  -1   5  21 -116.74 1034.40
  -1  -5  21 3407.01 1161.43
  -1   5  20 1086.38  859.36
  -1  -5  20  436.30 1026.28
   1   5 -1923489.78 1926.37
  -1   5  1927192.50 2101.32
  -1  -5  1926078.21 2361.67
   1   5 -18 -258.22  755.93
  -1   5  18  712.39  802.90
  -1  -5  18  990.90  888.17
   1   5 -17  316.82  982.28
  -1  -5  17 -305.18  830.76
  -1   5  17  323.93  688.20
   1  -5 -16 7308.22  660.52
   1   5 -16 5246.06 1097.97
  -1   5  16 3114.90 1078.25
  -1  -5  16 5686.17 1257.75
   1  -5 -15 5699.19  576.49
   1   5 -15 5526.21 1056.00
  -1   5  15 5740.66  991.89
  -1  -5  15 4317.40 1152.49
   1  -5 -14  777.57  407.27
   1   5 -14 1105.57  776.34
  -1  -5  14 1946.32  913.82
  -1   5  14 1956.68  748.60
   1   5 -13 9672.24 1170.71
   1  -5 -1312241.45  883.12
  -1  -5  13 9976.74 1297.18
  -1   5  1310900.50 1167.39
   1   5 -12  -62.79  559.05
   1  -5 -12  -72.61  265.97
  -1  -5  12  239.00  645.16
  -1   5  12   79.42  559.34
   1  -5 -11  618.34  415.45
   1   5 -11  349.59  612.81
  -1   5  11  971.56  607.99
  -1  -5  11  500.73  698.58
   1  -5 -10 8607.00  722.48
   1   5 -10 7537.73 1011.95
  -1   5  1010014.48 1007.50
  -1  -5  1010000.32 1146.15
   1  -5  -9  552.86  371.90
   1   5  -9  279.71  591.08
  -1   5   9 -388.51  552.97
  -1  -5   9  392.52  601.65
   1   5  -856987.42 3105.03
   1  -5  -858989.21 2500.50
  -1  -5   861510.69 3481.94
  -1   5   852192.67 2827.54
   1   5  -748878.23 2676.57
   1  -5  -750082.31 1883.07
  -1   5   748984.95 2537.76
  -1  -5   751103.84 2593.79
   1  -5  -6 7204.74  660.25
   1   5  -6 6888.73  911.32
  -1  -5   6 4413.89  855.86
  -1   5   6 5697.08  876.34
   1  -5  -515336.81  748.37
   1   5  -514994.92 1165.83
  -1  -5   516135.83 1048.88
  -1   5   515148.91 1316.79
   1   5  -4 1524.84  613.36
  -1  -5   4 1541.39  489.51
   1  -5  -3 1226.28  719.35
   1   5  -3 1160.69  630.85
   1   5  -3  850.89  373.08
  -1  -5   3  898.02  419.13
  -1   5   3 1212.98  441.56
   1   5  -2 3410.48  778.33
   1   5  -2 4350.98  448.72
   1  -5  -2 3839.60  737.38
  -1  -5   2 6259.16  716.80
  -1   5   2 6136.43  704.92
  -1   5   2 3911.92  438.67
   1   5  -1  844.42  263.64
   1   5  -1  210.85  612.36
   1  -5  -1  595.81  638.44
  -1   5   1 1009.57  347.20
  -1  -5   1  123.25  441.32
  -1   5   1 1025.95  585.54
   1  -5   055970.46 2616.29
   1   5   050602.65 2374.37
  -1   5   050169.75 2465.31
  -1   5   047498.46 2616.05
  -1  -5   041353.27 1461.59
   1  -5   116366.78 1239.07
   1   5   113627.60  439.02
   1   5   114082.54 1146.80
  -1   5  -113628.05 1211.90
  -1  -5  -113550.03  552.34
   1  -5   280713.02 4935.48
  -1  -5  -270987.44 3351.21
  -1   5  -271453.50 3751.62
   1   5   318626.20  728.45
   1   5   318022.28  734.49
   1  -5   317937.47 1464.46
  -1   5  -319111.67 1426.17
  -1  -5  -316360.68 1018.65
   1   5   4  518.73  498.28
   1   5   4  327.63  313.69
   1  -5   4   90.40  677.88
  -1   5  -4  754.41  637.22
  -1  -5  -4  223.64  401.84
   1  -5   5 1103.11  833.12
   1   5   5 2188.48  465.60
  -1   5  -5  473.95  754.81
  -1  -5  -5 1522.84  453.88
  -1  -5  -5 1112.73  504.94
   1   5   612193.79  716.21
   1  -5   610750.79 1399.85
  -1  -5  -611722.48  883.69
  -1   5  -612504.41 1369.21
   1   5   7 5182.23  687.11
   1  -5   7 3911.73 1034.34
  -1  -5  -7 3365.06  555.88
  -1   5  -7 3599.84 1015.58
   1  -5   891646.29 5503.28
   1   5   886299.72 4396.88
  -1  -5  -875157.50 3701.10
  -1   5  -879836.00 5057.06
   1   5   981372.47 3876.46
   1  -5   978359.63 4298.61
  -1  -5  -974638.28 3236.76
  -1   5  -980277.95 4326.88
   1   5  10 8922.90 1061.00
   1  -5  1010718.11 1226.31
  -1   5 -10 7033.69 1205.10
  -1  -5 -10 7356.92  697.36
   1   5  11 4171.73  945.89
   1  -5  11 4132.06 1044.39
  -1  -5 -11 5286.68  584.05
  -1   5 -11 3858.42  989.31
   1  -5  12 2672.41 1026.85
  -1   5 -12 3200.00  977.16
  -1  -5 -12 1829.26  707.51
   1  -5  13 9911.30 1459.56
   1   5  1312403.93 1125.50
  -1  -5 -1311055.26  866.37
  -1   5 -1310786.09 1424.91
   1   5  14 2744.02  825.77
   1  -5  14 1486.39 1113.87
  -1  -5 -14 1926.08  575.32
  -1   5 -14 2796.46 1488.72
   1  -5  1511735.96 1624.21
   1   5  1511352.47 1279.44
  -1  -5 -1511453.57  934.02
  -1   5 -1512600.92 1571.35
   1  -5  16  951.42 1083.14
   1   5  16 1928.96  829.15
  -1  -5 -16 1075.51  594.96
  -1   5 -16 1263.68 1029.73
   1   5  1762696.12 3760.24
   1  -5  1757429.00 4126.35
  -1   5 -1766560.39 4347.69
  -1  -5 -1760846.63 3127.82
   1  -5  18 -940.24 1008.03
   1   5  18  488.05  847.24
  -1  -5 -18  664.15  550.92
  -1   5 -18  911.99  953.64
   1  -5  19 2842.23 1305.91
   1   5  19 1975.54  986.78
  -1   5 -19 2147.87 1105.34
   1  -5  20 1159.39 1117.03
   1   5  20 -113.76  879.03
  -1   5 -20 1407.53 1011.08
   1  -5  2113852.10 2252.87
   1   5  2122023.75 1955.21
  -1   5 -2116469.18 2667.61
  -1   7  20  587.81  838.08
  -1  -7  20  609.31 1040.13
   1   7 -1916711.31 1859.12
  -1   7  1916639.21 1619.45
  -1  -7  1917840.95 1969.35
   1   7 -18  -15.35  778.00
  -1   7  18 -691.69  950.13
  -1  -7  18  411.41  871.06
   1   7 -1717798.37 1795.63
  -1   7  1717686.05 1549.08
  -1  -7  1718573.05 1970.88
   1   7 -1622103.53 2160.25
  -1   7  1623121.59 1881.42
  -1  -7  1622585.16 2229.99
   1   7 -15  -21.72  809.03
   1  -7 -15  753.25  390.48
  -1  -7  15  607.41  899.66
  -1   7  15  905.26  704.04
   1   7 -14 -453.20  735.24
   1  -7 -14  -24.03  468.35
  -1  -7  14 -579.85  835.51
  -1   7  14  -33.22  662.41
   1  -7 -13 1027.46  389.69
   1   7 -13  786.54  838.32
  -1  -7  13 2328.00  928.09
  -1   7  13 1502.36  729.79
   1  -7 -12 1172.55  515.95
   1   7 -12 1810.11  821.58
  -1  -7  12 1170.91  874.36
  -1   7  12  901.12  676.25
   1  -7 -11 5513.69  650.80
   1   7 -11 6128.91  970.54
  -1  -7  11 6015.17 1011.03
  -1   7  11 3713.40  832.98
   1  -7 -10 2547.11  586.92
   1   7 -10 4045.19  831.83
  -1   7  10 2485.49  688.25
  -1  -7  10 2089.05  854.52
   1  -7  -921621.30 1210.07
   1   7  -921826.16 1553.74
  -1   7   923422.33 1454.79
  -1  -7   921650.37 1580.83
   1  -7  -8  347.78  423.84
   1   7  -8  131.08  605.30
  -1  -7   8 -450.76  565.20
  -1   7   8  464.45  499.19
   1   7  -7 6370.87  912.60
   1  -7  -7 6653.67  536.33
  -1  -7   7 6974.32  895.31
  -1   7   7 7396.55  856.12
   1  -7  -626710.38 1535.27
   1   7  -624437.62 1700.79
  -1  -7   624938.96 1758.72
   1   7  -5 3071.97  725.11
   1  -7  -5 2268.94  480.25
  -1   7   5 2395.65  989.43
  -1  -7   5 1304.48  657.85
   1   7  -4  254.25  619.54
   1  -7  -4  324.58  811.15
  -1  -7   4   -6.91  498.69
  -1   7   4  213.86  440.58
   1   7  -315599.74 1241.11
   1  -7  -316750.10 1588.04
  -1   7   313793.54 1013.15
  -1  -7   315812.18 1059.62
   1   7  -2   11.90  194.13
   1  -7  -2   13.71  414.27
   1   7  -2   82.91  536.02
  -1   7   2  -92.60  504.99
   1  -7  -1 2021.15  507.78
   1   7  -1 2390.85  723.14
   1   7  -1 1704.28  317.77
  -1   7   1 2017.84  654.29
  -1  -7   1 2620.89  666.06
   1   7   0301572.117905.28
   1  -7   0313528.619029.40
  -1   7   0300859.317941.96
   1  -7   1165388.6 8065.03
   1   7   1152189.3 6200.00
   1   7   1160326.4 8051.70
  -1  -7  -1166392.5 6772.73
  -1   7  -1156995.7 8009.89
   1   7   2  419.08  252.40
   1  -7   2  -16.49 1087.38
   1   7   2  617.78  544.83
  -1   7  -2  599.75  678.09
   1   7   3  662.75  253.76
   1  -7   3  702.91 1001.44
   1   7   3  356.30  176.24
  -1   7  -3   75.42  709.18
  -1  -7  -3 1140.44  517.66
   1   7   4  234.72  193.39
   1   7   4  134.19  245.12
   1  -7   4   20.24  890.01
  -1   7  -4  293.36  728.47
  -1  -7  -4  299.59  441.99
   1   7   518576.85  927.01
   1   7   519264.89  929.97
   1  -7   519356.54 1833.65
  -1   7  -516970.21 1576.54
  -1  -7  -516291.13 1009.21
   1   7   6 1547.98  454.77
   1  -7   6 2621.94  893.19
  -1  -7  -6 1891.94  510.66
  -1   7  -6 1915.15  866.14
   1   7   712984.52  710.87
   1  -7   713207.80 1439.98
  -1   7  -710674.23 1309.04
  -1  -7  -712414.68  842.39
   1  -7   8 3635.37 1082.45
   1   7   8 6815.92  710.66
  -1   7  -8 4421.40 1051.61
  -1  -7  -8 5374.23  655.91
   1   7   930934.02 1437.97
   1  -7   930573.04 2244.98
  -1   7  -930307.04 1588.64
  -1  -7  -930981.11 1514.61
   1   7  10  750.24  461.87
   1  -7  10 2109.99  942.21
  -1  -7 -10 2003.03  509.18
  -1   7 -10 1961.02  872.31
   1   7  1125610.55 1382.54
   1  -7  1124443.04 2044.83
  -1  -7 -1125157.11 1321.90
  -1   7 -1121986.74 1983.93
   1  -7  12 3178.56 1174.46
   1   7  12 4259.85  718.90
  -1  -7 -12 2186.45  606.34
  -1   7 -12 2763.91 1119.83
   1  -7  13  198.59  981.07
   1   7  13  605.64  564.51
  -1  -7 -13   59.13  450.78
  -1   7 -13  475.23  892.44
   1   7  1416130.19 1377.58
   1  -7  14 9420.94 1903.34
  -1  -7 -1413393.35 1029.13
  -1   7 -1414198.77 1845.81
   1  -7  15 1399.37 1095.53
   1   7  15  775.42  655.13
  -1  -7 -15  451.07  503.17
  -1   7 -15  504.38 1003.24
   1  -7  16 4107.72 1528.22
   1   7  16 2902.83 1033.18
  -1  -7 -16 6269.00  782.58
  -1   7 -16 6483.54 1393.65
   1  -7  17 1899.94 1249.22
   1   7  17 1006.64  816.71
  -1  -7 -17 1656.75  795.27
  -1   7 -17 1510.48 1136.51
   1   7  18 3116.96 1391.12
   1  -7  18 4298.28 1446.85
  -1   7 -18 3330.38 1303.31
   1   7  19 -308.35  724.30
   1  -7  19  -52.76 1011.03
  -1   7 -19  225.26  905.48
   1   7  2010781.83 1443.47
   1  -7  2012761.67 1323.53
  -1   7 -20 5164.57 1759.94
   1   9 -19 8653.65 1543.91
  -1   9  1911623.15 1366.48
  -1  -9  1913142.20 1868.56
   1   9 -18 -133.91  834.42
  -1   9  18  223.03  672.75
  -1  -9  18  359.65 1008.12
   1   9 -17 1404.07  910.22
  -1   9  17  517.50  719.86
  -1  -9  17  307.94 1066.37
   1   9 -16 3520.53 1106.85
  -1   9  16 2705.14  856.40
  -1  -9  16 2574.18 1263.54
   1   9 -15 1676.86  927.22
  -1  -9  15  601.40 1107.21
  -1   9  15 1788.26  999.42
   1  -9 -14 1188.11  586.41
   1   9 -14  804.73  893.44
  -1  -9  14  675.57 1001.36
  -1   9  14  622.75  705.60
   1   9 -13 3505.96 1207.57
   1  -9 -13 6395.94  621.59
  -1  -9  13 5882.69 1336.10
  -1   9  13 8454.06 1257.15
   1   9 -12   61.92  726.53
   1  -9 -12   65.01  345.95
  -1   9  12    7.85  553.89
  -1  -9  12 -345.55  806.00
   1   9 -11  857.31  795.84
   1  -9 -11  640.37  411.12
  -1   9  11 1089.22  608.26
  -1  -9  11 -131.34  901.24
   1  -9 -1033043.38 1728.13
   1   9 -1030674.35 2212.86
  -1   9  1029245.67 1938.53
  -1  -9  1031524.63 2518.98
   1  -9  -9 7722.63  658.51
   1   9  -9 7847.98 1083.45
  -1  -9   9 9570.60 1580.76
  -1   9   9 6663.36  843.22
   1   9  -817771.48 1486.75
   1  -9  -817545.00 1322.84
  -1   9   815201.68 1647.18
  -1  -9   814300.52 1488.42
   1   9  -730915.38 1972.03
   1  -9  -730579.63 1490.91
  -1   9   730532.62 1712.65
  -1  -9   732715.06 1968.04
   1  -9  -6 3305.74  520.70
   1   9  -6 3024.62  788.95
  -1  -9   6  809.07  686.98
  -1   9   6 1113.68  686.64
   1   9  -5 7801.60  968.23
  -1  -9   5 7213.00 1178.30
  -1   9   5 6070.12  848.07
   1   9  -412462.98  791.97
   1  -9  -4 9995.01 1924.70
  -1   9   413769.07 1088.08
  -1  -9   412300.04 1179.02
   1   9  -311922.74 1136.93
   1  -9  -312152.06 1018.31
  -1   9   310852.54  920.35
  -1  -9   313371.88 1438.37
   1  -9  -2  307.84  607.94
   1   9  -2   73.21  648.52
  -1  -9   2  382.44  648.21
  -1   9   2  907.95  549.06
   1  -9  -151139.85 2245.38
   1   9  -146865.97 2438.35
   1   9  -138711.78 1555.68
  -1  -9   143692.54 1804.37
  -1   9   146199.60 2360.72
   1   9   021014.82 1047.89
   1  -9   024287.96 1713.29
  -1   9   027730.48 1696.76
   1  -9   120867.88 1448.59
   1   9   119989.90 1386.23
   1   9   117064.32  660.65
  -1  -9  -119980.47  876.86
  -1   9  -121418.16 1538.85
   1   9   215928.19 1258.86
   1  -9   213873.94 1255.38
  -1   9  -215447.47 1380.34
   1   9   315681.07  685.64
   1  -9   318087.39 1909.46
  -1   9  -316108.55  930.16
  -1  -9  -319947.71 1211.96
   1  -9   414700.94 1836.47
  -1   9  -422097.37 1657.35
  -1  -9  -420440.33 1327.92
   1  -9   523514.28 2034.12
   1   9   522080.13  953.36
   1   9   518565.76  783.34
  -1  -9  -521778.71 1264.82
  -1   9  -520313.28 1617.79
   1   9   6  844.08  354.81
   1  -9   6  341.33  876.81
  -1   9  -6  567.52  731.84
  -1  -9  -6  693.42  471.57
   1   9   7 2005.07  453.86
   1  -9   7 4456.06 1079.19
  -1   9  -7 2738.43  958.66
  -1  -9  -7 2912.39  595.50
   1   9   8    9.16  399.34
   1  -9   8 -265.37  812.33
  -1  -9  -8   33.37  413.16
  -1   9  -8  645.95  729.77
   1   9   9  138.14  323.32
   1  -9   9  358.65  900.69
  -1   9  -9  230.76  819.17
  -1  -9  -9  905.24  475.81
   1  -9  1019971.91 2183.65
   1   9  1018673.71 1278.14
  -1   9 -1019291.69 2033.04
  -1  -9 -1019572.64 1613.09
   1  -9  1190827.28 6024.38
   1   9  1197875.94 4944.91
  -1  -9 -1190648.47 4473.11
  -1   9 -1195328.67 5948.42
   1  -9  12 2989.80 1407.33
   1   9  12 3417.12  708.31
  -1   9 -12 5299.64 1300.60
  -1  -9 -12 6424.52  734.18
   1   9  13   -0.81  477.56
   1  -9  13  536.48  983.89
  -1   9 -13  439.98  896.64
  -1  -9 -13   17.91  433.22
   1   9  14 1113.87  592.01
   1  -9  14  754.40  667.76
  -1  -9 -14 1045.61  555.05
  -1   9 -14 1671.94 1064.47
   1   9  15 -373.40  559.34
   1  -9  15 -360.51 1012.29
  -1   9 -15 -997.31  974.33
  -1  -9 -15  103.51  490.46
   1   9  16 1551.30  765.92
   1  -9  16 1638.80 1237.16
  -1   9 -16 1835.89 1162.15
  -1  -9 -16 1696.34  832.27
   1  -9  17 1394.79 1232.25
  -1  -9 -17 2855.38  838.37
  -1   9 -17  593.40 1159.38
   1  -9  18  820.83 1092.02
  -1   9 -18 -238.87  991.99
   1  -9  19  435.89 1052.91
  -1   9 -19 -162.61  973.20
   1  11 -18 1724.36 1022.45
  -1 -11  18  485.82 1165.62
   1  11 -17  -32.39  909.49
  -1 -11  17 1065.28 1053.74
   1  11 -16  841.63  962.40
  -1 -11  16 1021.75 1068.34
   1  11 -1513138.63 1674.17
  -1 -11  1514879.81 1906.02
   1  11 -14  -97.27  811.24
  -1 -11  14  353.98  923.10
  -1  11  14 -408.54  594.48
   1 -11 -1352513.20 2542.38
   1  11 -1347153.86 3407.34
  -1 -11  1354536.21 3797.41
  -1  11  1347955.64 3295.92
   1  11 -12  953.14  942.35
   1 -11 -12 2163.80  545.95
  -1 -11  12  288.31 1069.56
  -1  11  12  840.18  667.17
   1 -11 -1121278.11 1340.70
   1  11 -1122358.28 1993.60
  -1  11  1125647.23 1667.48
  -1 -11  1123930.30 2068.05
   1  11 -1024507.44 2272.12
   1 -11 -1024019.10 1530.87
  -1 -11  1021650.63 2293.45
  -1  11  1021940.12 1686.51
   1  11  -9155513.1 9365.43
   1 -11  -9158332.5 8626.09
  -1  11   9157022.2 8504.34
  -1 -11   9155066.1 9415.64
   1 -11  -8237940.513677.18
   1  11  -8218952.312804.54
  -1  11   8218348.413423.56
  -1 -11   8229850.114793.26
   1  11  -7 7631.09 1193.06
   1 -11  -7 6886.44  849.10
  -1  11   7 8778.67 1170.69
  -1 -11   7 9230.31 1279.55
   1 -11  -618576.29 1266.23
   1  11  -618430.39 1619.47
  -1  11   614149.43 1695.03
  -1 -11   614289.29 1697.93
   1  11  -510439.68 1215.93
  -1 -11   510712.86 1221.99
  -1  11   5 9084.27  983.70
   1 -11  -4 3875.00 1167.45
   1  11  -4  881.36  418.41
  -1  11   4  880.86  660.24
  -1 -11   4  617.10 1037.88
   1  11  -3 1842.96  827.21
   1 -11  -3 1185.63  654.52
  -1 -11   3 2139.78  557.88
  -1  11   3 1987.99  659.11
   1 -11  -2  434.84  523.85
   1  11  -2  686.14  670.22
  -1  11   2 1136.21  629.75
  -1 -11   2  607.06  456.36
   1 -11  -1   32.21  410.82
   1  11  -1  264.53  584.81
  -1  11   1  165.11  587.30
  -1 -11   1  -76.60  355.42
   1 -11   0 1578.85  562.90
   1  11   0 6816.73  777.04
  -1 -11   0 2140.97  485.20
  -1  11   0 3450.82  811.93
   1 -11   1 1434.13  708.26
   1  11   1 1331.36  724.95
  -1 -11  -1 1339.09  351.62
  -1  11  -1 1297.63  708.48
   1  11   2  -67.23  604.90
   1 -11   2  263.06  464.71
  -1  11  -2  694.16  636.56
  -1 -11  -2  135.02  376.14
   1 -11   3 4296.27  806.80
   1  11   3 4940.85  501.90
  -1 -11  -3 4135.19  850.63
  -1  11  -3 4411.27  975.79
   1  11   4  652.53  281.00
   1 -11   4  -96.10 1132.35
  -1  11  -4 1879.42  791.65
  -1 -11  -4 1607.19  625.69
   1 -11   515264.26 1716.63
   1  11   514153.88  776.05
  -1 -11  -517096.01 1215.34
  -1  11  -514619.61 1469.36
   1 -11   617869.77 3034.63
   1  11   618845.02 1054.39
  -1  11  -621237.07 1875.79
  -1 -11  -620946.83 1400.38
   1  11   7  262.60  338.33
   1 -11   7  862.16 1148.53
  -1  11  -7 -106.08  837.29
  -1 -11  -7  761.95  558.95
   1 -11   8103088.2 8797.81
  -1 -11  -897032.27 5402.72
  -1  11  -889001.73 5957.28
   1 -11   9  992.94 1259.68
  -1 -11  -9 1843.86  889.40
  -1  11  -9 2103.11 1074.40
   1 -11  1054200.18 4833.83
  -1 -11 -1047920.67 3296.17
  -1  11 -1051122.02 3942.71
   1 -11  1140529.77 3524.15
  -1  11 -1136205.97 3041.26
  -1 -11 -1136380.20 2452.67
   1 -11  1221557.91 2664.88
  -1  11 -1220127.14 2335.61
  -1 -11 -1222015.61 1584.37
   1 -11  1319372.25 2453.50
  -1  11 -1322660.75 2319.48
  -1 -11 -1322199.65 1431.09
   1 -11  14 2917.27 1403.92
  -1 -11 -14 3374.51  691.37
  -1  11 -14 1925.78 1243.87
   1 -11  15 5217.23 1714.90
  -1 -11 -15 8011.36  885.70
  -1  11 -15 7728.85 1558.87
   1 -11  16  372.58 1117.84
  -1  11 -16 1151.45 1046.88
  -1 -11 -16  396.83  558.37
   1 -11  17  538.33 1145.56
  -1  11 -17  123.06 1000.46
   1 -11  18 1409.47 1332.29
  -1  11 -18 1312.07 1195.94
   1  13 -16  378.45  935.50
  -1 -13  16 -190.52  982.13
   1  13 -15  935.39 1043.36
  -1 -13  15 1700.10 1159.88
   1  13 -14 1693.70 1079.67
  -1 -13  14 1194.59 1137.50
   1  13 -1330675.08 2543.27
  -1 -13  1326068.08 2577.07
   1  13 -12 1196.56  925.83
   1 -13 -12  446.29  548.66
  -1 -13  12 -339.75  987.12
   1 -13 -11  200.31  507.88
   1  13 -11  154.55  817.63
  -1 -13  11  147.80  924.82
   1 -13 -1017337.09 1303.20
   1  13 -1019765.65 1951.65
  -1 -13  1014695.39 2090.14
   1  13  -9  457.59  788.18
   1 -13  -9  258.65  731.86
  -1 -13   9 -564.82  860.40
   1  13  -8 1278.03  819.76
   1 -13  -8 -551.69  792.11
  -1 -13   8  450.18 1348.86
   1  13  -7  802.58  874.54
   1 -13  -7 1201.16  684.94
  -1 -13   7  840.89 1054.99
   1  13  -6 5602.71 1173.51
   1 -13  -6 5731.12  885.90
  -1 -13   6 4432.46 1264.85
  -1  13   6 4329.52 1091.17
   1  13  -5 4110.71 1108.44
   1 -13  -5 4409.70  563.41
  -1 -13   5 4797.39  990.16
  -1  13   5 2361.30  774.79
   1  13  -4 1277.77  836.97
  -1  13   4 -236.45  699.34
   1  13  -3 4501.20  613.64
   1 -13  -3 2858.50 1336.65
  -1  13   3 3685.89  946.49
   1  13  -2 3217.04  884.72
   1 -13  -2 1256.75 1024.36
  -1  13   2 2865.54  810.43
   1 -13  -1 1084.43  621.05
   1  13  -1 1932.33  773.26
  -1  13   1 2318.96  806.79
   1 -13   0  711.92  760.33
   1  13   0  918.48  769.98
  -1  13   0  583.30  814.58
   1 -13   1  -61.35  707.89
   1  13   1 -310.81  699.08
  -1  13  -1 -370.93  773.67
   1 -13   2    4.41  700.72
   1  13   2  400.96  715.22
  -1  13  -2  230.26  702.69
   1 -13   3 -167.25  737.91
  -1 -13  -3  216.22  669.54
  -1  13  -3  180.93  712.50
   1 -13   4  443.35  688.47
  -1  13  -4 1013.71  803.53
  -1 -13  -4  832.62  717.65
   1 -13   519994.23 1863.65
  -1  13  -520156.48 1831.84
  -1 -13  -519225.67 1557.92
   1 -13   6  445.31  933.30
  -1  13  -6 1207.49  819.26
  -1 -13  -6 -567.01  588.72
   1 -13   7 6256.94 2065.72
  -1  13  -7 5022.14 1270.70
  -1 -13  -7 5072.57  901.98
   1 -13   828085.67 3407.99
  -1 -13  -830019.78 2091.66
  -1  13  -830510.00 1936.61
   1 -13   9 1777.10 1342.36
  -1 -13  -9  180.34  653.36
  -1  13  -9 1713.06  940.44
   1 -13  10 2578.93 1633.90
  -1  13 -10 4678.54 1222.15
  -1 -13 -10 3736.64  846.65
   1 -13  11 3632.83 1548.66
  -1  13 -11 1908.07 1199.09
  -1 -13 -11 3538.74  810.95
   1 -13  12 2398.47 1463.44
  -1  13 -12 3776.76 1173.22
  -1 -13 -12 2342.19  767.76
   1 -13  13 5602.85 1820.08
  -1  13 -13 4213.60 1448.35
  -1 -13 -1310038.19  992.35
   1 -13  14 2011.53 1319.93
  -1 -13 -14  974.48  660.04
  -1  13 -14 1738.78 1105.68
   1 -13  15 3933.10 1631.74
  -1 -13 -15 2164.75  990.60
  -1  13 -15 4197.69 1259.16
   1 -13  16 1648.44 1464.48
  -1  13 -16  555.67 1126.13
   1  15 -14 1256.47 1059.97
   1  15 -13 2356.47 1116.83
   1  15 -12 2538.57 1187.24
   1 -15 -11 -404.43  597.09
   1  15 -11  -57.57  887.97
   1 -15 -10 1970.63  711.97
   1  15 -10 1119.55 1032.55
   1  15  -9  543.15  882.88
   1 -15  -9  271.06  660.92
   1 -15  -8 1720.25 1072.23
   1  15  -8 2374.95 1012.99
   1 -15  -726945.67 1952.91
   1  15  -722309.33 2235.68
   1  15  -6  616.87  874.84
   1 -15  -6  340.81  745.42
   1 -15  -5  331.62  845.68
   1  15  -5 1195.64  856.36
   1 -15  -4  -82.36  433.90
   1  15  -4  844.62  758.01
   1  15  -3 9251.71 1235.49
  -1  15   310226.89 1297.46
   1  15  -2  885.47  728.47
  -1  15   2 -236.37  750.52
   1  15  -1 7646.73 1218.51
  -1  15   1 5858.85 1104.79
   1  15   012696.72 1533.98
  -1  15   014391.66 1533.87
   1  15   1 4114.14 1191.73
  -1  15  -1 7196.76 1197.66
  -1  15  -241193.62 3076.41
  -1 -15  -233871.70 2100.15
  -1 -15  -3  145.18  798.52
  -1  15  -3  187.16  808.72
  -1 -15  -4  947.52  786.16
  -1  15  -4  -49.56  833.63
  -1  15  -510795.60 1448.17
  -1 -15  -510857.92 1411.13
  -1  15  -6  336.00  468.82
  -1 -15  -6  165.75  741.42
   1 -15   716490.62 1903.48
  -1 -15  -719052.84 1658.73
  -1  15  -718165.84 1865.46
   1 -15   8-1003.37  977.77
  -1 -15  -8 -253.98  755.09
  -1  15  -8-1152.54  904.52
   1 -15   9 -217.82 1053.57
  -1 -15  -9  964.44  738.92
  -1  15  -9  728.01  965.14
   1 -15  10   14.88 1223.41
  -1  15 -10 2316.47 1073.62
  -1 -15 -10 1276.02  774.07
   1 -15  11 5302.98 1817.62
  -1  15 -11 5797.41 1465.42
  -1 -15 -11 7686.84 1055.64
   1 -15  12  829.89 1320.35
  -1  15 -12 -626.13 1031.90
  -1 -15 -12 1203.21  681.47
   1 -15  13  507.68 1359.40
  -1 -15 -13  968.71  665.08
  -1  15 -13  -96.01 1078.21
   1 -17 -10  127.77  619.60
   1  17 -10 -266.23  876.26
   1 -17  -9 1619.78  860.38
   1  17  -9 1702.52  660.57
   1 -17  -8 -377.90  736.98
   1  17  -8 1413.88  908.58
   1  17  -7 7908.46 1321.19
   1 -17  -7 6167.81 1210.46
   1  17  -6 1049.08  836.37
   1 -17  -6 -454.13  796.89
   1 -17  -5 -761.90  779.81
   1  17  -5  721.62  725.17
   1  17  -4  917.67  866.38
   1 -17  -4 2199.19 1032.13
   1  17  -3 -831.71  699.38
  -1  17   3  968.32  741.01
   1  17  -2  998.19  987.36
  -1  17   2 3765.78 1010.81
   1  17  -1 2209.76 1007.82
  -1  17   1 2893.74 1038.57
   1  17   0  926.49  953.08
  -1  17   0 2108.96  872.12
  -1  17  -1  198.44  759.32
  -1 -17  -1 -592.52  548.07
  -1  17  -2  -78.48  864.00
  -1 -17  -2 1463.58  984.67
  -1 -17  -3 8461.48 1262.16
  -1  17  -3 -443.51 1155.57
  -1  17  -4   29.77  990.73
  -1 -17  -4 2583.19 1001.66
  -1 -17  -5 9440.75 1265.29
  -1  17  -5-1303.34 1327.87
  -1  17  -6  977.25 1108.86
  -1 -17  -6 5241.28 1054.05
  -1  17  -7 5174.23 1288.84
  -1 -17  -7 5802.62 1150.13
  -1 -17  -8 3361.66  968.14
  -1  17  -8  911.37 1055.22
  -1  17  -9 8110.39 1346.83
  -1 -17  -9 3166.83 1136.97
  -1 -17 -10 1087.87  728.64
  -1  17 -10 -913.12  920.82
   1 -19  -3 2815.53 1306.14
   1  19  -2  935.67  950.40
   1 -19  -2-1461.48  626.02
   1  19  -1  585.02  967.34
  -1  19   1 1891.22 1000.07
  -1  19   0  436.06  992.23
  -1 -19   0 1593.77  685.10
  -1  19  -1   83.66  909.32
  -1 -19  -1  659.44 1065.53
  -1 -19  -2 5772.59  886.71
  -1  19  -2 2725.80 1177.21
  -2   0  2219219.92 2006.31
  -2   0  21  663.86  928.36
  -2   0  20  214.85  870.10
  -2   0  19  523.47  888.13
  -2   0  18110097.5 6421.43
  -2   0  17  411.46  823.41
   2   0 -16273618.915621.83
  -2   0  16259018.015935.56
   2   0 -15  369.52  565.17
  -2   0  15  335.34  753.34
   2   0 -14 2230.82  655.76
  -2   0  14 2177.28  806.71
   2   0 -13  718.89  455.00
  -2   0  13  -79.45  661.83
   2   0 -12 2519.98  527.63
  -2   0  12 2443.85  790.76
   2   0 -11   96.25  385.91
  -2   0  11  452.59  647.59
   2   0 -10 1352.71  449.43
  -2   0  10 1570.67  722.83
   2   0  -9  -53.80  362.41
  -2   0   9  191.45  643.66
  -2   0   9  271.68  193.91
   2   0  -842290.80 1639.60
  -2   0   840832.61 2326.01
  -2   0   836814.82 1229.77
   2   0  -7  -49.85  256.58
  -2   0   7   -4.11  150.02
  -2   0   7   94.21  566.96
   2   0  -615791.35  591.42
  -2   0   616762.52  516.16
  -2   0   615632.33 1365.90
   2   0  -5   -2.25  206.62
  -2   0   5   69.47  145.35
  -2   0   5  387.07  656.35
   2   0  -425613.30  749.75
  -2   0   423377.29  694.82
  -2   0   421837.76 1811.33
  -2   0   3  518.29  912.11
  -2   0   3  -42.10  195.82
  -2   0   3   -1.70  137.08
  -2   0   3  482.08  854.63
   2   0  -1  158.04  271.74
   2   0  -1  381.14  665.02
  -2   0   1  381.34  464.48
  -2   0   1  677.31  328.74
   2   0   1 1153.70  353.82
   2   0   1 2040.91  793.13
  -2   0  -1  838.13  903.98
  -2   0  -1  516.38  454.97
   2   0   3 1840.48 1002.33
  -2   0  -3  309.52  611.94
  -2   0  -3 1342.86  606.37
   2   0   5 -414.82  590.92
  -2   0  -5  -48.70  468.31
   2   0   6 7941.84  880.05
  -2   0  -6 5989.49  719.57
   2   0   7 -570.92  577.40
  -2   0  -7  -35.11  457.32
   2   0   8 4831.22  907.19
  -2   0  -8 5260.63  697.70
   2   0   9 -173.46  610.21
  -2   0  -9  231.41  474.07
   2   0  10155973.3 8143.60
  -2   0 -10151013.9 7455.19
   2   0  11  -69.81  662.47
  -2   0 -11  424.92  500.13
   2   0  12 -132.76  671.63
  -2   0 -12  231.70  497.24
   2   0  13 -116.66  667.99
  -2   0 -13   55.35  495.08
   2   0  14163598.0 9659.51
  -2   0 -14173382.1 9253.49
   2   0  15  163.72  855.80
  -2   0 -15  248.20  657.77
   2   0  1654991.93 3693.08
  -2   0 -1654720.78 3185.10
   2   0  17 -168.92  937.90
  -2   0 -17 -203.09  657.63
   2   0  1841702.24 3130.43
  -2   0 -1838632.99 2572.81
   2   0  19  207.70  930.03
  -2   0 -19 -228.26  694.93
   2   0  2040651.59 3201.93
  -2   0 -2036932.70 2687.28
   2   0  21 -249.89  986.84
  -2   0 -21  112.98  756.57
  -2  -2  2216455.68 1912.75
  -2   2  2215244.43 1241.76
  -2   2  21 -594.73  512.83
  -2  -2  21  -60.08  533.75
  -2   2  20   89.90  805.74
  -2  -2  20  188.28  838.60
  -2  -2  19  693.68  863.01
  -2   2  19   68.71  866.07
  -2  -2  1818514.52 1820.23
  -2   2  1820126.71 1817.14
   2   2 -1713931.82 1566.43
  -2   2  1716577.61 1714.69
  -2  -2  1719211.62 1848.25
   2   2 -16 9194.23  921.53
  -2   2  16 9497.61  838.34
  -2  -2  1610273.71 1321.22
   2  -2 -15  330.32  462.68
   2   2 -15  342.48  517.43
  -2   2  15 1219.81  804.01
  -2  -2  15 1016.04  788.56
   2  -2 -1422530.52 1001.33
   2   2 -1424024.15 1651.63
  -2   2  1421382.19 1697.29
  -2  -2  1423562.32 1762.61
   2   2 -13 2097.59  674.88
   2  -2 -13  842.76  412.74
  -2  -2  13  573.72  735.89
  -2   2  13 1016.96  760.33
   2   2 -12 1967.19  522.87
   2  -2 -12 3558.39  450.55
  -2   2  12 4254.89  840.01
  -2  -2  12 3322.70  784.35
   2  -2 -11  159.40  275.98
   2   2 -11  136.06  502.24
  -2   2  11 -576.73  613.15
  -2  -2  11  285.37  556.70
   2  -2 -10  194.92  271.48
   2   2 -10  125.48  371.12
  -2   2  10  844.36  648.58
  -2   2  10  271.75  175.85
  -2  -2  10   86.99  584.86
   2   2  -930829.89 1442.02
   2  -2  -929800.06 1180.31
  -2   2   936376.95 2249.72
  -2  -2   937181.89 2240.77
   2  -2  -8 5279.54  321.07
   2   2  -8 4415.42  757.15
  -2   2   8 4396.98  983.26
  -2   2   8 4303.64  256.13
  -2  -2   8 5451.86  886.58
   2  -2  -7 6667.26  306.15
   2   2  -7 7419.56  780.72
  -2  -2   7 9100.97  970.87
  -2  -2   7 6447.21  399.01
  -2   2   7 5103.72 1068.61
   2  -2  -682024.67 2576.66
   2   2  -679863.37 3347.45
  -2   2   676555.84 4020.59
  -2  -2   676158.38 3620.50
  -2  -2   672501.01 2873.75
   2   2  -535606.74 1443.83
   2  -2  -536466.91 1065.35
  -2   2   540727.09 2649.48
  -2  -2   544450.31 2269.62
  -2  -2   534597.21 1322.68
   2   2  -410875.79  864.34
   2  -2  -4 9695.07  330.46
   2  -2  -4 9369.45  328.22
  -2  -2   4 9526.67  725.01
  -2   2   411124.51 1479.07
  -2  -2   410109.24  978.17
   2  -2  -316534.54  623.99
   2  -2  -325559.98 2604.28
   2   2  -317834.47  901.96
  -2  -2   322975.15 1672.07
  -2  -2   316858.64  796.98
  -2   2   316866.01  656.15
   2  -2  -247476.44 1783.85
   2   2  -245592.67 2187.12
   2   2  -244508.42 2218.92
   2  -2  -251023.86 3157.56
  -2  -2   246525.83 1863.59
  -2   2   247585.23 2046.21
  -2  -2   243018.91 2636.07
  -2   2   246007.19 2299.83
   2  -2  -1  564.47  797.46
   2  -2  -1   79.42  425.22
  -2  -2   1  544.69  519.49
  -2   2   1  507.41  659.05
  -2  -2   1  174.32  422.87
  -2  -2   1  127.74  350.41
  -2  -2   1  581.92  408.87
  -2   2   1  307.19  534.25
   2  -2   1 1886.13  511.14
   2   2   1 2585.44  552.63
   2  -2   1 4145.01 1421.55
   2   2   1 2523.25  442.30
  -2  -2  -1 3359.73  973.41
  -2   2  -1 3212.13 1360.63
  -2   2  -1 1930.79  760.26
  -2  -2  -1 2688.58  656.15
   2   2   326803.09 1319.51
   2  -2   329457.95 2720.62
  -2   2  -329140.89 1923.83
  -2  -2  -323225.80 1214.13
  -2  -2  -324478.75 1108.70
   2  -2   575324.69 4349.95
   2   2   570658.74 3351.45
  -2  -2  -572083.60 3501.10
  -2   2  -569325.52 3844.38
   2   2   648904.16 2570.03
   2  -2   648922.66 2730.78
  -2  -2  -646874.74 2086.83
  -2   2  -649898.28 2430.80
   2  -2   7 1452.98  848.89
   2   2   7 2179.96  814.61
  -2   2  -7 1257.77  694.03
  -2  -2  -7 1335.57  511.35
   2  -2   813806.66 1453.44
   2   2   814547.99 1093.75
  -2  -2  -813761.82  965.78
  -2   2  -814223.81 1207.89
   2   2   9 4561.69  791.40
   2  -2   9 3170.77 1002.21
  -2   2  -9 2792.90  807.48
  -2  -2  -9 4523.00  672.16
   2  -2  10119320.3 6395.98
   2   2  10124781.4 6117.47
  -2  -2 -10122601.4 5701.00
  -2   2 -10124149.9 6125.78
   2   2  11   -5.36  574.33
   2  -2  11  484.90  707.34
  -2  -2 -11  588.43  454.77
  -2   2 -11 -112.90  551.72
   2  -2  12 1565.56  913.48
   2   2  12 1869.90  763.33
  -2   2 -12 2541.93  720.58
  -2  -2 -12 2570.42  591.68
   2   2  13 2542.67  825.64
   2  -2  13 1464.54  977.93
  -2  -2 -13 1695.66  853.70
  -2   2 -13 1085.38  785.24
   2  -2  14 -320.01  831.06
   2   2  14  -73.80  680.79
  -2  -2 -14   26.09  501.52
  -2   2 -14  371.80  633.70
   2  -2  15 5981.63 1586.88
   2   2  1510156.42 1360.58
  -2   2 -15 8728.82 1237.13
  -2  -2 -15 9818.06 1075.39
   2   2  1683398.43 5003.01
   2  -2  1680263.21 5157.25
  -2  -2 -1683157.82 4345.99
   2   2  17 1247.49 1086.35
   2  -2  17 2054.69 1195.93
  -2  -2 -17 3859.07 1064.13
  -2   2 -17 1612.80  983.97
   2  -2  18 2079.00 1267.63
   2   2  18 2530.72 1105.37
  -2   2 -18 1381.09 1386.29
  -2  -2 -18 3664.80  816.70
   2   2  19  443.05 1041.34
  -2  -2 -19 1359.81  779.80
  -2   2 -19 1318.75  909.97
   2   2  20  339.90  959.45
   2  -2  20 -309.85 1061.48
  -2   2 -20 -334.60  806.00
  -2  -2 -20 -217.94  690.62
   2  -2  21 3504.93 1504.13
   2   2  21 3997.25 1361.31
  -2   2 -21 4390.06 1188.21
  -2   4  21 1015.65  928.52
  -2  -4  21  798.36  973.84
  -2   4  20 -451.11  783.32
  -2  -4  20  269.70  850.68
  -2  -4  19 2712.98 1116.56
  -2   4  19 2924.08 1078.15
  -2   4  18 8853.82 1278.60
  -2  -4  18 9302.39 1443.39
   2   4 -1716370.35 1479.57
  -2   4  1715607.12 1641.34
  -2  -4  1713881.28 1757.54
   2   4 -1644142.83 2533.93
  -2  -4  1639755.00 2705.34
  -2   4  1639739.43 2623.12
   2   4 -15 -295.53  565.77
  -2   4  15  646.02  748.25
  -2  -4  15  463.42  765.59
   2   4 -14 5118.57  809.86
   2  -4 -14 4662.55  423.79
  -2   4  14 5056.35 1062.16
  -2  -4  14 6545.30 1043.17
   2  -4 -13  -83.27  296.39
   2   4 -13 -533.85  471.14
  -2   4  13 1254.54  596.85
  -2  -4  13  -65.65  616.81
   2  -4 -1220810.49  964.88
   2   4 -1220179.36 1630.92
  -2  -4  1220798.56 1558.17
  -2   4  1220980.92 1600.91
   2  -4 -11  -10.13  257.76
   2   4 -11  344.03  444.26
  -2  -4  11   34.23  564.77
  -2   4  11 -318.43  601.32
   2   4 -10 1361.92  573.19
   2  -4 -10 1754.28  319.13
  -2   4  10 1493.94  711.15
  -2  -4  10 1865.13  687.73
   2   4  -9  170.52  446.69
   2  -4  -9  -39.69  240.90
   2  -4  -9 -127.01  223.13
  -2  -4   9  386.51  527.13
  -2   4   9   62.41  617.43
  -2   4   8962457.682221.20
   2  -4  -7207655.910370.08
   2  -4  -7237886.711429.50
   2   4  -7251714.213371.77
  -2  -4   7273599.515232.36
  -2   4   7251397.415149.60
   2  -4  -6185969.0 8345.64
   2   4  -6204803.2 9866.90
  -2  -4   6198690.8 9802.75
  -2   4   6196749.810767.27
   2  -4  -5 7101.93  496.05
   2  -4  -5 7881.62  496.94
   2   4  -5 8637.36  795.56
  -2  -4   5 9511.79  761.54
  -2   4   5 9862.08 1309.55
   2  -4  -434784.65 1388.93
   2  -4  -442245.30 3028.90
   2   4  -436977.22 1722.06
  -2  -4   434663.32 1468.99
  -2   4   435073.88 1462.05
   2   4  -3  733.33  500.00
   2   4  -3  153.49  444.13
   2  -4  -3  336.24  763.84
   2  -4  -3  357.97  271.95
  -2   4   3  389.46  312.10
  -2  -4   3  278.23  302.81
   2  -4  -217555.33  847.76
   2   4  -219118.00  988.39
   2   4  -215462.90 1036.32
   2  -4  -218324.36 1397.77
  -2   4   217323.86  962.65
  -2  -4   218773.67  892.69
   2  -4  -151467.05 2823.88
   2  -4  -144010.56 1880.22
   2   4  -151664.31 2426.77
  -2  -4   140500.07 1389.60
  -2   4   147865.25 2213.21
   2  -4   0 8114.60  950.23
  -2  -4   0 7349.97  334.00
  -2   4   0 6946.33  886.57
  -2  -4   0 6459.33  257.92
  -2  -4   0 6623.16  483.89
   2  -4   163172.49 3985.15
  -2  -4  -159328.87 2824.86
  -2   4  -159361.25 3263.69
   2  -4   2 4537.51 1117.35
   2   4   2 4206.89  220.59
  -2  -4  -2 4140.29  187.95
  -2   4  -2 4446.86  892.15
  -2  -4  -2 6086.82  639.95
   2  -4   3 -355.05  872.74
   2   4   3  -24.74  185.02
  -2   4  -3  434.19  586.76
  -2  -4  -3   37.04  146.96
  -2  -4  -3 -100.84  403.51
   2   4   4 1509.73  361.89
   2  -4   4 1107.10  984.12
  -2  -4  -4 1468.05  300.92
  -2  -4  -4 1238.83  501.14
  -2   4  -4  825.38  703.18
   2  -4   530365.64 2481.83
   2   4   530359.60 1441.10
  -2   4  -527734.07 2038.17
  -2  -4  -525136.86 1274.18
  -2  -4  -528864.96 1593.70
   2  -4   620055.91 1819.14
   2   4   618887.52 1152.27
  -2   4  -615320.17 1419.50
  -2  -4  -618955.30 1086.36
   2  -4   732303.74 2579.57
   2   4   734953.66 1667.54
  -2  -4  -732439.75 1764.43
  -2   4  -730194.80 2291.23
   2  -4   828907.40 2123.70
   2   4   829453.25 1462.51
  -2  -4  -830363.19 1455.79
  -2   4  -828051.52 1898.77
   2   4   917121.02 1153.66
   2  -4   916027.22 1686.42
  -2   4  -915105.99 1490.59
  -2  -4  -918446.91 1193.40
   2  -4  10 8175.96 1210.38
   2   4  10 7205.78  773.48
  -2   4 -10 5288.72 1003.81
  -2  -4 -10 6368.79  913.07
   2   4  11 1392.66  595.10
   2  -4  11  955.45  884.47
  -2  -4 -11  742.78  476.94
  -2   4 -11 1017.58  763.47
   2  -4  1212173.60 1662.63
   2   4  1217703.53 1643.07
  -2  -4 -1216821.91 1111.31
  -2   4 -1217031.77 1533.09
   2   4  13 2638.10  831.03
   2  -4  13 4066.76 1157.30
  -2   4 -13 2887.80  984.04
  -2  -4 -13 2271.65  649.32
   2  -4  1431847.59 2525.68
   2   4  1423985.50 1815.40
  -2  -4 -1424194.55 1546.96
  -2   4 -1428396.86 2181.08
   2  -4  1513220.66 1935.09
   2   4  1513604.51 1479.53
  -2  -4 -1514290.96 1240.62
  -2   4 -1512160.65 1643.04
   2   4  1617265.53 1673.19
   2  -4  1618155.27 2174.90
  -2  -4 -1619150.90 1364.16
  -2   4 -1619440.54 1944.74
   2  -4  17 -186.50  985.44
   2   4  17 -377.20  710.41
  -2  -4 -17  507.91  723.29
  -2   4 -17  -70.24  841.65
   2  -4  18 -554.19 1123.02
   2   4  18  725.21  901.32
  -2  -4 -18  668.56  627.62
  -2   4 -18 1161.81  957.96
   2   4  19  265.11  972.44
   2  -4  19 1417.54 1222.35
  -2   4 -19 -140.38 1016.72
  -2  -4 -19 1784.28  704.69
   2   4  20 3530.67 1215.61
   2  -4  20 4372.39 1447.86
  -2   4 -20 3815.86 1255.84
  -2  -4 -20 2980.15  873.06
   2   4  21  533.56 1114.66
   2  -4  21  605.68 1291.21
  -2   4 -21 3068.67 1169.73
  -2  -6  21  795.36 1038.02
  -2   6  21  387.52  894.81
  -2  -6  20 2321.93 1104.45
  -2   6  20 2341.16  993.31
  -2   6  19 2007.87 1243.96
  -2  -6  19 1568.79 1040.28
   2   6 -18 4212.60 1276.86
  -2  -6  18 2352.19 1127.60
  -2   6  18 3903.71  963.64
   2   6 -17 1260.28  822.64
  -2  -6  17 2327.26 1030.31
  -2   6  17 3028.59  931.09
   2   6 -16 6147.43 1035.94
  -2   6  16 7262.98 1163.81
  -2  -6  16 4855.23 1225.25
   2   6 -1518536.42 1679.27
  -2   6  1522098.19 1851.52
  -2  -6  1518863.69 1939.58
   2  -6 -14 8537.61  684.79
   2   6 -1410041.46 1502.26
  -2  -6  14 9356.42 1288.21
  -2   6  14 9790.76 1217.32
   2  -6 -13  417.16  397.33
   2   6 -13 1748.22  674.73
  -2   6  13  625.59  766.00
  -2  -6  13  578.98  772.02
   2  -6 -12   68.84  338.75
   2   6 -12 1677.59  588.92
  -2   6  12 -273.72  634.26
  -2  -6  12   60.90  669.79
   2  -6 -11  -17.41  320.59
   2   6 -11  787.11  552.21
  -2   6  11  634.44  649.81
  -2  -6  11  336.10  629.87
   2   6 -10 1020.32  778.79
   2  -6 -10  639.22  251.48
  -2   6  10 1146.36  693.20
  -2  -6  10  369.22  636.82
   2  -6  -9 4267.14  369.00
   2   6  -9 4545.32 1002.15
  -2   6   9 3940.10  872.95
  -2  -6   9 2431.00 1089.63
   2  -6  -882325.73 3130.80
   2   6  -878922.25 3817.65
  -2   6   883729.28 4320.19
  -2  -6   886518.73 4570.84
   2  -6  -7 6089.47  554.73
   2   6  -7 7348.66  837.40
  -2  -6   7 5718.96 1087.34
   2   6  -6 3442.41  775.08
   2  -6  -6 4282.23  399.95
  -2   6   6  -89.50  981.39
  -2  -6   6 3225.54  651.15
   2  -6  -518510.29 3409.76
   2   6  -518085.99 1296.42
  -2  -6   518513.52 1458.68
  -2   6   518438.21  948.03
   2   6  -423337.41 1468.96
   2  -6  -426728.47 2024.78
  -2   6   424051.80 1449.74
  -2  -6   424781.44 1423.86
   2  -6  -315440.91 1368.00
   2   6  -312185.87  765.28
   2   6  -316530.65 1216.21
  -2   6   317728.17 1259.32
  -2  -6   315381.72  802.02
   2   6  -2   99.38  254.46
   2   6  -2  -54.39  507.45
   2  -6  -2  667.98  531.12
  -2   6   2 -251.11  627.13
  -2  -6   2  210.14  301.78
   2  -6  -127799.49 1710.35
   2   6  -127896.52 1617.77
  -2   6   125654.16 1457.77
  -2  -6   121853.77  814.52
   2   6   0126599.1 6077.00
   2  -6   0138037.1 6554.37
  -2   6   0126021.1 6139.65
   2  -6   150919.43 2811.07
  -2   6  -150075.25 2739.74
  -2  -6  -140445.67 1676.25
   2  -6   2   38.13  732.85
  -2   6  -2  384.60  620.81
  -2  -6  -2  -21.24  444.10
   2  -6   3 1682.37 1182.23
  -2   6  -3 2154.68  825.98
  -2  -6  -3 1306.22  522.30
   2   6   462705.34 2225.47
   2   6   460301.51 2026.13
   2  -6   461506.06 4410.68
  -2  -6  -459360.61 2695.15
  -2   6  -461996.19 3484.92
   2  -6   5  326.54 1002.73
   2   6   5  103.52  242.20
  -2  -6  -5  131.41  298.54
  -2   6  -5  324.30  749.96
  -2  -6  -5 -198.76  419.15
   2   6   6 8915.52  622.37
   2  -6   6 8007.10 1559.95
  -2   6  -6 9769.55 1276.25
  -2  -6  -6 8139.99  684.25
  -2  -6  -6 9297.65  807.04
   2  -6   710467.73 1549.10
   2   6   714453.85  892.46
  -2   6  -711243.14 1420.88
  -2  -6  -711601.47  934.40
   2  -6   814983.25 1534.88
   2   6   813867.81  961.63
  -2   6  -816050.78 1502.20
  -2  -6  -814155.16  964.91
   2  -6   9 7516.02 1401.57
   2   6   911819.35 1031.18
  -2   6  -9 9633.04 1357.10
  -2  -6  -910743.05  858.61
   2  -6  10  -96.07  483.83
   2   6  10  297.84  417.07
  -2   6 -10 -136.05  787.88
  -2  -6 -10  853.17  429.97
   2   6  11 6942.78  758.17
   2  -6  11 4643.36 1308.30
  -2  -6 -11 6652.83  732.13
  -2   6 -11 4058.60 1249.23
   2  -6  12  516.97  558.59
   2   6  12  774.76  737.37
  -2  -6 -12  825.74  669.74
  -2   6 -12 -437.13  899.97
   2   6  13 1470.08  700.75
   2  -6  13  915.35 1100.97
  -2  -6 -13 1234.64  579.92
  -2   6 -13 2658.54 1070.42
   2  -6  14  346.52  969.93
   2   6  14  270.57  845.10
  -2   6 -14  244.91  915.50
  -2  -6 -14   30.84  482.34
   2  -6  15 2078.81 1323.95
   2   6  15 2428.24  916.53
  -2  -6 -15 3745.16  722.54
  -2   6 -15 3287.05 1294.86
   2  -6  1612852.01 1883.56
   2   6  1611007.23 1278.47
  -2  -6 -1611631.40 1040.47
  -2   6 -1611882.27 1734.29
   2  -6  17 -238.61  980.61
   2   6  17  598.70  690.91
  -2   6 -17 -362.82  940.94
  -2  -6 -17 -273.00  546.35
   2  -6  1821417.48 2411.78
   2   6  1822213.01 1823.79
  -2  -6 -1821239.06 1909.22
  -2   6 -1819140.73 2303.59
   2   6  19  940.72 1255.16
   2  -6  19  663.19 1207.70
  -2   6 -19 3227.17 1103.91
  -2  -6 -19 -101.51  655.77
   2   6  20  239.93  866.47
   2  -6  20  361.67 1118.05
  -2   6 -20  270.04 1037.73
  -2   8  20  -36.73  730.59
  -2  -8  20  -90.27  930.16
  -2  -8  19 4860.18 1278.86
  -2   8  19 3145.22  986.74
   2   8 -18 3056.91 1036.61
  -2  -8  18 7273.11 1300.94
  -2   8  18 6251.70 1074.92
   2   8 -17 4996.10 1112.45
  -2  -8  17 4241.57 1348.40
  -2   8  17 7602.18 1471.13
   2   8 -16 1567.76  836.15
  -2  -8  16 1596.32  977.91
  -2   8  16 1458.03  891.79
   2   8 -1520981.82 1826.54
  -2  -8  1524793.62 2270.73
  -2   8  1525567.20 2013.46
   2   8 -14 2769.70 1283.05
  -2  -8  14 4466.04 1087.20
  -2   8  14 4169.05  926.87
   2   8 -13 3826.41  810.53
   2  -8 -13 1002.91  373.35
  -2  -8  13  190.10  924.38
  -2   8  13 1922.98  845.97
   2   8 -12 1130.47  733.05
   2  -8 -12  615.17  319.04
  -2  -8  12 1360.21  766.74
  -2   8  12  878.65  718.47
   2  -8 -11 6446.27  538.72
   2   8 -11 8579.24 1030.13
  -2   8  11 5320.96 1079.19
  -2  -8  11 7952.18 1075.81
   2  -8 -1018981.04 1100.45
   2   8 -1021029.76 1520.78
  -2  -8  1019292.59 1493.06
  -2   8  1019515.93 1558.42
   2   8  -9 -208.49  615.91
   2  -8  -9  302.45  288.27
  -2  -8   9  269.19  591.92
  -2   8   9  416.92  684.82
   2   8  -812528.23 1186.18
   2  -8  -811605.92  835.72
  -2  -8   813139.06 1090.99
  -2   8   811497.86 1188.41
   2  -8  -7 6400.34  536.11
   2   8  -7 7341.08  905.07
  -2  -8   7 6947.54  836.74
  -2   8   7 4904.98 1061.84
   2   8  -6  939.48  625.39
   2  -8  -6  789.63  382.62
  -2  -8   6  734.78  500.88
  -2   8   6  283.40  723.17
   2   8  -518454.36 1341.49
   2  -8  -517803.14 2077.93
  -2  -8   516231.08 1401.39
  -2   8   517365.34 1036.38
   2   8  -4 7142.12  901.55
   2  -8  -4 5763.63  967.41
  -2  -8   4 4547.28  830.96
   2   8  -3 5569.12  808.50
   2  -8  -3 2913.49  786.51
  -2  -8   3 1875.36  676.39
  -2   8   3 5641.25  701.67
   2   8  -217799.10 1296.41
   2   8  -215081.59  697.18
   2  -8  -217033.89 1200.58
  -2  -8   218760.73 1157.60
  -2   8   217336.17 1171.88
   2  -8  -169608.21 3814.78
   2   8  -166048.86 3409.67
  -2   8   164445.08 3466.99
   2  -8   025467.67 1495.56
   2   8   024694.64 1567.84
   2   8   022694.41  681.80
  -2   8   024985.44 1642.86
  -2  -8   024146.01  709.09
   2  -8   1163555.9 9022.30
  -2   8  -1168592.5 9382.62
   2  -8   270271.10 3654.54
  -2   8  -271320.36 3730.04
  -2  -8  -266236.42 3211.22
   2  -8   378116.87 5025.72
  -2   8  -375639.73 4660.39
  -2  -8  -377980.63 3998.79
   2  -8   446660.45 3170.29
   2   8   439633.28 1164.65
   2   8   439999.95 1154.09
  -2   8  -443935.67 2613.30
  -2  -8  -441971.29 2011.07
   2  -8   535071.53 3156.95
   2   8   528651.66 1013.04
  -2   8  -533785.68 2322.27
  -2  -8  -533654.26 1871.48
   2  -8   6  936.14  978.19
   2   8   6  177.08  183.85
   2   8   6  291.91  203.95
  -2   8  -6  142.64  722.15
  -2  -8  -6 -265.22  439.69
   2   8   7   -5.72  261.10
   2  -8   7 -245.53  828.89
  -2   8  -7 -109.65  680.59
  -2  -8  -7   33.76  408.51
   2  -8   8 2700.86 1188.89
   2   8   8 2699.70  469.38
  -2   8  -8 1890.32  978.58
  -2  -8  -8 3060.10  573.57
   2   8   911345.15  871.62
   2  -8   9 5456.02 1595.71
  -2  -8  -911325.62  945.68
  -2   8  -910038.77 1489.66
   2   8  10  105.18  328.43
   2  -8  10  247.07  896.54
  -2  -8 -10 -471.71  431.25
  -2   8 -10  439.53  792.94
   2  -8  1122238.41 2533.23
   2   8  1125744.60 1791.20
  -2   8 -1123509.79 2458.16
  -2  -8 -1121223.10 1402.48
   2  -8  12 -954.20 1067.84
   2   8  12  783.26  501.65
  -2  -8 -12  443.70  515.97
  -2   8 -12 1977.03 1001.28
   2  -8  1315143.77 2497.94
   2   8  1323792.37 1564.28
  -2   8 -1318837.23 2250.61
  -2  -8 -1320006.98 1447.48
   2  -8  1417024.50 1455.93
   2   8  1417814.10 1343.60
  -2   8 -1416864.52 2108.87
  -2  -8 -1416550.37 1241.46
   2  -8  15 2413.89 1326.88
   2   8  15 2336.01  751.29
  -2   8 -15 3115.82 1291.27
  -2  -8 -15 1795.05  668.43
   2  -8  16 6057.57 1585.89
   2   8  16 3729.92 1267.04
  -2   8 -16 5981.51 1514.03
  -2  -8 -16 6536.54  840.32
   2  -8  17 5702.54 1673.42
  -2   8 -17 4876.58 1643.87
  -2  -8 -17 7545.41  940.17
   2  -8  18 -658.63 1118.27
  -2   8 -18 -238.10 1018.33
  -2  -8 -18 1227.18  795.66
   2  -8  19 3225.18 1516.40
  -2   8 -19 5494.93 1972.52
  -2 -10  19   65.34  987.85
  -2  10  19  101.02  709.81
   2  10 -18   36.12  777.86
  -2 -10  18 -104.76  957.99
  -2  10  18  424.65  977.76
   2  10 -17 1576.69  940.03
  -2 -10  17 2912.51 1119.11
  -2  10  17 1239.38  824.90
   2  10 -16 -110.55  812.61
  -2 -10  16  448.47  942.67
  -2  10  16 1352.62  785.88
   2  10 -15  887.61  922.38
  -2 -10  15 2963.09 1044.37
  -2  10  15 1960.19  845.60
   2  10 -1431552.18 2295.32
  -2  10  1429482.10 2102.15
  -2 -10  1427480.82 2357.54
   2  10 -13-1161.93  811.10
  -2  10  13 -181.26  710.36
  -2 -10  13 -151.34  842.24
   2  10 -1214339.39 1595.43
   2 -10 -1216379.34  949.67
  -2  10  1214448.80 1832.84
  -2 -10  1214272.61 1606.83
   2  10 -11  617.39  837.82
   2 -10 -11  970.36  582.39
  -2  10  11  192.72 1033.08
  -2 -10  11  952.35  869.18
   2  10 -10 1233.77  890.59
   2 -10 -10 1637.36  618.96
  -2 -10  10 3794.81 1269.29
  -2  10  10 1186.58 1067.91
   2  10  -911518.05 1223.43
   2 -10  -9 8389.44  977.34
  -2 -10   9 7711.09 1239.95
  -2  10   9 9489.24 1251.62
   2 -10  -811468.53  855.49
   2  10  -811170.76 1270.34
  -2  10   811840.84 1320.01
  -2 -10   813926.93 1285.45
   2  10  -713457.58 1269.82
   2 -10  -710729.92  849.53
  -2 -10   7 9299.47 1187.18
  -2  10   711570.46 1368.09
   2  10  -6 4978.48  927.04
   2 -10  -6 4708.67  425.55
  -2  10   6 5752.68  617.39
  -2 -10   6 8080.44 1086.61
   2  10  -5 1285.09  440.19
   2 -10  -5 2705.40 1077.37
  -2 -10   5  883.81  756.76
  -2  10   5  699.24  534.73
   2  10  -4 1593.46  698.74
   2 -10  -4  750.21  690.18
  -2  10   4  589.76  520.86
  -2 -10   4  820.01  513.05
   2  10  -3 1460.65  655.45
   2 -10  -3  523.69  901.81
  -2 -10   3  492.91  684.97
  -2  10   3  294.89  538.09
   2  10  -2 7336.67  916.69
   2 -10  -2 7484.28  880.86
  -2 -10   2 7426.58  712.30
  -2  10   2 7852.46  951.99
   2 -10  -1 5954.01  835.23
   2  10  -1 4684.85  917.41
  -2  10   1 8488.45  945.51
   2  10   0   15.53   94.30
   2  10   0  116.83  547.71
  -2 -10   0  -38.80  135.69
  -2  10   0 1059.78  550.09
   2 -10   1  308.11  460.03
  -2 -10  -1  -91.99  289.40
  -2  10  -1 -128.01  588.47
   2 -10   2 5645.25  805.63
  -2  10  -2 6573.80  950.12
  -2 -10  -2 6766.20  885.16
   2 -10   3 4272.03  996.34
  -2 -10  -3 8863.97  883.02
  -2  10  -3 5027.77 1011.30
   2 -10   4  845.25  856.70
  -2 -10  -4 1098.06  592.07
  -2  10  -4 1307.12  775.13
   2 -10   5 1398.08 1058.11
  -2  10  -5 1669.66  900.57
  -2 -10  -5 1878.12  618.98
   2  10   628149.38  954.59
  -2  10  -632280.18 2252.80
  -2 -10  -630679.92 1700.49
   2  10   7 2989.86  310.40
   2 -10   7 4743.43 2084.18
  -2 -10  -7 2599.21  700.18
  -2  10  -7 2604.13 1056.24
   2  10   818724.93  889.53
   2 -10   819953.11 2562.10
  -2 -10  -819381.07 1324.05
  -2  10  -820438.50 1945.91
   2 -10   983957.79 7113.57
  -2 -10  -989130.20 5093.49
  -2  10  -981214.86 6113.00
   2 -10  1084339.98 5985.98
  -2 -10 -1085852.75 4383.91
  -2  10 -1090749.37 5798.50
   2 -10  1118494.79 2554.98
  -2 -10 -1115369.08 1317.50
  -2  10 -1116118.98 2087.85
   2 -10  12 5896.58 1921.13
  -2  10 -12 9085.88 1567.74
  -2 -10 -12 9473.10  933.62
   2 -10  13  873.94 1202.48
  -2 -10 -13  438.68  557.79
  -2  10 -13  562.91 1057.00
   2 -10  14 2649.66 1676.11
  -2 -10 -14 4818.14  821.91
  -2  10 -14 8939.76 1481.66
   2 -10  15  725.64 1282.97
  -2 -10 -15 1132.67  601.54
  -2  10 -15  516.24 1076.63
   2 -10  16 6683.96 1993.68
  -2 -10 -1611130.98 1337.09
  -2  10 -1610975.08 1716.11
   2 -10  17 2432.62 1205.92
  -2 -10 -17  261.38  566.83
  -2  10 -17   32.42 1090.18
   2 -10  18 1782.43 1405.67
  -2  10 -18 2851.12 1282.60
   2  12 -17 2055.58 1042.50
  -2 -12  17  216.19 1088.34
   2  12 -16 8112.16 1426.38
  -2 -12  16 6825.42 1547.12
   2  12 -15 1096.01  908.66
  -2 -12  15  190.50 1035.39
   2  12 -1418448.25 1889.55
  -2 -12  1417682.86 1957.99
   2  12 -13  608.47  793.28
  -2  12  13   14.33  644.31
  -2 -12  13 -330.26 1205.09
   2  12 -12 1021.83  875.31
   2 -12 -12  608.22  468.44
  -2  12  12 1123.38  988.53
  -2 -12  12  875.34  930.33
   2  12 -11 -391.75  746.87
   2 -12 -11  256.46  595.63
  -2 -12  11  251.36  768.84
  -2  12  11   33.33  867.41
   2  12 -10  101.28  817.83
   2 -12 -10  773.62  494.86
  -2 -12  10   63.20  842.04
  -2  12  10 1265.53  966.61
   2  12  -931390.28 2437.48
   2 -12  -932295.97 2166.04
  -2 -12   925912.03 2419.84
  -2  12   926690.33 2319.83
   2  12  -8 7951.18 1218.23
   2 -12  -8 6118.76  816.28
  -2 -12   8 7402.98 1210.82
  -2  12   8 5195.80 1118.06
   2  12  -7329023.621741.72
   2 -12  -7305730.218904.47
  -2 -12   7287067.120748.07
  -2  12   7279343.421134.47
   2  12  -6 7812.83 1213.35
   2 -12  -6 4978.86  537.86
  -2 -12   6 5417.80 1002.35
  -2  12   6 6520.02 1140.14
   2  12  -518585.96 1660.05
   2 -12  -510708.80 2653.76
  -2  12   517583.39 1431.65
   2  12  -4117890.2 6578.55
   2 -12  -4125571.5 8261.54
  -2 -12   4110429.8 6228.30
  -2  12   4116693.9 6165.24
   2 -12  -3 6194.94 1305.36
   2  12  -3 3978.02  928.64
  -2  12   3 2491.45  860.34
   2 -12  -2  420.99  652.11
   2  12  -2  612.52  631.61
  -2  12   2  349.56  666.28
   2 -12  -1 1101.76  688.92
   2  12  -1 2009.00  796.17
  -2  12   1 2428.37  831.46
   2 -12   022242.26 1564.49
   2  12   019856.98 1165.91
  -2  12   022070.89 1658.82
   2 -12   1-1322.03  542.19
  -2  12  -1 -207.55  706.93
  -2 -12  -1   77.00  396.39
   2 -12   2  488.80  837.79
  -2  12  -2 -101.35  756.17
  -2 -12  -2  374.57  386.56
   2 -12   3  468.58  644.41
  -2 -12  -3    7.70  646.51
  -2  12  -3  737.66  468.97
   2 -12   4 1597.85  825.45
  -2 -12  -4 2295.14  719.64
  -2  12  -4  632.17  872.41
   2 -12   5 -912.10  855.94
  -2  12  -5  177.57  817.45
  -2 -12  -5 -294.45  601.16
   2 -12   6 5309.61 1543.47
  -2  12  -6 6111.74  767.50
  -2 -12  -6 7046.32  939.52
   2 -12   7 -208.25 1608.78
  -2 -12  -7 -468.85  608.04
  -2  12  -7  -49.28  823.25
   2 -12   8 5248.38 1932.39
  -2  12  -8 5860.49 1318.03
  -2 -12  -8 7005.62  938.34
   2 -12   911618.87 2650.11
  -2 -12  -919435.00 1532.34
  -2  12  -915913.38 1932.96
   2 -12  10  452.49 1631.47
  -2 -12 -10 3307.44  763.62
  -2  12 -10 1508.13 1179.23
   2 -12  11 -777.12 1498.32
  -2 -12 -11  836.36  647.69
  -2  12 -11 3010.17 1103.07
   2 -12  12 2148.97 1797.50
  -2 -12 -12 5282.49  847.25
  -2  12 -12 5641.96 1391.05
   2 -12  13 3509.73 1678.29
  -2 -12 -13 4560.49  848.98
  -2  12 -13 4014.06 1390.18
   2 -12  14 1040.47 1330.34
  -2 -12 -14  677.30  597.74
  -2  12 -14 1349.94 1080.72
   2 -12  15  452.47 1250.64
  -2 -12 -15  129.47  595.98
  -2  12 -15 2820.52 1115.38
   2 -12  16 6561.95 1870.59
  -2 -12 -16 6463.20  939.77
  -2  12 -16 8722.21 1637.61
   2  14 -15 5310.03 1402.77
   2  14 -14 6162.13 1357.20
   2  14 -13  471.12  933.00
   2  14 -12 -847.69  909.65
   2  14 -11  966.41  543.74
   2 -14 -11 1085.99  794.96
   2  14 -10 -170.70  789.56
   2 -14 -10  386.98  533.80
   2  14  -9 4757.98 1190.46
   2 -14  -9 3646.81  789.30
   2  14  -815760.97 1754.42
   2 -14  -7 4510.78  874.28
   2  14  -7 2513.01 1177.33
   2 -14  -624599.03 1811.13
   2  14  -618996.74 1887.98
   2  14  -5 2942.93  942.99
  -2  14   5 1191.90  791.75
   2  14  -440222.13 2706.62
  -2  14   445651.91 2809.98
   2  14  -314613.26 1532.27
  -2  14   312697.33 1369.25
   2  14  -2  263.04  783.16
   2 -14  -2  951.33  780.05
  -2  14   2  647.22  747.99
   2 -14  -1 1683.95  778.24
   2  14  -1 1467.45  898.03
  -2  14   1 2183.53  866.33
   2  14   0 3035.40  975.13
   2 -14   0 2325.97 1173.15
  -2  14   0 3728.61  997.69
   2 -14   115534.46 1535.89
  -2 -14  -120872.40 1892.53
  -2  14  -120178.37 1321.98
   2 -14   2 3039.74 1055.27
  -2 -14  -2 2244.99  991.12
  -2  14  -2 2405.75  952.56
   2 -14   3 1137.93  719.56
  -2 -14  -3  860.72  820.04
  -2  14  -3  852.13  851.70
   2 -14   4  406.07  681.97
  -2 -14  -4 1773.18  788.83
  -2  14  -4 -263.08  849.58
   2 -14   5  418.75  687.26
  -2 -14  -5  324.77  702.71
  -2  14  -5   -4.13  878.00
   2 -14   6  905.52  890.25
  -2 -14  -6  496.39  753.31
  -2  14  -6  801.66  976.27
   2 -14   7 2295.19 1106.86
  -2 -14  -7 2421.02  862.76
  -2  14  -7 2571.94 1054.15
   2 -14   8 5340.90 1409.55
  -2 -14  -8 3278.43  950.25
  -2  14  -8 4021.13 1197.58
   2 -14   9 2336.84 1362.15
  -2 -14  -9 2661.73  862.39
  -2  14  -9 3007.26 1088.69
   2 -14  10 7755.71 1872.84
  -2  14 -10 9078.85 1505.85
  -2 -14 -10 9728.00 1154.47
   2 -14  11 1592.74 1467.88
  -2 -14 -11 1095.94  776.82
  -2  14 -11 1726.30 1058.09
   2 -14  12 2016.79 1561.16
  -2 -14 -12 2470.10 1040.05
  -2  14 -12 1442.60 1110.29
   2 -14  13 3935.90 1704.32
  -2  14 -13 2301.70 1209.89
  -2 -14 -13 2298.65  790.69
   2 -14  14 3070.68 1883.08
  -2  14 -14 2794.19 1346.44
  -2 -14 -14 5152.21  894.63
   2  16 -12 -322.49  977.24
   2  16 -11 1255.80 1043.38
   2 -16 -10 3201.71  844.63
   2  16 -10 4153.48 1217.43
   2  16  -9 2381.02  585.94
   2 -16  -9 -776.03  700.56
   2  16  -8 2769.50 1099.77
   2 -16  -8 3335.18  908.09
   2  16  -7 2928.10 1046.44
   2 -16  -7 2505.29  928.58
   2 -16  -6  538.62  814.89
   2  16  -6-1485.30  773.09
   2  16  -5 -174.53  724.04
   2 -16  -5 -143.42  452.82
   2  16  -4 3784.94 1118.66
  -2  16   4 4790.69 1126.05
   2  16  -3  -41.97  778.88
  -2  16   3  459.19  787.11
   2  16  -2 6982.34 1238.40
  -2  16   2 6619.17 1141.58
   2  16  -1  987.20  910.40
  -2  16   1 1144.01  813.93
  -2 -16   0 7743.91  844.82
  -2  16   0 2674.49 1166.41
  -2 -16  -1 2987.60 1103.95
  -2  16  -1 1659.30 1024.56
  -2 -16  -2   38.24  843.08
  -2  16  -2  335.69  842.57
  -2 -16  -3  576.58  985.78
  -2  16  -3 2051.27  981.14
  -2 -16  -4 1297.95  913.11
  -2  16  -4  299.17  924.66
  -2 -16  -5  786.35  794.11
  -2  16  -5 -492.83  801.50
  -2 -16  -6 8729.73 1264.23
  -2  16  -6 4340.36 1319.58
  -2 -16  -7 -200.92  776.70
  -2  16  -7 -435.40  856.03
  -2 -16  -8  934.18  851.77
  -2  16  -8 1226.24 1031.96
  -2 -16  -9 2326.39  937.32
  -2  16  -9 2137.65 1179.01
  -2 -16 -1011727.46 1376.06
  -2  16 -10 9212.24 1708.83
   2 -16  11 1501.84 1131.82
  -2 -16 -11  543.77  707.96
  -2  16 -11 -400.65  563.76
   2  18  -7  745.24  779.41
   2 -18  -7 -836.49  763.21
   2  18  -6 2658.12 1097.27
   2 -18  -6 2227.32 1025.27
   2  18  -5 -836.78  886.27
   2 -18  -5   -7.99 1365.42
   2  18  -4  340.55  905.60
   2 -18  -4-1091.90  578.28
   2  18  -3  398.11  510.70
  -2  18   3   98.02  859.33
   2  18  -2 2472.95  975.91
  -2  18   2  466.54  968.44
  -2 -18   1 6084.51  826.61
  -2  18   1 1928.68 1163.14
  -2 -18   0 2685.07 1131.38
  -2  18   0 1159.03  942.27
  -2 -18  -1 1654.30 1048.13
  -2  18  -1  709.59  955.51
  -2 -18  -2 1713.05  646.57
  -2  18  -2  295.83  953.86
  -2 -18  -3-1037.17  923.61
  -2  18  -3  639.81  887.44
  -2 -18  -4  846.95  919.97
  -2  18  -4 -159.39  951.03
  -2 -18  -5 4217.52 1028.74
  -2  18  -5   42.13 1229.95
  -2 -18  -6 2175.94  938.32
  -2  18  -6  965.81 1084.09
  -3  -1  22 4639.74 1415.38
  -3   1  22 6898.46 1404.61
  -3   1  21 -186.58  987.50
  -3  -1  21 3186.95 1039.44
  -3   1  20 7694.22 1358.69
  -3  -1  20 7432.12 1370.18
  -3   1  19 4374.49 1122.51
  -3  -1  19 3971.66 1108.71
  -3   1  18 2960.58 1151.75
  -3  -1  18 5080.16 1145.31
  -3  -1  17  704.69  838.30
  -3   1  17 1159.36  840.86
  -3   1  1660518.27 4052.04
  -3  -1  1656041.83 3840.34
   3   1 -15330592.719164.06
  -3  -1  15313953.319724.46
  -3   1  15327915.120959.69
   3   1 -1416173.19 1178.85
   3  -1 -1416528.00  998.54
  -3   1  1417332.86 1695.98
  -3  -1  1418512.80 1628.88
   3  -1 -13 8712.67  589.06
   3   1 -13 9180.99  730.17
  -3   1  13 8937.44 1166.38
  -3  -1  13 9101.19 1114.89
   3  -1 -12  380.91  228.94
   3   1 -12  -58.93  379.91
  -3   1  12  601.48  672.80
  -3  -1  12  478.38  666.35
   3  -1 -1114996.64  637.33
   3   1 -1115577.22  852.56
  -3  -1  1112976.76 1284.83
  -3   1  1115347.28 1375.89
   3  -1 -10 1416.94  188.03
   3   1 -10  936.65  369.34
  -3  -1  10 1217.60  703.79
  -3   1  10 1223.48  121.21
  -3   1  10 1082.83  756.14
  -3  -1  10  891.02  237.65
   3   1  -968758.42 2595.95
   3  -1  -964171.18 2059.04
  -3   1   966838.55 3603.27
  -3   1   960567.40 1855.90
  -3  -1   961127.51 2149.34
  -3  -1   964041.86 3353.41
   3   1  -816491.31  745.81
  -3  -1   817302.62 1443.45
  -3  -1   813606.89  578.73
  -3   1   818080.77 1581.11
   3   1  -7 1200.27  274.10
  -3  -1   7 1342.07  762.47
  -3   1   7 1374.01  835.80
  -3  -1   7  779.04  176.82
   3   1  -6 4746.93  298.55
  -3   1   6 3206.14  990.86
  -3  -1   6 3766.61  915.02
  -3  -1   6 4684.68  332.62
  -3   1   5 1684.80 1039.91
  -3  -1   5 2290.77  256.13
  -3  -1   5 3289.89  843.18
   3  -1  -4  454.12  733.07
  -3  -1   4  419.66  225.99
  -3   1   4  169.62   86.83
  -3   1   4  -29.83  487.61
  -3  -1   4  201.11  697.35
  -3  -1   4  430.47  257.81
   3  -1  -313499.07  393.95
   3  -1  -313489.74 1725.79
  -3   1   313754.17  462.95
  -3  -1   312632.72  630.87
  -3  -1   313910.63 1967.34
  -3  -1   313490.75  531.48
   3  -1  -2  413.55  221.55
   3   1  -2  245.24  296.90
   3   1  -2 -371.63 1405.12
   3  -1  -2  326.34  829.06
  -3   1   2  306.97  295.75
  -3  -1   2  273.15  345.90
  -3  -1   2  176.92  458.46
   3  -1   0 3557.99  383.22
   3   1   0 4076.14  431.04
   3  -1   0 3751.64  877.39
   3   1   0 4194.06  678.67
  -3   1   0 4720.43  747.18
  -3  -1   0 4759.96  572.98
  -3  -1   0 3431.75  498.83
   3  -1   2 2496.49  999.37
   3   1   2 2450.71  708.04
  -3   1  -2 3203.84  675.86
  -3  -1  -2 3119.62  854.15
  -3  -1  -2 1977.90  630.49
   3  -1   415559.90 1739.64
   3   1   416565.20 1416.49
  -3   1  -416939.12 1261.13
  -3  -1  -416152.74 1147.46
   3  -1   5 2498.82  965.47
   3   1   5 1760.61  709.92
  -3  -1  -5 2120.67  539.94
  -3   1  -5 2063.40  613.25
   3  -1   618421.32 1779.55
   3   1   622508.28 1634.30
  -3  -1  -621604.88 1414.26
  -3   1  -621593.73 1440.43
   3  -1   755756.12 3259.49
   3   1   755852.16 2937.40
  -3   1  -753009.22 2592.35
  -3  -1  -753421.30 2497.30
   3  -1   8  767.80  835.91
   3   1   8  604.26  704.64
  -3   1  -8 1404.17  621.02
  -3  -1  -8  230.77  529.60
   3  -1   938604.91 2427.04
   3   1   940767.56 2294.00
  -3  -1  -938212.56 1998.40
  -3   1  -939673.57 2101.80
   3   1  1010223.05 1184.79
   3  -1  1010047.36 1260.79
  -3   1 -10 9362.79  988.69
  -3  -1 -10 8672.58  930.08
   3  -1  11 8498.08 1213.93
   3   1  11 8630.18 1134.46
  -3   1 -11 7087.59  916.59
  -3  -1 -11 7030.80  834.69
   3   1  12 3033.21  933.50
   3  -1  12 2285.13 1048.40
  -3   1 -12 3372.67  777.10
  -3  -1 -12 2787.48  767.97
   3   1  1384272.84 4816.18
   3  -1  1383735.89 4963.92
  -3  -1 -1381562.47 4203.65
  -3   1 -1384529.80 4534.95
   3   1  14  165.02  846.22
   3  -1  14  711.73  937.59
  -3  -1 -14  200.12  887.29
  -3   1 -14   55.37  688.66
   3  -1  1579703.52 5184.94
   3   1  1583077.37 5057.57
  -3  -1 -1580212.50 4425.97
  -3   1 -1578818.74 4553.77
   3  -1  16 3807.02 1427.33
   3   1  16 4628.59 1384.87
  -3   1 -16 3965.47 1099.51
  -3  -1 -16 5610.48 1026.48
   3  -1  1733218.01 2881.71
   3   1  1736657.22 2884.03
  -3  -1 -1731772.89 2221.57
  -3   1 -1731034.53 2320.94
   3   1  18 2175.06 1137.44
   3  -1  18 2241.12 1192.37
  -3   1 -18  651.83  885.88
  -3  -1 -18  393.17  842.27
   3  -1  19 8272.84 1825.33
   3   1  19 9967.42 1729.93
  -3   1 -1910031.73 1410.03
  -3  -1 -19 9314.92 1331.54
   3  -1  20  911.34 1168.28
   3   1  20   -3.33 1168.47
  -3   1 -20  511.33  906.17
  -3  -1 -20  646.79  812.45
   3  -1  21 8704.23 1822.06
   3   1  21 6859.81 1778.81
  -3   1 -21 8702.86 1458.01
  -3  -1 -21 6572.29 1253.49
  -3   3  22 2678.38 1167.82
  -3  -3  21  398.08 1045.97
  -3   3  21 3858.82 1055.98
  -3   3  20 1011.55  880.66
  -3  -3  20  472.14  903.98
  -3   3  19  905.91  872.83
  -3  -3  19 1402.27  906.15
  -3  -3  18   27.32  816.19
  -3   3  18  336.50  765.09
  -3  -3  1720178.45 1838.22
  -3   3  1719693.68 1819.79
  -3   3  16 2294.43 1214.36
  -3  -3  16 5148.72 1092.06
   3   3 -15 5904.36  692.88
  -3  -3  15 7455.83 1095.71
  -3   3  15 6857.45 1233.54
   3   3 -1419068.27 1550.15
  -3   3  1420128.11 1816.67
  -3  -3  1420955.95 1774.66
   3  -3 -13 3052.26  268.35
   3   3 -13 3012.20  524.27
  -3  -3  13 3617.62  840.38
  -3   3  13 4005.19  949.70
   3   3 -12 1109.84  550.05
   3  -3 -12  326.04  198.87
  -3   3  12 1210.79  764.14
  -3  -3  12 1516.19  636.67
   3  -3 -11 2594.07  186.85
   3   3 -11 3494.16  608.58
   3  -3 -11 3112.29  239.80
  -3  -3  11 3716.95  778.36
  -3   3  11 2768.69  871.62
   3   3 -1030398.12 1655.05
  -3   3  1028895.84 2151.05
  -3  -3  1027691.55 1884.95
   3  -3  -914305.59  412.46
   3  -3  -917493.88  489.44
   3   3  -916643.73 1045.19
  -3   3   916474.15 1490.90
  -3  -3   916547.92 1300.54
   3  -3  -821276.12  655.31
   3   3  -826279.53 1438.79
  -3   3   822359.17 1931.19
  -3  -3   823401.10 1628.03
   3   3  -7155494.3 7079.71
   3  -3  -7144245.3 5521.21
  -3   3   7146635.8 8302.44
  -3  -3   7151402.9 7479.96
   3   3  -612291.73  914.61
  -3   3   6 7888.78 1545.83
  -3  -3   6 9288.89 1023.97
   3  -3  -552177.57 1637.81
   3   3  -554504.47 2357.16
   3  -3  -545986.37 4229.07
  -3  -3   549589.33 2322.64
   3  -3  -4 6828.89  367.03
   3   3  -4 7570.23  579.16
   3  -3  -4 5316.57 1422.40
  -3   3   4 7089.59  421.82
  -3  -3   4 7980.75  744.51
   3  -3  -389532.03 3303.20
   3  -3  -394796.77 5023.54
  -3  -3   393433.44 4315.63
  -3  -3   392629.81 4618.29
  -3   3   393706.50 3629.28
   3  -3  -211311.18 1295.20
   3  -3  -210580.14  537.03
  -3  -3   2 9979.48  731.56
  -3  -3   211022.93  722.37
  -3  -3   211280.19  976.29
  -3   3   212500.21  941.52
   3  -3  -122276.65 1078.42
   3  -3  -121285.70 1065.28
  -3   3   121294.60 1376.62
  -3  -3   121114.23 1385.81
  -3  -3   120949.17  878.77
  -3  -3   118168.96  990.24
   3  -3   014862.16 1355.37
   3   3   012820.58  958.20
  -3  -3   012157.16  662.78
  -3  -3   016023.76  974.71
  -3   3   014505.94 1070.90
   3  -3   1 9423.10  945.21
   3   3   1 5769.88  444.20
  -3   3  -1 6740.03  816.10
  -3  -3  -1 6387.07  680.25
  -3  -3  -1 6068.62  608.12
   3  -3   2 4729.10 1214.39
   3   3   2 6988.70  586.33
  -3   3  -2 7411.12  889.29
  -3  -3  -2 5777.81  555.63
  -3  -3  -2 7871.91  773.47
   3  -3   3464778.330979.48
  -3  -3  -3449269.626510.74
  -3   3  -3445519.128072.41
   3  -3   4 3212.30 1322.73
   3   3   4 3329.84  808.79
  -3   3  -4 2656.90  720.01
  -3  -3  -4 2766.46  314.76
  -3  -3  -4 2367.18  587.34
   3  -3   5 5480.63 1435.26
   3   3   5 5982.42  688.53
  -3   3  -5 5904.99  889.77
  -3  -3  -5 6862.29  691.80
   3  -3   6 5158.72 1443.28
   3   3   6 3499.60  987.71
  -3   3  -6 4126.42  905.14
  -3  -3  -6 6103.11  730.74
   3  -3   7197085.011471.52
   3   3   7202168.510704.21
  -3   3  -7193961.210385.61
  -3  -3  -7195046.2 9874.13
   3  -3   8  657.16  811.17
   3   3   8 -183.47  484.63
  -3   3  -8  -25.69  569.78
  -3  -3  -8  196.65  447.49
   3  -3   959958.94 3544.90
   3   3   964917.64 3462.70
  -3  -3  -961934.53 2870.16
  -3   3  -957695.78 3064.10
   3  -3  10 2777.24  988.02
   3   3  10 1511.70  732.75
  -3  -3 -10 3100.54  669.32
  -3   3 -10 3522.03  793.56
   3  -3  11 9653.98 1384.07
   3   3  11 9415.36 1036.99
  -3  -3 -11 9452.12  893.16
  -3   3 -1110242.30 1137.72
   3  -3  12 1879.43 1026.76
   3   3  12 2709.88  773.89
  -3  -3 -12 1335.18  626.55
  -3   3 -12 1556.45  839.24
   3  -3  13 -139.49  878.37
   3   3  13  401.19  665.42
  -3  -3 -13  195.21  518.22
  -3   3 -13 -322.42  662.37
   3  -3  14 2123.76 1100.75
   3   3  14  985.10  846.76
  -3  -3 -14  354.13  648.01
  -3   3 -14  276.00  825.73
   3   3  1514446.97 1595.82
   3  -3  1517456.12 2005.60
  -3  -3 -1511807.76 1227.69
  -3   3 -1515646.85 1650.56
   3   3  16   80.93  899.10
   3  -3  16 1468.79 1142.72
  -3   3 -16 1129.06  925.84
  -3  -3 -16 1140.66  706.46
   3  -3  17 3258.82 1341.33
   3   3  17 2218.13 1067.05
  -3   3 -17 3023.90 1052.03
  -3  -3 -17 2483.32  844.83
   3  -3  18 -306.28 1134.62
   3   3  18  541.68  976.34
  -3   3 -18  513.15  955.01
  -3  -3 -18 1636.22  745.61
   3  -3  19  -16.93 1165.46
   3   3  19 1240.67 1047.39
  -3   3 -19  898.29  958.21
  -3  -3 -19  724.41  730.37
   3  -3  20  447.33 1231.93
   3   3  20 2275.62 1533.08
  -3   3 -20 1847.30 1418.89
  -3  -3 -20  804.24  794.58
   3   3  21 1601.91 1242.46
   3  -3  21 2864.81 1377.50
  -3   3 -21 1923.85 1151.30
  -3  -3 -21 1392.50  920.01
  -3   5  21  965.36  909.34
  -3  -5  21  -25.30  941.01
  -3   5  20  767.08  831.51
  -3  -5  20  186.00  926.10
  -3   5  19 1321.34  882.70
  -3  -5  19  954.32  949.36
  -3   5  18 1743.68  871.19
  -3  -5  18  171.66  927.74
  -3  -5  1717716.65 1752.09
  -3   5  1715945.76 1697.81
   3   5 -16 1541.95  661.60
  -3  -5  16 2796.96  983.17
   3   5 -15 9068.12  951.28
  -3   5  1510886.08 1324.51
  -3  -5  15 9358.10 1296.99
   3   5 -14  -30.11  713.55
  -3   5  14  706.17  820.27
  -3  -5  14  723.02  742.00
   3   5 -13  394.01  444.05
  -3   5  13 -829.11  697.95
  -3  -5  13   66.28  654.89
   3   5 -12 2079.56  761.97
  -3   5  12 1319.01  899.67
  -3  -5  12 1814.57  751.95
   3  -5 -11 6806.24  347.00
   3   5 -11 6093.87  710.08
  -3   5  11 7392.50 1122.37
  -3  -5  11 8075.88  939.24
   3  -5 -10   -6.88  187.80
   3   5 -10  132.08  412.08
  -3   5  10  249.67  677.58
  -3  -5  10  241.71  553.23
   3  -5  -9  720.10  184.94
   3  -5  -9  590.78  170.29
   3   5  -9  333.81  653.83
  -3   5   9  388.29  746.25
  -3  -5   9 -180.20  542.82
   3  -5  -8 3152.49  288.28
   3   5  -8 3144.43  556.67
   3  -5  -8 1834.17  288.86
  -3   5   8 1374.80  989.11
  -3  -5   8 1411.61  608.89
   3  -5  -761860.66 2351.91
   3  -5  -763730.96 2261.27
   3   5  -769627.16 3445.41
  -3   5   775571.89 4332.77
  -3  -5   765339.24 2962.40
   3  -5  -611901.04  683.12
   3   5  -614153.33  989.59
   3  -5  -612385.45  520.76
  -3  -5   613385.80  946.46
   3  -5  -5  465.13  340.49
   3   5  -5  148.37  641.53
   3  -5  -5  874.15 1205.43
  -3   5   5  241.90  244.30
  -3  -5   5  185.99  361.95
   3  -5  -4 1695.09  438.27
   3   5  -4 1402.19  509.20
   3  -5  -4 1536.95  958.51
  -3   5   4 2047.65  369.61
  -3  -5   4 1788.98  539.17
   3   5  -3  192.09  459.92
   3  -5  -3 -313.82  703.70
   3   5  -3  766.36  468.64
  -3   5   3  270.38  343.66
  -3  -5   3  418.31  392.73
   3  -5  -2 2022.90  714.51
  -3  -5   2  422.94  302.01
  -3   5   2 1953.18  640.60
  -3  -5   2 1569.27  372.15
   3  -5  -1 3450.15  747.00
  -3  -5   1 2338.42  584.31
  -3  -5   1 2542.12  372.18
  -3  -5   1 2564.28  259.05
  -3   5   1 3126.06  604.83
   3  -5   019291.34 1577.22
  -3   5   022593.12 1509.42
  -3  -5   020025.64 1251.21
   3  -5   1  415.23  592.50
  -3   5  -1  333.87  577.04
  -3  -5  -1  136.86   71.02
  -3  -5  -1  100.41   74.78
  -3  -5  -1  377.27  428.07
   3  -5   2  567.68  742.27
   3   5   2  306.77  113.79
  -3   5  -2  316.11  657.80
  -3  -5  -2  217.12   74.55
  -3  -5  -2  752.32  463.64
   3  -5   3216183.312783.52
   3   5   3227931.510115.17
  -3   5  -3210822.711618.72
  -3  -5  -3205865.4 8902.78
  -3  -5  -3208972.210583.33
   3   5   4 4686.67  512.04
   3  -5   4 4213.84 1691.82
  -3  -5  -4 4488.19  295.28
  -3   5  -4 3474.60 1042.89
  -3  -5  -4 3016.19  692.55
   3   5   5  301.79  394.41
   3  -5   5  893.91 1203.20
  -3   5  -5 -397.01  402.49
  -3  -5  -5  288.13  434.75
  -3  -5  -5   70.14  231.05
   3  -5   6 -396.94  981.27
   3   5   6   80.87  409.60
  -3   5  -6  -88.94  649.17
  -3  -5  -6    3.95  420.53
   3  -5   7 2076.86 1078.00
   3   5   7 1589.30  563.56
  -3   5  -7  832.86  442.70
  -3  -5  -7 1379.25  506.07
   3  -5   8 4599.55 1342.40
   3   5   8 7940.79  838.16
  -3   5  -8 4801.83 1097.70
  -3  -5  -8 6457.72  731.44
   3  -5   923009.32 2020.26
   3   5   925721.84 1551.32
  -3   5  -921902.13 1779.08
  -3  -5  -923208.25 1340.55
   3  -5  10  500.39  809.91
   3   5  10 -110.07  446.84
  -3   5 -10  175.48  695.74
  -3  -5 -10  480.18  467.66
   3  -5  11 7016.65 1415.25
   3   5  11 8337.98  833.22
  -3   5 -11 6627.71 1160.24
  -3  -5 -11 6610.43  790.77
   3  -5  12   50.31  923.93
   3   5  12 -239.74  555.91
  -3   5 -12 -364.05  786.42
  -3  -5 -12 -201.53  493.71
   3  -5  1321966.29 2313.33
   3   5  1323433.51 1673.18
  -3   5 -1322036.14 2136.00
  -3  -5 -1322803.38 1487.01
   3  -5  14  388.04 1076.92
   3   5  14  -24.72  747.09
  -3   5 -14 1328.51  964.37
  -3  -5 -14  650.50  585.90
   3  -5  15  892.58  611.83
   3   5  15  443.35  755.24
  -3   5 -15   85.91  970.75
  -3  -5 -15  318.34  574.87
   3  -5  16 5195.95 1707.77
   3   5  16 7457.78 1777.39
  -3   5 -16 7419.27 1597.16
  -3  -5 -1610221.62 1068.05
   3  -5  17  -34.59  995.03
   3   5  17  112.55  751.00
  -3   5 -17  464.46  915.27
  -3  -5 -17 -136.56  582.22
   3  -5  18  921.86  684.54
   3   5  18  828.57  897.40
  -3   5 -18    8.00 1042.95
  -3  -5 -18  346.71  662.09
   3  -5  19 2533.20 1312.54
   3   5  19 2059.56 1041.77
  -3   5 -19 1370.55 1185.05
  -3  -5 -19 1569.04  783.69
   3   5  20   29.61 1012.43
   3  -5  20  601.56 1237.32
  -3   5 -20 1229.37 1105.31
  -3  -5 -20  898.22 1042.04
  -3  -7  20 1719.79 1071.19
  -3   7  20 1678.60  975.05
  -3   7  19 1600.65  876.63
  -3  -7  19  449.24  973.44
  -3  -7  18  550.27  921.26
  -3   7  18  632.86  888.62
  -3   7  1711646.30 1452.57
  -3  -7  1712610.39 1580.59
   3   7 -16   26.78  830.22
  -3   7  16 -195.05  757.34
  -3  -7  16  916.95  826.52
   3   7 -1524577.32 2044.51
  -3  -7  1522682.61 1927.38
  -3   7  1522941.48 1994.53
   3   7 -14 1290.50  687.82
  -3  -7  14  730.48  864.26
  -3   7  14 2054.42  905.51
   3   7 -13 6489.15  946.63
  -3   7  13 6927.62 1157.78
  -3  -7  13 5360.35 1112.57
   3  -7 -12 1346.45  340.39
   3   7 -12  510.12  676.41
  -3  -7  12  376.55 1024.98
  -3   7  12 1798.72  912.41
   3   7 -11 1620.68  895.10
   3  -7 -11 1149.29  323.08
  -3   7  11 2035.96  867.11
  -3  -7  11 1066.67  697.45
   3  -7 -10  174.60  279.72
   3   7 -10 -379.98  499.78
  -3   7  10  257.48  766.19
  -3  -7  10  331.48  567.33
   3  -7  -9 3810.69  428.80
   3   7  -9 4846.07  709.91
  -3   7   9 3541.75 1005.84
  -3  -7   9 4069.03  737.54
   3  -7  -8  587.22  320.80
   3   7  -8  854.66  548.58
  -3   7   8  800.79  835.90
  -3  -7   8  721.19  709.21
   3   7  -7 4713.59  711.96
   3  -7  -7 3975.84  479.28
  -3   7   7 5158.83 1565.95
  -3  -7   7 4581.51  881.69
   3  -7  -6 6494.85 1867.60
   3   7  -6 7338.22  853.15
  -3   7   6 6630.10  505.50
  -3  -7   6 4558.11  610.65
   3   7  -5 2332.06  610.23
   3  -7  -5 1052.47 1002.13
  -3   7   5 1535.37  416.37
  -3  -7   5 1550.55  405.95
   3  -7  -4 -240.06  712.85
   3   7  -4 -365.39  470.59
  -3   7   4  219.62  348.18
  -3  -7   4  -40.90  268.93
   3   7  -3  -95.32  525.88
   3  -7  -3  165.87  686.29
   3   7  -3  154.59  316.69
  -3   7   3  498.30  421.76
  -3  -7   3  428.13  330.98
   3  -7  -2 1316.57  703.50
   3   7  -2  810.87  328.07
   3   7  -2  988.70  623.14
  -3  -7   2 1290.85  253.79
  -3   7   2  719.46  534.75
   3  -7  -1 6800.01  878.28
  -3   7   1 4960.91  772.92
  -3  -7   1 5202.80  275.49
  -3  -7   1 4240.06  466.92
  -3  -7   1 4793.63  357.99
   3  -7   0 4978.99 1017.71
  -3  -7   0 8353.34  842.60
  -3   7   0 9635.43 1061.67
   3  -7   1 3427.25  889.01
  -3   7  -1 3377.51  932.86
  -3  -7  -1 5239.99  683.52
   3  -7   246106.87 3101.44
  -3  -7  -245948.15 2483.75
  -3   7  -246163.07 3180.66
   3  -7   393713.21 5123.93
  -3  -7  -385021.19 3521.53
  -3   7  -390567.66 4772.71
   3  -7   434453.84 3108.60
  -3   7  -432867.37 2452.07
  -3  -7  -430327.57 1760.67
   3  -7   526013.83 2630.41
   3   7   526977.00 1030.06
   3   7   529962.14 1057.66
  -3  -7  -528685.03 1492.37
  -3   7  -530120.95 2060.00
   3  -7   6  602.19 1162.36
   3   7   6  539.91  241.47
  -3   7  -6  296.61  439.57
  -3  -7  -6  246.12  280.88
  -3  -7  -6  529.03  482.91
   3  -7   7 4125.90 1456.13
   3   7   7 4846.51  447.32
  -3   7  -7 4647.06 1086.14
  -3  -7  -7 5591.56  667.22
   3  -7   8 -624.09  930.80
   3   7   8  150.86  345.84
  -3   7  -8  622.14  738.03
  -3  -7  -8 -280.18  438.68
   3  -7   9 2885.04 1453.02
   3   7   9 3829.14  622.79
  -3   7  -9 3687.93 1138.49
  -3  -7  -9 4794.45  651.03
   3  -7  10 1946.36 1191.75
   3   7  10  696.25  415.97
  -3   7 -10 1457.85  958.67
  -3  -7 -10 1162.67  534.53
   3  -7  11 4319.14 1559.12
   3   7  11 4696.75  872.63
  -3   7 -11 5465.72 1319.85
  -3  -7 -11 5289.84  707.49
   3  -7  12 -395.75 1069.12
   3   7  12 -509.03  696.02
  -3   7 -12 -598.23  978.19
  -3  -7 -12  -43.84  510.57
   3   7  1339306.46 2192.96
   3  -7  1335998.43 3224.22
  -3   7 -1332761.72 3008.75
  -3  -7 -1337807.76 2094.66
   3  -7  14 5581.15 1557.21
   3   7  14 3253.28  896.40
  -3   7 -14 3767.97 1385.37
  -3  -7 -14 3954.50  805.32
   3  -7  15 8713.08 1179.22
   3   7  1511850.30 1213.41
  -3  -7 -1513448.86 1127.06
  -3   7 -1512243.92 1830.05
   3  -7  16   63.89 1081.30
   3   7  16  682.06  961.91
  -3   7 -16 -662.00 1051.87
  -3  -7 -16  662.10  599.53
   3  -7  17 7275.44 1793.08
   3   7  17 9072.73 1275.27
  -3   7 -1711758.07 1809.85
  -3  -7 -17 9916.41 1058.53
   3  -7  18-1262.59 1077.02
  -3  -7 -18  -48.42  626.40
  -3   7 -18   20.38 1054.93
   3  -7  19 -675.43 1094.81
  -3   7 -19  141.29 1079.11
  -3  -7 -19  447.98  628.19
  -3  -9  19 1677.42 1130.11
  -3   9  19 1940.33  950.04
  -3  -9  18  160.91  996.72
  -3   9  18 1673.50  914.96
   3   9 -17  880.44 1059.95
  -3   9  17  484.72  848.41
  -3  -9  17  820.04  964.11
   3   9 -16  116.37  939.48
  -3  -9  16   -0.04  833.46
  -3   9  16   -2.62 1004.60
   3   9 -15 1685.48  833.22
  -3   9  15 1687.77  925.66
  -3  -9  15 1068.69  980.33
   3   9 -14 4274.67  894.98
  -3   9  14 1418.08  959.35
  -3  -9  14 1403.56  942.48
   3   9 -13  451.65  648.08
  -3   9  13 -579.28  803.48
  -3  -9  13  382.94  709.68
   3   9 -12  354.18  642.16
  -3   9  12  246.69  775.87
  -3  -9  12  -79.24  680.58
   3  -9 -11 8402.40  570.05
   3   9 -11 7927.60 1091.21
  -3   9  11 6364.30 1278.15
  -3  -9  11 6964.83 1457.83
   3   9 -10 1658.95  778.51
   3  -9 -10 1619.13  479.31
  -3   9  10  532.09  929.91
  -3  -9  10 1331.04  727.56
   3   9  -918801.56 1424.54
   3  -9  -916923.21  852.70
  -3   9   916123.60 1750.97
  -3  -9   917313.48 1285.46
   3  -9  -8 1084.85  478.19
   3   9  -8  773.82  659.96
  -3  -9   8  462.76  577.68
  -3   9   8 2089.86  954.11
   3  -9  -7 1235.18  391.65
   3   9  -7 1169.15  688.39
  -3  -9   7  525.68  531.27
  -3   9   7 2075.19  913.26
   3   9  -6 1006.29  582.34
   3  -9  -6-2253.01 1283.00
  -3   9   6  -59.52  535.22
  -3  -9   6  306.18  434.03
   3   9  -5 2413.24  671.09
   3  -9  -5 2148.21 1013.97
  -3   9   5 1592.59  655.91
  -3  -9   5 1140.31  614.55
   3   9  -4 2906.51  702.21
   3  -9  -4 1730.24  937.82
  -3  -9   4 2398.23  596.82
  -3   9   4 2188.16  821.08
   3  -9  -310937.19 1186.29
   3   9  -310019.59 1022.24
  -3   9   3 9873.07  883.34
  -3  -9   311283.96  766.51
   3  -9  -2  763.67  634.05
   3   9  -2  707.08  208.71
   3   9  -2  676.34  609.87
  -3   9   2  721.50  537.94
  -3  -9   2  555.82  313.51
   3  -9  -1 5862.34  823.75
   3   9  -1 3950.70  491.15
  -3   9   1 4199.06  755.15
   3  -9   020831.66 1552.08
  -3   9   022064.42 1547.83
  -3  -9   021561.54 1509.23
   3  -9   117968.98 1370.31
  -3   9  -117224.39 1365.29
  -3  -9  -115944.54 1192.22
   3  -9   2 5106.00  976.39
  -3   9  -2 6792.17  680.97
  -3  -9  -2 9293.87  893.04
   3  -9   311873.14 1234.07
  -3  -9  -311239.46  960.44
  -3   9  -3 9301.81 1239.03
   3  -9   4  601.41  771.81
  -3   9  -4 -481.60  652.81
  -3  -9  -4    8.31  448.37
   3  -9   5 5490.04 1225.51
  -3  -9  -5 3843.11  694.27
  -3   9  -5 3598.33 1022.60
   3   9   6   29.43   83.00
   3  -9   6  571.15 1025.31
  -3  -9  -6 -199.83  451.55
  -3   9  -6  -87.59  709.56
   3   9   713139.03  515.67
   3  -9   714752.37 2203.63
  -3  -9  -716366.23 1135.68
  -3   9  -714798.48 1608.12
   3   9   8 9288.63  528.16
   3  -9   811270.30 2101.28
  -3  -9  -810786.98 1007.20
  -3   9  -8 7603.34 1512.67
   3   9   910050.13  677.49
   3  -9   9 6399.18 2183.90
  -3  -9  -910906.85  992.13
  -3   9  -912980.29 1542.39
   3  -9  10 9919.54 2111.99
  -3   9 -10 4870.06 1645.54
  -3  -9 -1011058.09 1046.95
   3  -9  1111937.83 1975.32
  -3  -9 -11 8786.43  976.25
  -3   9 -1113622.37 1791.95
   3  -9  12 2881.17 1862.50
  -3   9 -12 3136.56 1493.43
  -3  -9 -12 6236.42  812.16
   3  -9  1322077.23 2661.72
  -3   9 -1319695.81 2276.07
  -3  -9 -1318534.10 1373.48
   3  -9  14 5175.59 2029.73
  -3   9 -14 7950.38 1731.90
  -3  -9 -14 8667.52 1015.64
   3  -9  1524996.58 3021.56
  -3  -9 -1529525.97 2224.75
  -3   9 -1527955.59 2890.92
   3  -9  16 2597.94 1519.53
  -3   9 -16 2839.73 1356.38
  -3  -9 -16 2725.90  759.70
   3  -9  17  437.02 1315.43
  -3   9 -17 1194.06 1154.70
  -3  -9 -17  789.07  663.67
   3  -9  18 -889.78 1292.81
  -3   9 -18 -504.91 1197.45
  -3  -9 -18 -954.75  640.42
  -3  11  18  557.34  912.52
  -3 -11  18 1377.02 1108.09
   3  11 -17 5005.44 1515.70
  -3  11  17 2680.11 1130.93
  -3 -11  17 6934.94 1331.67
   3  11 -16 -803.65 1052.06
  -3  11  16  498.90  797.78
  -3 -11  16  711.86  908.14
   3  11 -15 4592.83 1058.31
  -3  11  15 4071.12 1124.76
  -3 -11  15 4154.33 1185.45
   3  11 -14 1545.79  809.53
  -3  11  14  433.61  843.09
  -3 -11  14  372.76  875.05
   3  11 -13 3690.69  962.61
  -3  11  13 2291.81 1456.02
  -3 -11  13 3468.64 1047.34
   3  11 -12  662.28  836.75
  -3 -11  12 1087.87  858.21
  -3  11  12 2664.43  930.40
   3 -11 -1166836.00 3330.67
   3  11 -1166387.38 4024.52
  -3  11  1174681.73 4663.25
  -3 -11  1165763.16 4072.79
   3  11 -1012161.41 1412.00
   3 -11 -10 9751.29 1044.40
  -3  11  1010596.08 1553.44
  -3 -11  1011907.17 1846.76
   3 -11  -918792.35 1355.89
   3  11  -920016.03 1767.23
  -3  11   918417.93 2582.93
  -3 -11   921664.71 1693.38
   3 -11  -8134902.6 7475.36
   3  11  -8136645.6 8173.81
  -3  11   8125443.1 8843.26
  -3 -11   8124658.8 7673.02
   3 -11  -725001.40 1467.45
   3  11  -724794.81 1915.65
  -3 -11   722784.61 1626.55
  -3  11   720877.70 2219.91
   3  11  -6276029.217264.93
   3 -11  -6284236.122182.56
  -3  11   6267035.515901.90
  -3 -11   6260842.116918.56
   3 -11  -536930.24 3707.67
   3  11  -537088.55 2314.13
  -3  11   539622.70 2527.98
  -3 -11   542626.73 2368.86
   3 -11  -4 5597.02 1436.85
   3  11  -4 3482.13  832.84
  -3  11   4 2546.94  720.47
  -3 -11   4 3483.31  808.31
   3 -11  -3  419.17  770.49
   3  11  -3  837.53  701.23
  -3  11   3 1111.68  635.52
   3  11  -2 -140.39  599.26
   3 -11  -2 -157.83  613.35
  -3  11   2  343.56  537.42
   3 -11  -110596.41 1190.12
  -3  11   1 9151.03 1047.10
   3 -11   0 5404.15  948.86
  -3  11   0 3657.58  996.95
  -3 -11   0 8603.08 1006.44
   3 -11   1 -461.36  601.06
  -3  11  -1  540.04  644.32
  -3 -11  -1  428.42  355.41
   3 -11   2 1239.57  704.24
  -3  11  -2 -175.27  764.55
  -3 -11  -2  876.90  615.08
   3 -11   3 -310.65  659.07
  -3  11  -3  -61.12  759.07
  -3 -11  -3 -614.60  579.76
   3 -11   4 1496.71  952.99
  -3  11  -4 2360.67  985.96
  -3 -11  -4 2384.09  702.43
   3 -11   524726.92 2264.05
  -3  11  -526303.86 2207.37
  -3 -11  -526064.73 1684.51
   3 -11   6 8153.70 1917.44
  -3  11  -611026.19 1588.24
  -3 -11  -611793.81 1152.56
   3 -11   730010.69 2944.77
  -3  11  -726953.95 2481.26
  -3 -11  -727367.93 1789.61
   3 -11   8 6078.48 1996.36
  -3 -11  -8 7940.99  976.47
  -3  11  -8 4619.46 1411.90
   3 -11   915031.87 2551.23
  -3 -11  -913315.01 1199.41
  -3  11  -913334.08 1841.15
   3 -11  1031514.58 4014.80
  -3  11 -1031086.51 2999.69
  -3 -11 -1030794.81 2101.15
   3 -11  11  350.00 1517.47
  -3  11 -11 1049.42 1087.45
  -3 -11 -11  667.33  639.65
   3 -11  1229703.58 3854.73
  -3  11 -1226991.71 3017.15
  -3 -11 -1234539.07 2234.93
   3 -11  13-1095.85 1478.59
  -3  11 -13  195.60 1095.47
  -3 -11 -13 1682.45  633.62
   3 -11  14 7315.61 2072.06
  -3  11 -14 4465.41 1802.87
  -3 -11 -1412006.27 1131.19
   3 -11  15  972.96 1520.60
  -3 -11 -15 2444.81  718.84
  -3  11 -15 1286.89 1298.17
   3 -11  16 -145.31 1336.50
  -3  11 -16 1368.72 1129.07
  -3 -11 -16  313.53  612.74
   3 -11  17 5100.20 1788.11
  -3 -11 -17 6583.82  937.50
  -3  11 -17 6679.89 1699.09
   3  13 -16 1382.88 1341.48
   3  13 -15 3845.40 1119.97
   3  13 -14 2453.62 1017.66
   3  13 -13  284.25  852.56
   3  13 -12 4266.58 1105.37
  -3  13  12 2987.47 1071.39
   3  13 -11 2898.42 1109.87
  -3  13  11 4295.28 1026.94
   3  13 -10 4346.81 1134.95
   3 -13 -10 3490.67  908.35
  -3  13  10 2850.80 1082.44
   3 -13  -979562.18 4106.06
   3  13  -979554.58 4896.07
  -3  13   978255.90 5330.45
   3 -13  -8  681.66  772.14
   3  13  -8 1304.61  798.99
  -3  13   8 -634.42  959.39
   3 -13  -739190.61 2212.30
   3  13  -732247.84 2446.91
  -3  13   731825.72 2796.17
   3  13  -6 -505.25  676.38
   3 -13  -6  375.18 1235.87
  -3  13   6  373.18  549.62
   3  13  -511124.03 1311.33
   3 -13  -516692.43 2294.60
  -3  13   511031.42 1251.87
   3 -13  -412591.73 2378.99
   3  13  -419785.09 1738.09
  -3  13   417164.69 1407.69
   3  13  -323877.68 1915.53
   3 -13  -322764.15 2085.81
  -3  13   325705.19 1755.76
   3 -13  -2  -38.70  783.76
   3  13  -2 1833.73  767.11
  -3  13   2 -615.00  721.46
   3 -13  -1 2843.56  881.19
  -3  13   1 2594.89  853.61
  -3 -13   1 2318.83  538.15
   3 -13   0  -57.58  774.16
  -3  13   0 1422.62  802.25
  -3 -13   0 2003.86  855.81
   3 -13   1 1379.00  774.65
  -3  13  -1  645.22  846.05
  -3 -13  -1 1692.20  780.33
   3 -13   2 1809.93  726.86
  -3  13  -2  -24.12  866.04
  -3 -13  -2  -29.44  732.46
   3 -13   3  384.59 1066.75
  -3  13  -3 -361.01  892.57
  -3 -13  -3 1241.99  719.32
   3 -13   4 4049.41 1222.07
  -3  13  -411942.62 1418.14
  -3 -13  -411141.78 1223.06
   3 -13   5 9903.12 1425.04
  -3 -13  -512932.55 1278.75
  -3  13  -511494.37 1553.97
   3 -13   6 3825.74 1215.12
  -3  13  -6 3569.33 1190.12
  -3 -13  -6 4457.70  948.88
   3 -13   735250.73 3028.55
  -3  13  -735194.54 2826.21
  -3 -13  -733133.09 2198.72
   3 -13   8  701.55 1222.18
  -3 -13  -8  711.79  686.27
   3 -13   910962.67 2126.87
  -3  13  -913458.35 1243.44
  -3 -13  -914187.40 1329.38
   3 -13  10 6405.86 2144.21
  -3  13 -10 6574.52 1658.10
  -3 -13 -1012245.40 1244.82
   3 -13  11 -551.77 1302.49
  -3 -13 -11   41.40  592.60
  -3  13 -11 -440.88  917.51
   3 -13  12 -870.60 1365.82
  -3 -13 -12  327.05  614.05
  -3  13 -12  371.95  568.18
   3 -13  13 2616.80 1296.28
  -3  13 -13 -568.70  956.83
  -3 -13 -13 -248.92  549.56
   3 -13  14  447.61 1415.25
  -3  13 -14 -701.84 1039.75
  -3 -13 -14  479.52  598.47
   3 -13  15 8094.78 2120.59
  -3  13 -15 4224.84 1587.48
  -3 -13 -15 6068.35  938.08
   3  15 -13 1459.63 1012.30
   3  15 -12 1646.34 1019.49
   3  15 -11 1481.09  986.43
   3  15 -10 2284.17 1010.77
   3 -15  -9  500.40  625.53
   3  15  -9 2060.05  905.58
   3  15  -8-2266.54  782.07
   3 -15  -8  105.63  653.86
   3 -15  -7 5885.29 1025.32
   3  15  -7 5385.62 1107.23
   3  15  -611231.55 1209.82
   3 -15  -6 2616.81  590.65
   3  15  -5-1657.55  853.92
  -3  15   5  114.00  763.31
   3  15  -4 1493.24  867.79
  -3  15   4  238.64  777.30
   3  15  -3 4266.83 1084.16
  -3  15   3 3203.03  887.79
  -3 -15   2  107.35  497.07
  -3  15   2 1225.65  813.71
   3 -15  -1 3464.79 1086.15
  -3 -15   1 6546.59 1169.42
  -3  15   1 5288.02 1154.35
   3 -15   0 -593.14 1066.41
  -3  15   0  941.90  891.25
  -3 -15   0 1663.17  879.35
   3 -15   1 7614.50 1201.51
  -3  15  -1 4479.98 1267.05
  -3 -15  -110005.74 1268.98
   3 -15   2 7324.90 1222.70
  -3 -15  -212852.10 1479.66
  -3  15  -2 6063.55 1375.06
   3 -15   3 -329.77  751.59
  -3  15  -3-1141.91  847.25
  -3 -15  -3 -176.91  833.09
   3 -15   4 2499.94  968.45
  -3  15  -4 2141.49 1147.59
  -3 -15  -4 3765.81 1003.58
   3 -15   5   32.82 1043.26
  -3 -15  -5  411.47  771.29
   3 -15   6  709.33  856.61
  -3  15  -6  184.53 1014.59
  -3 -15  -6 1690.89  858.73
   3 -15   713004.51 1519.79
  -3 -15  -710968.80 1401.43
   3 -15   8  676.91 1023.99
  -3  15  -8 -760.64  986.69
  -3 -15  -8 2264.42  822.94
   3 -15   9 5758.70 1566.72
  -3  15  -9 6852.31  901.74
  -3 -15  -9 8807.98 1147.01
   3 -15  10  465.63 1162.26
  -3  15 -10  139.84  977.78
  -3 -15 -10 1462.00  757.80
   3 -15  11  881.37 1257.78
  -3  15 -11 1696.41 1007.05
  -3 -15 -11  370.16  738.88
   3 -15  12 3445.38 1372.31
  -3 -15 -12 1836.77  809.99
  -3  15 -12  615.03 1154.31
   3  17  -9 5611.72 1221.45
   3 -17  -8 1573.62  823.24
   3  17  -8  488.68 1007.94
   3 -17  -7 1702.20  885.54
   3  17  -7 1033.87  988.82
   3 -17  -6 -198.35  803.40
   3  17  -6 -160.73  828.42
   3  17  -5  -90.42  868.46
   3 -17  -5  567.17  494.37
  -3  17   5  146.16  755.64
   3  17  -4 1168.08  905.21
  -3  17   4  392.29  860.62
  -3 -17   3  403.66  537.05
  -3  17   3 2422.59  893.94
  -3  17   2  253.37  709.50
  -3 -17   2 -211.93  808.76
  -3 -17   1 2063.15  951.49
  -3  17   1  612.12  878.19
  -3  17   0  541.37  825.89
  -3 -17   0  -41.33  828.51
  -3 -17  -1 2741.20 1055.14
  -3  17  -1  793.73 1018.33
  -3  17  -2 2602.24 1103.57
  -3 -17  -2 1673.70 1086.75
  -3  17  -3 2594.87 1038.52
  -3 -17  -3 1266.46 1121.26
  -3  17  -4 1322.22  592.63
  -3 -17  -4 1334.90  962.10
  -3  17  -5 -361.27  967.39
  -3 -17  -5 1881.05  931.72
  -3  17  -6  803.38 1027.25
  -3 -17  -6 1298.47  929.96
  -3  17  -7 4699.01 1269.03
  -3 -17  -7 3876.75 1135.02
  -3  17  -8 1956.22 1159.78
  -3 -17  -8 1001.58  911.35
  -4   0  21  263.21  852.81
  -4   0  20 8153.99 1316.84
  -4   0  19 -813.66  862.85
  -4   0  1813508.56 1524.34
  -4   0  17 -185.20  764.13
  -4   0  1699696.58 5639.77
  -4   0  15  778.81  866.50
  -4   0  14586377.243302.34
  -4   0  13   40.47  657.95
   4   0 -1222263.18  726.23
  -4   0  1226835.51 1811.71
   4   0 -11    6.53   86.12
  -4   0  11  189.69  614.96
   4   0 -10 7058.08  210.94
  -4   0  10 7115.69  197.85
  -4   0  10 9131.18 1139.44
  -4   0   9  565.72  734.56
  -4   0   8   10.81  647.94
  -4   0   7   -7.74  699.32
  -4   0   611701.68  313.66
  -4   0   611519.35  361.85
  -4   0   613377.01 1478.98
  -4   0   5  -36.15   91.21
  -4   0   5  172.40  796.32
  -4   0   5 -169.90  123.01
   4   0  -445135.16 3848.69
  -4   0   446042.28 1381.15
   4   0  -3-1118.99  813.28
   4   0  -3   29.75  188.74
  -4   0   3  117.26  168.02
   4   0  -257744.13 2102.19
   4   0  -258987.92 3150.49
  -4   0   256626.08 1962.25
   4   0  -1 -331.35  588.20
   4   0  -1   49.15  205.13
  -4   0   1  199.20  272.12
   4   0   072358.01 3368.64
  -4   0   068449.48 2718.03
   4   0   1   44.55  720.12
  -4   0  -1  229.50  384.36
   4   0   249280.84 2383.90
  -4   0  -250325.19 2163.19
   4   0   3  -78.21  646.07
  -4   0  -3  326.77  423.02
   4   0   487469.34 4739.48
  -4   0  -479501.93 3554.06
   4   0   5  230.57 1043.75
  -4   0  -5   55.15  498.31
   4   0   6350047.322944.42
  -4   0  -6353696.321196.28
   4   0   7  -20.13  819.85
  -4   0  -7  -34.46  492.78
   4   0   851341.61 3024.12
  -4   0  -849948.99 2507.08
   4   0   9 -899.11  757.59
  -4   0  -9 -367.97  537.73
   4   0  10  873.98  821.30
  -4   0 -10 1712.52  634.67
   4   0  11  623.82  781.94
  -4   0 -11  182.56  585.72
   4   0  1239663.00 2735.01
  -4   0 -1240274.89 2393.61
   4   0  13 -454.45  873.65
  -4   0 -13   46.69  668.64
   4   0  1460597.33 4244.90
  -4   0 -1460247.76 3498.48
   4   0  15  127.98 1033.46
  -4   0 -15  847.18  740.46
   4   0  1639705.63 3211.49
  -4   0 -1636622.88 2594.96
   4   0  17 -210.43  998.81
  -4   0 -17  297.52  751.33
   4   0  18 2175.52 1235.62
  -4   0 -18 1256.43  953.46
   4   0  19  -44.81  987.48
  -4   0 -19   40.19  732.79
   4   0  2017506.33 2237.89
  -4   0 -2016938.78 1830.02
  -4  -2  21  567.33  894.53
  -4   2  21 1228.02  971.80
  -4   2  20  649.49 1000.85
  -4  -2  20 2771.45  972.15
  -4   2  19 2287.61 1024.52
  -4  -2  19 1603.67  957.00
  -4  -2  18 9386.47 1250.11
  -4   2  18 7361.36 1301.17
  -4   2  17 1060.72  866.80
  -4  -2  17 -365.77  769.04
  -4  -2  16101990.6 5772.69
  -4   2  16110187.2 6293.12
  -4   2  15 2286.93  943.56
  -4  -2  15 1149.69  886.36
  -4   2  14 9616.36 1251.48
  -4  -2  14 8020.65 1188.72
   4   2 -1349513.43 2422.06
  -4   2  1344658.76 3369.69
  -4  -2  1353587.48 3483.39
   4   2 -1230787.29 1318.39
  -4   2  1226637.56 2007.87
  -4  -2  1227623.73 1907.14
   4   2 -11 2752.10  386.62
  -4   2  11 2392.45  966.01
  -4  -2  11 1230.40  780.73
   4   2 -10   -4.61  263.58
  -4   2  10    6.42  709.27
  -4  -2  10  347.59  589.64
   4   2  -9  474.02  283.79
  -4   2   9  135.24  835.09
  -4  -2   9  671.89  684.79
  -4  -2   9  852.05  204.33
   4   2  -861611.99 2212.34
  -4  -2   855990.56 2118.05
  -4  -2   857904.49 3025.97
  -4   2   862251.39 3516.91
  -4   2   7 2121.65 1057.45
  -4  -2   7 2076.66  800.18
  -4  -2   7 2429.84  382.28
  -4  -2   6 5213.37  441.15
  -4  -2   6 6819.17  946.49
  -4   2   6 6326.55 1384.37
  -4  -2   6 5825.19  505.17
   4  -2  -535900.49 3750.20
  -4  -2   533127.08 1463.28
  -4  -2   533163.08 1372.67
  -4  -2   534287.76 2167.32
   4  -2  -487181.90 2838.34
   4  -2  -480215.67 4983.28
  -4   2   487276.32 3031.41
  -4  -2   479331.28 3079.05
  -4  -2   484606.88 4177.96
  -4  -2   485486.07 3418.31
   4  -2  -314513.80  590.26
   4  -2  -315712.31 1657.62
  -4  -2   316927.34 1751.41
  -4   2   316174.96  697.32
  -4  -2   320126.34  985.01
   4  -2  -2169649.1 7341.31
   4  -2  -2159187.5 8438.44
   4   2  -2172161.0 9351.54
  -4  -2   2160256.1 6955.71
  -4   2   2166754.3 7348.65
   4  -2  -158913.03 3581.54
   4  -2  -154382.93 2469.49
   4   2  -162359.84 3909.51
  -4  -2   158976.91 2631.03
  -4   2   159237.54 2956.33
   4   2   0  956.26  477.39
   4  -2   0 1060.19  621.90
  -4   2   0  627.94  417.64
  -4  -2   0 1175.19  571.40
   4  -2   130806.54 2048.77
   4   2   132388.39 1685.66
  -4   2  -133873.85 1803.45
  -4  -2  -133399.47 1705.61
  -4   2  -2596433.440762.16
   4  -2   3  892.58 1060.01
   4   2   3 3203.19  906.12
  -4   2  -3 2782.42  704.31
  -4  -2  -3 5126.28  612.58
   4  -2   433118.98 2746.93
   4   2   434466.78 2113.29
  -4   2  -433951.55 1827.23
  -4  -2  -432184.85 1268.88
   4  -2   5 1147.01 1247.18
   4   2   5  542.95  832.79
  -4   2  -5 -211.18  571.84
  -4  -2  -5  355.20  472.98
   4  -2   6190847.811975.46
   4   2   6197156.710673.76
  -4  -2  -6182960.7 9386.57
  -4   2  -6188988.0 9956.41
   4  -2   7  720.16 1003.21
   4   2   7    1.18  700.59
  -4   2  -7  607.33  595.37
  -4  -2  -7  439.74  477.65
   4  -2   8 3250.32 1235.26
   4   2   8 4534.18 1175.57
  -4  -2  -8 3606.05  679.98
  -4   2  -8 4729.24  780.69
   4   2   958743.76 3439.73
   4  -2   955196.57 3988.23
  -4   2  -951214.87 3101.52
  -4  -2  -954100.08 2998.80
   4   2  10  967.25  691.53
   4  -2  10  997.74  921.66
  -4   2 -10 1466.14  697.74
  -4  -2 -10 1110.75  569.28
   4  -2  11 5215.21 1412.10
   4   2  11 9927.28 1215.13
  -4   2 -11 9886.45 1133.29
  -4  -2 -11 8174.56 1013.50
   4   2  1238957.25 2531.93
   4  -2  1235054.24 2820.29
  -4   2 -1236804.10 2326.83
  -4  -2 -1235331.86 2112.95
   4  -2  13 3761.55 1216.86
   4   2  13 2869.46 1062.54
  -4  -2 -13 1918.56  787.81
  -4   2 -13 2282.50  899.36
   4  -2  1414728.61 1920.89
   4   2  1414580.41 1702.37
  -4   2 -1414418.97 1490.74
  -4  -2 -1413346.21 1305.15
   4   2  15  817.38  986.21
   4  -2  15  727.43 1156.67
  -4   2 -15  264.27  834.13
  -4  -2 -15 1650.65  733.62
   4  -2  16  465.85 1064.70
   4   2  16  462.98  908.91
  -4  -2 -16  300.27  708.53
  -4   2 -16  114.31  795.30
   4  -2  17 2224.12 1220.93
   4   2  17 1180.22 1108.32
  -4   2 -17  605.14  943.54
  -4  -2 -17 1297.00  850.71
   4  -2  1819520.74 2354.33
   4   2  1818377.35 2117.70
  -4  -2 -1817166.86 1680.60
  -4   2 -1819953.83 1949.69
   4   2  19 -670.06  976.18
   4  -2  19  142.01 1074.04
  -4   2 -19  472.24  857.40
  -4  -2 -19  511.05 1011.94
   4  -2  20 7839.71 1866.88
   4   2  2010319.84 1762.05
  -4   2 -20 7645.97 1527.15
  -4  -2 -20 8573.92 1352.91
  -4   4  21 3661.45 1080.72
  -4  -4  21   37.96 1033.84
  -4   4  20   30.63  819.43
  -4  -4  20   83.43  825.99
  -4  -4  19  371.42  831.13
  -4   4  19  248.72  827.91
  -4   4  18 5552.35 1369.44
  -4  -4  18 8920.73 1295.88
  -4   4  17 3104.26 1162.40
  -4  -4  17 5770.19 1133.45
  -4   4  16 9744.64 1344.13
  -4  -4  1610150.80 1332.28
  -4  -4  1519502.26 1794.93
  -4   4  1518981.68 1938.13
   4   4 -1421208.29 1176.42
  -4   4  1415271.30 1747.20
  -4  -4  1416433.68 1586.80
   4   4 -13 8251.40  893.92
  -4   4  13 3076.91 1189.48
  -4  -4  13 8443.80 1143.29
   4   4 -1210660.55  897.00
  -4  -4  1212570.81 1128.76
  -4   4  1210581.03  907.56
   4   4 -11  288.25  461.98
  -4   4  11  386.67  787.84
  -4  -4  11  324.19  590.45
   4   4 -10    1.93  295.38
  -4   4  10 -725.72  768.88
  -4  -4  10  285.14  543.82
   4   4  -9 8288.89  742.29
  -4  -4   9 2963.28  864.10
  -4   4   9 4739.44 1211.93
   4   4  -819020.31 1095.93
  -4  -4   818314.88 1258.03
  -4   4   817635.35 1789.64
   4   4  -715910.60 1023.68
  -4   4   717367.86 1941.71
  -4  -4   716655.25 1239.60
   4   4  -6385080.222591.19
   4  -4  -6371157.627359.46
  -4  -4   6377522.822461.43
   4  -4  -5 2911.20  292.90
   4  -4  -5 2639.47 1653.15
  -4   4   5 3229.65  309.43
  -4  -4   5 2098.32  777.90
   4  -4  -4400637.722536.59
   4  -4  -4412846.527222.78
  -4  -4   4388023.822552.57
  -4   4   4408403.922957.76
  -4  -4   4399159.524398.74
   4  -4  -323753.64 2067.58
  -4  -4   323906.67 1181.86
  -4   4   323943.34 1444.08
  -4  -4   322128.69 1301.16
   4  -4  -212034.95 1322.43
  -4   4   211716.75 1023.54
  -4  -4   2 9368.98  696.18
  -4  -4   210410.02  936.72
   4  -4  -118462.16 1607.93
  -4   4   118235.03 1460.01
  -4  -4   115132.43 1173.44
  -4  -4   114134.42  820.66
  -4  -4   118692.99 1070.26
   4  -4   0 7543.33  974.77
   4   4   0 7370.01  975.88
  -4   4   0 6101.51  782.87
  -4  -4   0 6252.61  465.39
  -4  -4   0 7910.12  681.27
   4   4   1 8876.70  715.24
   4  -4   1 9193.09 1111.13
  -4  -4  -1 6826.73  719.04
  -4  -4  -1 9409.84  805.22
  -4   4  -1 8866.16 1254.70
   4   4   247824.97 1759.25
   4  -4   249613.43 2856.57
  -4   4  -250074.44 2594.50
  -4  -4  -249727.23 2283.52
  -4  -4  -249878.53 1995.57
   4  -4   330266.16 2646.30
   4   4   326147.85 1410.28
  -4   4  -330016.77 1981.27
  -4  -4  -330750.62 1737.24
   4   4   4 1601.66  648.05
   4  -4   4 1737.94 1249.06
  -4   4  -4 1415.32  724.84
  -4  -4  -4  849.45  347.56
  -4  -4  -4 1694.67  536.37
   4  -4   5 9044.72 2188.40
   4   4   511549.40 1105.26
  -4  -4  -513075.80 1017.26
  -4   4  -5 9289.78 1187.41
   4   4   625087.50 1795.92
   4  -4   622440.07 2643.57
  -4  -4  -622225.30 1290.74
  -4   4  -622435.57 1593.00
   4   4   742493.46 2366.52
   4  -4   734662.70 3426.53
  -4   4  -734242.74 2393.51
  -4  -4  -738849.47 2159.39
   4  -4   8 3125.67 1275.19
   4   4   8 5186.52  697.07
  -4   4  -8 4208.79  865.17
  -4  -4  -8 4305.60  660.86
   4  -4   9  223.40  994.34
   4   4   9  464.11  525.20
  -4   4  -9  396.45  672.70
  -4  -4  -9  460.24  515.36
   4  -4  1064567.79 3400.54
   4   4  1067680.49 3375.75
  -4   4 -1065826.08 3685.57
  -4  -4 -1067750.82 3293.30
   4  -4  11 -524.14  975.82
   4   4  11  432.95  572.56
  -4  -4 -11  -27.06  512.14
  -4   4 -11  301.00  690.58
   4  -4  1218939.99 2250.20
   4   4  1221739.31 1629.77
  -4   4 -1221771.63 1884.01
  -4  -4 -1220981.60 1459.28
   4   4  13 3730.53 1425.48
   4  -4  13 4158.40 1498.55
  -4   4 -13 4196.26 1172.19
  -4  -4 -13 4139.61  831.49
   4   4  14 6431.68 1082.96
   4  -4  14 4851.11  890.13
  -4   4 -14 4539.36 1181.42
  -4  -4 -14 3908.87  872.41
   4  -4  15  485.84 1148.12
   4   4  15 2466.20  858.92
  -4  -4 -15 -242.05  694.38
  -4   4 -15 1235.48  943.95
   4  -4  16 3626.78 1393.77
   4   4  16 3616.15 1077.80
  -4  -4 -16 3335.70  849.15
  -4   4 -16 2924.67 1155.12
   4  -4  17   75.47 1180.19
   4   4  17  899.69 1304.47
  -4  -4 -17  636.88  718.38
  -4   4 -17 1313.80  984.72
   4  -4  18 2528.73 1339.86
   4   4  18 1944.46 1064.56
  -4   4 -18  706.20 1092.64
  -4  -4 -18 2182.52  852.03
   4  -4  19 2703.92 1304.91
   4   4  19  469.53 1072.10
  -4   4 -19  157.99 1098.50
  -4  -4 -19 1798.15  832.35
   4  -4  20  237.59 1243.91
   4   4  20-1674.15 1010.93
  -4   4 -20 -563.11 1088.81
  -4  -4 -20 -589.57  797.30
  -4  -6  20 1251.04  967.07
  -4   6  20-1762.74  869.01
  -4  -6  19  -87.66  824.11
  -4   6  19   -9.09  809.57
  -4   6  18-1851.89  908.10
  -4  -6  18  -71.94  919.77
  -4  -6  17 1511.38  561.10
  -4   6  17  931.81  954.24
  -4   6  16  674.65  928.07
  -4  -6  16 1018.01  863.00
   4   6 -15 1958.82  625.44
  -4   6  15 1305.55 1027.93
  -4  -6  15 3609.01  980.57
   4   6 -14   34.50  698.58
  -4   6  14  646.89  887.56
  -4  -6  14  866.94  755.23
   4   6 -13 -252.56  463.20
  -4   6  13 -153.15  823.14
  -4  -6  13  178.76  677.69
   4   6 -12  936.12  696.20
  -4   6  12  360.60  921.99
  -4  -6  12  810.26  703.94
   4   6 -11 4338.02  838.15
  -4   6  11 2565.09 1199.03
  -4  -6  11 2102.73  793.80
   4   6 -10 4071.05  822.63
   4  -6 -10 3486.20  215.32
  -4   6  10 2821.11 1092.82
  -4  -6  10 2510.38  703.69
   4  -6  -9  228.32  173.33
   4   6  -9  599.72  601.89
  -4   6   9   65.72  852.43
  -4  -6   9 -392.29  469.89
   4   6  -8   78.69  403.64
   4  -6  -8  292.99  185.24
  -4   6   8  535.76  895.14
  -4  -6   8 -222.17  429.25
   4  -6  -718218.48  794.39
   4   6  -718564.55 1069.60
  -4   6   712739.43 1196.00
  -4  -6   716984.47 1097.15
   4  -6  -6 6518.09 1753.65
   4   6  -6 6484.87  705.72
  -4   6   6 7844.20  557.52
  -4  -6   6 7346.00  615.65
   4  -6  -5 5877.25 1507.78
   4   6  -5 6766.82  738.67
  -4   6   5 8159.67  662.06
  -4  -6   5 6789.18  566.08
   4  -6  -4115992.6 6585.38
  -4   6   4121069.1 5527.31
  -4  -6   4123725.1 5545.11
   4  -6  -3 2984.64 1032.17
  -4   6   3 3016.90  735.78
  -4  -6   3 2297.95  633.86
  -4  -6   3 4463.55  542.78
   4  -6  -2 3395.50  949.09
  -4   6   2 3136.37  631.55
  -4  -6   2 3526.67  607.80
  -4  -6   2 3784.60  493.99
  -4  -6   2 3493.50  411.15
   4  -6  -123458.76 1877.43
  -4   6   125196.09 1591.19
  -4  -6   119269.05  758.50
  -4  -6   121219.92  884.41
  -4  -6   123825.21 1364.06
   4  -6   0 6172.05  910.72
  -4  -6   0 7049.40  656.97
  -4  -6   0 4893.21  272.77
  -4  -6   0 4278.27  278.31
  -4   6   0 5040.07  874.26
   4  -6   1135834.1 8255.62
  -4   6  -1136075.6 8329.47
  -4  -6  -1139925.7 7349.63
   4  -6   234219.59 2178.40
  -4   6  -237730.06 2272.50
  -4  -6  -233927.41 1724.74
   4  -6   320280.03 2054.39
  -4   6  -323324.72 1877.75
  -4  -6  -325936.62 1592.51
   4  -6   432063.25 2463.86
   4   6   431547.63 1002.21
  -4   6  -433373.73 2128.26
  -4  -6  -431946.96 1648.94
  -4  -6  -428990.48  955.97
   4  -6   5 2561.25 1198.96
   4   6   5 2760.76  353.96
  -4  -6  -5 2854.80  590.38
  -4  -6  -5 2151.64  225.73
  -4   6  -5 2796.01  891.12
   4   6   6 8286.54  817.17
   4  -6   6 9528.60 1795.63
  -4   6  -610151.14 1237.29
  -4  -6  -6 8798.39  824.88
   4   6   732625.24 1983.83
   4  -6   727245.24 3111.58
  -4  -6  -729335.59 1805.34
  -4   6  -729004.80 2245.46
   4   6   8 7112.64  636.99
   4  -6   8 6842.93 1718.96
  -4   6  -8 6283.79 1170.57
  -4  -6  -8 6595.74  747.37
   4  -6   9 9395.56 1984.96
   4   6   913415.54 1241.42
  -4   6  -9 9736.16 1482.78
  -4  -6  -912737.27 1041.40
   4  -6  10 1161.53 1249.04
   4   6  10 2488.99  530.56
  -4   6 -10 1763.94  973.65
  -4  -6 -10 1318.63  621.76
   4  -6  11 5083.06 1936.07
   4   6  11 7083.38 1168.10
  -4   6 -11 5951.46 1373.30
  -4  -6 -11 7605.86  918.25
   4  -6  12 2390.77 1509.26
   4   6  12 3532.32  725.33
  -4   6 -12 1834.16 1124.46
  -4  -6 -12 1712.63  681.38
   4   6  13 1059.03  908.68
   4  -6  13 -253.56 1316.24
  -4   6 -13  938.37  601.47
  -4  -6 -13  857.82  603.79
   4  -6  1413043.36 2117.27
   4   6  1413617.94 1324.48
  -4   6 -1415229.60 1882.85
  -4  -6 -1414268.04 1224.00
   4   6  1526167.61 2096.38
   4  -6  1521483.08 2854.60
  -4  -6 -1524323.85 1867.22
  -4   6 -1522533.05 2573.05
   4   6  16 8084.07 1217.31
   4  -6  16 6496.35 1868.62
  -4  -6 -16 8239.97 1009.89
  -4   6 -16 7069.46 1506.67
   4  -6  17  281.16 1216.82
   4   6  17   80.05 1067.08
  -4  -6 -17  202.64  647.36
  -4   6 -17  841.70 1045.04
   4  -6  1813966.86 2103.99
  -4   6 -18 8421.49 1852.61
  -4  -6 -1812410.90 1267.59
   4  -6  19 1532.41 1195.70
  -4  -6 -19 -131.84  630.34
  -4   6 -19 -945.65 1003.61
  -4  -8  19  106.40  868.67
  -4   8  19 -187.24  814.11
  -4   8  18 -497.03  805.66
  -4  -8  18  497.15  844.70
  -4  -8  17  477.93  850.19
  -4   8  17 -144.08  803.81
  -4  -8  16 1569.50 1028.83
  -4   8  16 2300.55 1043.44
   4   8 -1531570.56 2613.15
  -4  -8  1529303.33 3027.02
  -4   8  1525104.20 2382.21
   4   8 -1413024.19 1193.22
  -4  -8  1412062.91 1412.88
  -4   8  1413039.09 1703.03
   4   8 -1313382.48 1229.92
  -4   8  13 9055.77 1661.44
  -4  -8  1311233.17 1397.52
   4   8 -12 3894.34  762.03
  -4   8  12 3635.48 1159.91
  -4  -8  12 2625.37  934.53
   4   8 -11  723.80  858.59
  -4   8  11  475.04 1003.79
  -4  -8  11  428.90  680.87
   4  -8 -10 3779.39  418.03
   4   8 -10 5636.27  831.21
  -4   8  10 4524.94 1194.49
  -4  -8  10 3585.19  830.12
   4  -8  -9 7608.70  570.98
   4   8  -9 8920.34  932.32
  -4   8   9 5440.78 1595.55
  -4  -8   9 7375.13  883.43
   4  -8  -8 5590.92  526.30
   4   8  -8 6263.54  793.69
  -4   8   8 5407.26 1404.09
  -4  -8   8 4374.70  689.91
   4   8  -7  264.29  473.72
  -4   8   7 -105.24  273.53
  -4  -8   7  493.88  389.28
   4  -8  -611653.73 1934.39
   4   8  -6 7709.30  834.37
  -4   8   6 9893.40  834.49
  -4  -8   6 9771.68  901.98
   4  -8  -5 8609.91 1302.93
   4   8  -5 7166.44  844.07
  -4   8   5 6712.27  660.16
  -4  -8   5 6439.39  693.31
   4   8  -4  495.76  572.35
   4  -8  -4 2007.30  872.81
  -4   8   4  899.00  605.95
  -4  -8   4 1529.16  408.33
   4  -8  -3 1353.78  779.51
  -4  -8   3  742.42  325.93
  -4  -8   3  181.55  251.17
  -4   8   3  865.00  676.48
   4  -8  -2  182.07  689.20
  -4   8   2  141.00  485.19
  -4  -8   2  501.82  210.67
  -4  -8   2  934.88  528.13
  -4  -8   2  439.98  224.47
   4  -8  -1 9194.82 1162.37
  -4  -8   111298.54  967.92
  -4   8   110457.28 1034.02
   4  -8   0 1567.33  706.62
  -4   8   0 1409.59  682.39
   4  -8   113210.38 1441.14
  -4  -8  -115318.80 1114.54
  -4   8  -115967.38 1387.90
   4  -8   2 -204.56  628.83
  -4   8  -2  641.02  693.09
  -4  -8  -2  688.77  485.26
   4  -8   3  737.47  680.20
  -4   8  -3  139.85  750.79
  -4  -8  -3  637.89  490.85
   4  -8   4 2871.70 1016.92
  -4   8  -4 4117.81 1008.20
  -4  -8  -4 3596.00  653.98
   4  -8   5 1241.67 1035.19
  -4  -8  -5 1364.46  554.56
  -4   8  -5 1833.65  904.47
   4  -8   6 9808.95 1689.57
   4   8   6 8053.90  316.08
  -4   8  -610339.56 1379.57
  -4  -8  -6 9922.85  905.40
   4  -8   7 2775.96 1421.27
   4   8   7 1894.84  374.71
  -4   8  -7 2156.18  611.94
  -4  -8  -7 1859.93  642.71
   4  -8   8 4629.33 1854.03
   4   8   8 4728.60  599.55
  -4  -8  -8 6494.80  777.42
  -4   8  -8 2736.42 1228.30
   4  -8   9 1062.86 1286.09
   4   8   9 -159.52  398.92
  -4   8  -9  265.89  870.22
  -4  -8  -9  -30.79  471.95
   4   8  10 5648.61  710.59
   4  -8  10 3810.18 1923.87
  -4  -8 -10 5939.73  791.24
  -4   8 -10 4250.04 1389.71
   4  -8  11 1474.11 1339.85
  -4   8 -11  209.92  969.28
  -4  -8 -11  -42.95  515.22
   4  -8  1210031.28 2096.24
  -4   8 -12 7875.46 1665.41
  -4  -8 -12 8924.57  970.02
   4  -8  13 7930.67 1142.41
  -4   8 -13 4973.61 1610.17
  -4  -8 -13 7107.14  976.53
   4  -8  14 8315.22 1919.34
  -4   8 -14 8625.79 1742.61
  -4  -8 -14 9143.30 1027.61
   4  -8  15 -565.52 1299.62
  -4   8 -15  988.23 1077.22
  -4  -8 -15  190.91  581.55
   4  -8  16 1147.62 1479.37
  -4   8 -16 1538.95 1216.29
  -4  -8 -16 1354.95  699.08
   4  -8  17 2610.60 1251.02
  -4   8 -17 -868.76 1054.19
  -4  -8 -17 -509.63  598.18
   4  -8  18 4690.19 1762.50
  -4   8 -18 2738.85 1554.21
  -4  -8 -18 5645.03  922.92
  -4  10  18 2146.90 1037.68
  -4 -10  18 1773.73 1139.74
  -4  10  17 -389.55  876.18
  -4 -10  17  709.86  868.09
   4  10 -16 5688.16 1023.23
  -4 -10  16 6049.73 1282.94
  -4  10  16 4782.13 1289.48
   4  10 -15 3175.57  830.43
  -4  10  15 3024.01 1073.25
  -4 -10  15  886.53 1000.31
   4  10 -14  511.75  689.46
  -4 -10  14   39.66  738.84
  -4  10  14   46.46  908.11
   4  10 -13 1507.00  805.45
  -4  10  13 1637.87 1065.75
  -4 -10  13 1358.38  829.35
   4  10 -1213614.10 1383.39
  -4  10  1218912.23 2628.25
  -4 -10  1215050.30 1843.34
   4  10 -11 8852.26 1146.86
  -4  10  11 6303.46 1434.11
  -4 -10  11 5807.01 1399.70
   4  10 -1065633.58 3567.40
   4 -10 -1059079.54 2764.19
  -4  10  1066636.58 4592.89
  -4 -10  1064930.64 3448.16
   4 -10  -9 3767.51  618.73
   4  10  -9 3677.90  886.36
  -4  10   9 4137.60 1409.51
  -4 -10   9 2512.64  755.55
   4  10  -881209.03 4402.54
   4 -10  -884146.05 3797.46
  -4 -10   893341.39 5175.39
  -4  10   894419.33 6138.31
   4  10  -774233.71 4052.93
   4 -10  -772345.83 7070.12
  -4  10   775540.04 4066.00
  -4 -10   772815.28 3971.45
   4 -10  -6 5627.66 2693.83
   4  10  -6 8923.69 1041.17
  -4  10   6 8317.68 1003.03
  -4 -10   6 7313.50  714.57
   4 -10  -5  713.58  909.79
   4  10  -5  297.10  633.41
  -4 -10   5   38.81  492.05
  -4  10   5 1341.90  703.55
   4 -10  -419534.00 1872.09
   4  10  -416801.37  987.95
  -4 -10   421195.54 1180.15
  -4  10   420901.88 1294.74
   4 -10  -317069.29 1763.52
  -4  10   318874.76 1268.08
  -4 -10   313831.45  810.53
   4 -10  -2 2168.14  868.96
  -4  10   2 1176.72  669.52
  -4 -10   2 2023.99  708.49
   4 -10  -1 1919.38  780.35
  -4  10   1  432.90  662.43
  -4 -10   1 1671.27  650.55
   4 -10   0 2215.66  814.02
  -4 -10   0 2764.39  710.55
  -4  10   0 2809.45  767.33
   4 -10   113310.30 1382.34
  -4 -10  -111711.17 1166.96
  -4  10  -112768.49 1322.38
   4 -10   217441.09 2058.12
  -4  10  -217775.60 1588.26
  -4 -10  -218964.07 1302.67
   4 -10   3   31.42  802.24
  -4 -10  -3 1326.65  355.34
  -4  10  -3  584.92  855.26
   4 -10   415391.74 2012.75
  -4  10  -415689.72 1645.80
  -4 -10  -414549.32 1156.53
   4 -10   516902.92 1950.57
  -4  10  -516660.75 1900.46
  -4 -10  -516888.11 1343.81
   4 -10   6  350.47 1020.49
  -4  10  -6  714.57  848.52
  -4 -10  -6 -185.86  526.49
   4 -10   7 2281.56 1419.13
  -4  10  -7 3039.73 1184.22
  -4 -10  -7 2611.99  727.30
   4 -10   8 1736.97 1547.71
  -4  10  -8 2876.73 1186.50
  -4 -10  -8 3154.11  717.65
   4 -10   910234.04 1396.12
  -4  10  -9 6985.11 1643.05
  -4 -10  -9 9977.15 1052.78
   4 -10  10 2431.88 1456.79
  -4 -10 -10   99.33  585.31
  -4  10 -10  304.73  577.10
   4 -10  11 1552.52 1675.56
  -4  10 -11 2111.86 1165.90
  -4 -10 -11 1180.36  671.67
   4 -10  12-3152.63 1485.37
  -4  10 -12 -397.45 1058.96
  -4 -10 -12 -134.65  596.74
   4 -10  13 2604.62 1839.54
  -4  10 -13 1662.54 1343.96
  -4 -10 -13 3673.26  800.38
   4 -10  1417717.30 2889.54
  -4  10 -1417637.03 2314.04
  -4 -10 -1420598.85 1527.97
   4 -10  15 2607.81 1918.01
  -4  10 -15 3282.58 1582.45
  -4 -10 -15 6369.71  937.28
   4 -10  16-1285.09  718.32
  -4 -10 -16 1101.40  571.39
  -4  10 -16 -753.61 1002.51
   4 -10  17 1037.71 1423.19
  -4 -10 -17  708.82  699.56
  -4  10 -17  881.35  717.17
   4  12 -16 2440.16 1057.99
  -4  12  16 4637.52 1203.41
  -4 -12  16 3714.20 1172.36
   4  12 -15  214.90 1092.65
  -4  12  15 -152.39  869.06
  -4 -12  15  492.37  826.59
   4  12 -14 1512.41  999.80
  -4  12  14 6341.56 1183.80
  -4 -12  14  889.70 1012.17
   4  12 -13  370.23  744.41
  -4 -12  13  297.75  787.12
  -4  12  13 1043.04 1333.06
   4  12 -1210001.64 1295.91
  -4  12  1210645.40 2290.87
   4  12 -11 2020.61  896.36
  -4  12  11 2356.27 1136.48
   4  12 -10 2256.57  914.24
  -4  12  10 3095.31 1247.91
   4  12  -913217.57 1430.49
   4 -12  -914695.39 1054.91
  -4  12   9 7075.18 1939.80
   4 -12  -8 1940.60  563.62
   4  12  -8  906.96  760.24
  -4  12   8  819.24 1238.77
   4 -12  -721120.56 3990.23
   4  12  -735498.67 2421.82
  -4  12   735769.82 2045.61
   4 -12  -617710.39 2642.13
   4  12  -615202.32 1530.36
  -4  12   614569.51 1611.83
   4 -12  -591417.66 8594.17
   4  12  -5113996.6 6771.00
  -4  12   5106143.6 5916.16
   4  12  -415130.84 1566.22
   4 -12  -416446.68 1996.61
  -4  12   419390.56 1474.81
   4 -12  -350356.79 3981.49
  -4  12   363806.23 3694.38
   4 -12  -229665.56 2319.25
  -4  12   226623.80 1922.35
  -4 -12   228396.51 2061.34
   4 -12  -1 2511.90 1026.57
  -4  12   1 1175.51  856.95
  -4 -12   1 4944.52  887.86
   4 -12   023330.74 1977.42
  -4  12   022534.98 1925.36
  -4 -12   023971.14 1742.19
   4 -12   1  384.96  760.19
  -4  12  -1 -568.91  764.31
  -4 -12  -1 1006.23  656.30
   4 -12   2 6761.77 1221.83
  -4  12  -2 7370.14 1201.89
  -4 -12  -2 8003.43 1023.29
   4 -12   3   92.42  781.07
  -4  12  -3  351.74  797.30
  -4 -12  -3  132.51  597.26
   4 -12   413907.66 1495.74
  -4  12  -412475.10 1606.74
  -4 -12  -412263.66 1242.19
   4 -12   5  116.70  984.10
  -4  12  -5 2426.50 1053.89
  -4 -12  -5 2457.43  748.97
   4 -12   622207.50 2936.50
  -4  12  -619939.13 2171.25
  -4 -12  -623881.18 1704.70
   4 -12   717705.01 2384.58
  -4  12  -721758.48 2398.41
  -4 -12  -720462.44 1645.08
   4 -12   8 3308.17 1491.88
  -4  12  -8 2432.53 1314.33
  -4 -12  -8 4203.33  842.20
   4 -12   9 4839.65 1767.14
  -4  12  -9 6852.96 1563.12
  -4 -12  -9 7372.71  998.12
   4 -12  10 1893.81 1499.67
  -4  12 -10 1358.60 1201.67
  -4 -12 -10 2190.02  760.93
   4 -12  1118867.27 3017.98
  -4  12 -1117807.65 2292.23
  -4 -12 -1123479.99 1773.81
   4 -12  12 2367.87 1397.02
  -4  12 -12-1208.35 1000.78
  -4 -12 -12 -274.61  591.05
   4 -12  13  194.27 1673.55
  -4  12 -13 1680.60  770.55
  -4 -12 -13 2676.84  776.56
   4 -12  14 2155.55 1496.03
  -4  12 -14  453.68 1100.11
  -4 -12 -14  300.83  617.13
   4 -12  15  530.12 1575.97
  -4  12 -15  536.13 1176.86
  -4 -12 -15  607.54  678.82
   4  14 -14 1974.84 1003.29
   4  14 -13 1132.19  938.73
   4  14 -12 2107.43  927.84
   4  14 -11 1856.87  858.18
  -4  14  11  387.43 1112.36
   4  14 -10 -645.28  751.41
   4  14 -10 -123.86  732.46
  -4  14  10 1733.06  915.71
   4  14  -9 -562.53  682.30
  -4  14   9 1184.35  923.00
   4  14  -8 6734.31 1228.83
   4 -14  -8 6308.31 1157.86
  -4  14   8 7337.75 1601.17
   4 -14  -7 4915.56  533.02
   4  14  -7 2484.81 1113.95
  -4  14   7 4042.66  865.18
   4 -14  -612228.64 2763.73
   4  14  -619276.75 1805.41
  -4  14   618540.12 1470.02
   4  14  -5 4573.60 1143.76
   4 -14  -5 4405.61 1655.23
  -4  14   5 7567.35  972.74
   4 -14  -4 5292.34 1485.09
  -4  14   4 5795.70 1011.50
   4 -14  -3 8265.68 1811.51
  -4 -14   318129.75 1711.22
  -4  14   315854.94 1523.46
   4 -14  -215472.70 1865.31
  -4 -14   218423.16 1738.81
  -4  14   218778.67 1724.99
   4 -14  -1 2954.67 1355.38
  -4 -14   1 1375.26  877.57
  -4  14   1 1979.97  878.91
   4 -14   0 9596.97 1999.22
  -4 -14   013110.95 1391.01
  -4  14   011259.17 1421.25
   4 -14   1 -295.21  790.33
  -4 -14  -1  870.13  712.66
  -4  14  -1 -104.78  797.52
   4 -14   2 1619.34 1151.85
  -4 -14  -2  620.69  750.19
  -4  14  -2 -175.73  869.44
   4 -14   314751.63 1647.89
  -4 -14  -319463.71 1707.20
  -4  14  -314745.99 1831.99
   4 -14   4  483.98  811.88
  -4 -14  -4 -428.85  694.47
  -4  14  -4  567.25  832.13
   4 -14   5 2438.72 1032.90
  -4  14  -5 3188.41 1131.62
  -4 -14  -5 3268.60  989.22
   4 -14   6 -866.04  819.80
  -4 -14  -6 -129.63  681.63
  -4  14  -6 -603.15  892.48
   4 -14   7  632.26  866.86
  -4 -14  -7   21.93  687.17
  -4  14  -7  385.89  927.33
   4 -14   8  734.61 1063.22
  -4 -14  -8  663.11  739.74
  -4  14  -8  655.09 1000.02
   4 -14   9 1993.09 1316.69
  -4  14  -9 2606.25 1173.88
  -4 -14  -9 2850.72  515.37
   4 -14  10 1114.80 1171.50
  -4  14 -10-1017.73  974.31
  -4 -14 -10  828.18  674.31
   4 -14  11 2515.30 1374.63
  -4  14 -11 -210.34 1134.32
  -4 -14 -11 2793.43  819.12
   4 -14  12  889.84 1243.25
  -4  14 -12 -682.86 1041.30
  -4 -14 -12 -787.07  680.29
   4 -14  13 -995.99 1183.72
  -4  14 -13  506.34  953.86
  -4 -14 -13    7.72  641.70
   4  16 -11 3933.97 1207.04
   4  16 -10 -666.46  900.55
   4  16  -9 5067.85 1228.71
   4  16  -8 1241.06  945.54
   4  16  -7 -674.74  824.09
   4 -16  -7  229.86  701.21
   4  16  -6 3469.85  918.01
  -4  16   6 -497.02  735.40
  -4 -16   5  970.75  560.46
  -4  16   5  420.60 1098.07
  -4 -16   4   35.68  473.86
  -4  16   4 -159.52  636.37
  -4 -16   3 2871.53  947.81
  -4  16   3 -232.69  793.99
  -4  16   2 -428.25  707.16
  -4 -16   2  579.47  734.52
  -4 -16   1 2324.11  856.12
  -4  16   1 -598.26  892.47
  -4 -16   0 1579.12  812.90
  -4  16   0  -93.65  847.73
   4 -16   1 -152.81  895.41
  -4 -16  -1 -634.88  773.81
  -4  16  -1 -309.43  820.80
   4 -16   2 8609.93 1446.58
  -4 -16  -210997.67 1369.79
  -4  16  -2 8867.14 1417.42
   4 -16   3  642.17  915.65
  -4  16  -3 2035.00  928.34
  -4 -16  -3  435.17  518.23
   4 -16   4 1175.54 1117.63
  -4 -16  -4  634.36  875.02
  -4  16  -4 -688.78  894.48
   4 -16   5  831.56  838.18
  -4 -16  -5  176.36  803.51
  -4  16  -5 -556.09  909.14
   4 -16   6  608.42 1322.82
  -4 -16  -6 1366.00  829.33
  -4  16  -6 -493.44  992.06
   4 -16   7  245.43  823.72
  -4 -16  -7  281.90  757.54
  -4  16  -7  -96.34  878.07
   4 -16   8 2566.57 1037.83
  -4 -16  -8 1940.49  881.45
  -4  16  -8 -352.91 1100.00
   4 -16   9 1707.55  955.50
  -4 -16  -9  230.47  788.72
  -4  16  -9  171.47  975.58
   4 -16  10 2846.20 1304.53
  -4 -16 -10 5062.27 1040.36
  -4 -18   4  499.97  959.90
  -4  18   4  256.90  843.79
  -4 -18   3 1304.72 1023.32
  -4  18   3 2282.70  998.71
  -4 -18   2 1185.58  906.71
  -4  18   2  193.02  844.55
  -4 -18   1 2029.52  894.95
  -4  18   1 -833.75  899.81
  -4 -18   0 1054.88  964.39
  -4  18   0 1668.97  993.14
  -4 -18  -1   60.65  875.90
  -4  18  -1 -323.33  876.22
  -4 -18  -2 -400.11  907.41
  -4  18  -2 -180.47  929.79
  -4 -18  -3  457.19 1029.67
  -4  18  -3 1986.05 1034.77
  -5   1  21 -994.27  863.58
  -5  -1  21  224.74  860.22
  -5   1  20  863.87  944.96
  -5  -1  20 1320.99  919.17
  -5   1  19 -460.06  735.04
  -5  -1  19  401.27  725.93
  -5   1  18 2682.96 1083.99
  -5  -1  18 2852.91 1028.79
  -5   1  17 -180.97  473.11
  -5  -1  17  101.52  753.45
  -5   1  1633768.31 2658.94
  -5  -1  1632420.97 2660.34
  -5   1  1595240.94 5533.53
  -5  -1  1591406.84 5377.49
  -5   1  14 5034.19 1331.03
  -5  -1  1410014.83 1351.96
  -5   1  1369556.64 4067.34
  -5  -1  1369601.87 4042.50
  -5   1  1228606.85 2307.71
  -5  -1  1227673.90 2152.39
  -5   1  11 3451.84 1131.20
  -5  -1  11 6414.89 1002.66
  -5  -1  10 1985.95  116.37
  -5  -1  10 2239.99  901.61
  -5   1  10 1046.06  901.01
  -5   1   9 2330.87  968.50
  -5  -1   9 2982.61  873.05
  -5  -1   9 1994.64  127.93
  -5   1   8  796.25  754.41
  -5  -1   8   93.86   98.78
  -5  -1   8  458.15  733.88
  -5  -1   8  252.96  134.12
  -5   1   7 2693.83 1080.94
  -5  -1   7 1454.45  217.24
  -5  -1   7 2891.09  848.52
  -5  -1   7 1686.90  150.04
  -5   1   611837.25 1665.85
  -5  -1   610883.09  539.54
  -5  -1   6 9949.28  392.50
  -5  -1   611600.82 1424.25
   5  -1  -532240.24  935.38
   5  -1  -541468.50 3904.80
  -5  -1   537762.06 2609.63
  -5  -1   532826.93 1161.15
  -5  -1   536488.97 1217.91
  -5   1   536625.35 1084.06
   5  -1  -4  710.19  205.12
   5  -1  -4  997.71 1135.21
  -5   1   4 1901.22  272.01
  -5  -1   4 1437.86  303.15
  -5  -1   4  223.56  522.36
   5  -1  -329723.67 1101.52
   5   1  -334598.41 2885.16
   5  -1  -333077.74 1729.98
  -5   1   333595.47 1159.69
  -5  -1   335894.63 1360.10
   5   1  -2 5085.78 1208.16
   5  -1  -2 9095.10 1244.16
  -5   1   2 8312.52  545.87
  -5  -1   2 7741.17  527.33
   5  -1  -1149018.8 7906.59
   5   1  -1154445.7 7933.14
  -5   1   1149644.9 6896.69
  -5  -1   1150470.0 6601.54
   5  -1   0 3847.36  934.57
   5   1   0 2738.53  804.45
  -5   1   0 3429.34  776.03
  -5  -1   0 5639.79  556.57
   5  -1   1128389.3 6579.51
   5   1   1131672.0 6355.78
  -5   1  -1127276.0 5752.32
  -5  -1  -1132570.8 5912.21
   5  -1   213306.53 1303.82
   5   1   212480.02 1140.06
  -5   1  -212669.93  992.08
  -5  -1  -213468.92  993.26
   5   1   354860.78 3205.06
   5  -1   352757.72 2933.74
  -5   1  -354359.20 2523.58
  -5  -1  -352620.26 2435.97
   5  -1   4   35.75  810.55
   5   1   4  278.84  692.57
  -5   1  -4  656.05  525.33
  -5  -1  -4  514.79  506.54
   5  -1   5288529.718050.80
   5   1   5280737.517019.47
  -5   1  -5283728.416191.23
  -5  -1  -5281045.715984.70
   5  -1   6  224.19  993.74
   5   1   6 -841.09  838.52
  -5   1  -6  -37.09  500.91
  -5  -1  -6  297.79  461.46
   5   1   798259.35 5800.68
   5  -1   793115.59 5996.75
  -5   1  -793068.55 4595.56
  -5  -1  -791418.41 4406.33
   5  -1   8 6028.82 1734.55
   5   1   812241.63 1559.28
  -5   1  -8 9448.10 1024.84
  -5  -1  -810948.32 1061.00
   5  -1   9 3548.53 1314.67
   5   1   9 4818.94 1114.82
  -5   1  -9 4518.30  799.19
  -5  -1  -9 3432.97  754.27
   5  -1  10 5075.56 1615.31
   5   1  10 6313.14 1425.37
  -5   1 -10 8698.94 1082.96
  -5  -1 -10 8974.41 1022.96
   5   1  11 4671.38 1175.39
   5  -1  11 1946.98 1335.37
  -5   1 -11 3737.15  876.27
  -5  -1 -11 3439.05  806.53
   5  -1  12  874.43 1135.62
   5   1  12  724.79 1380.42
  -5   1 -12  924.51  701.39
  -5  -1 -12  298.00  684.60
   5  -1  1311670.49 1835.92
   5   1  13 8063.10 1672.58
  -5   1 -1310724.40 1308.00
  -5  -1 -1313795.43 1298.88
   5  -1  14 -157.26 1105.22
   5   1  14  793.20 1051.18
  -5   1 -14  586.54  789.65
  -5  -1 -14 1537.67  780.74
   5  -1  1536035.31 3233.37
   5   1  1538576.93 3036.26
  -5   1 -1540398.76 2820.22
  -5  -1 -1537153.08 2574.81
   5  -1  16 -148.35 1129.15
   5   1  16  529.25 1039.18
  -5   1 -16  870.41  865.22
  -5  -1 -16  759.80  809.46
   5  -1  17 6555.54 1817.47
   5   1  17 9047.56 1753.13
  -5   1 -1711475.56 1425.65
  -5  -1 -1711049.09 1340.97
   5  -1  18  806.39 1085.07
   5   1  18  240.63 1023.37
  -5   1 -18  -56.31  835.35
  -5  -1 -18  363.91  777.71
   5  -1  1910061.69 1919.48
   5   1  19 7451.07 1796.01
  -5   1 -1911372.74 1517.11
  -5  -1 -1910380.02 1475.48
   5  -1  20  680.80 1249.25
   5   1  20 2012.24 1202.99
  -5   1 -20   41.17  986.55
  -5  -1 -20  196.13  926.33
  -5   3  21 3171.32 1259.62
  -5  -3  21 2132.02  688.99
  -5  -3  20  143.17  818.51
  -5   3  20 -106.30  838.29
  -5   3  19 -240.58  934.45
  -5  -3  19  705.39  850.13
  -5   3  18 1340.55 1015.13
  -5  -3  18 1833.89  958.19
  -5   3  17 3159.96 1071.32
  -5  -3  17 2566.26  995.17
  -5   3  16 6506.49 1383.06
  -5  -3  16 4937.53 1271.36
  -5   3  1511431.50 1521.92
  -5  -3  1511598.99 1370.92
  -5  -3  14 -367.86  718.55
  -5   3  14  428.79  790.60
  -5   3  13 6335.38 1480.01
  -5  -3  1311952.06 1265.32
   5   3 -12 1750.75  351.01
  -5  -3  12 1394.88  830.98
  -5   3  12 1500.31  627.04
   5   3 -1110541.53  615.31
  -5   3  1112880.74 1604.23
  -5  -3  11 9207.23 1156.95
  -5  -3  10 3098.29  852.66
  -5   3  10 3124.63 1103.71
  -5  -3   951348.47 2807.23
  -5  -3   953495.99 1906.84
  -5   3   959378.73 3684.46
  -5   3   819293.15 2157.59
  -5  -3   819812.68  891.31
  -5  -3   822955.76 1687.86
  -5   3   746729.21 3245.36
  -5  -3   745911.84 2460.43
  -5  -3   740197.65 1629.63
   5  -3  -643100.34 4410.28
  -5  -3   640221.75 1721.84
  -5  -3   639900.26 2481.99
   5  -3  -597961.48 3421.24
   5  -3  -599092.64 6336.94
  -5   3   5102819.5 3752.26
  -5  -3   5103014.2 4252.11
  -5  -3   5103027.3 5018.72
   5  -3  -479185.76 5365.39
  -5  -3   480959.56 3670.12
  -5   3   477671.88 3631.29
  -5  -3   480370.05 4400.36
   5  -3  -329901.74 1162.46
   5  -3  -333526.89 2431.13
  -5  -3   328618.74 1373.45
  -5  -3   330266.41 1802.35
  -5   3   331229.19 1484.90
   5   3  -2 -119.32 1187.04
   5  -3  -2  180.16  753.66
  -5   3   2 -168.43  477.63
  -5  -3   2  432.09  468.16
   5   3  -1 2473.78 1034.09
   5  -3  -1 2867.80  878.09
  -5   3   1 2013.08  659.24
  -5  -3   1 1473.79  435.93
   5  -3   0   50.61  719.23
   5   3   0  748.69  510.57
  -5   3   0  523.45  444.28
  -5  -3   0  201.02  399.36
   5  -3   158622.98 3288.28
   5   3   161285.69 2992.46
  -5   3  -159550.97 2696.30
  -5  -3  -156104.80 2490.64
   5  -3   2   75.21  658.59
   5   3   2  106.47  506.34
  -5   3  -2  287.54  518.82
  -5  -3  -2   40.83  423.91
   5   3   3 2708.07  522.43
   5  -3   3 3342.03  964.46
  -5   3  -3 2574.12  707.96
  -5  -3  -3 2891.37  585.98
   5   3   4  242.81  427.39
   5  -3   4  447.06  875.09
  -5   3  -4   62.44  600.98
  -5  -3  -4  457.15  473.80
   5  -3   5477998.234431.94
   5   3   5511048.934794.27
  -5   3  -5486849.833201.08
  -5  -3  -5479379.131739.17
   5   3   636833.76 3200.17
   5  -3   639379.74 3581.75
  -5   3  -640011.50 2593.38
  -5  -3  -644726.92 2463.13
   5  -3   773692.94 5063.85
   5   3   776757.75 4993.97
  -5   3  -768870.67 3637.72
  -5  -3  -771718.40 3460.45
   5  -3   8 4951.08 1801.75
   5   3   8 4633.32 1581.84
  -5   3  -8 5835.64 1010.43
  -5  -3  -8 9112.50  884.10
   5  -3   9 8170.72 1905.89
   5   3   911810.40 1351.01
  -5   3  -910562.21 1167.40
  -5  -3  -910478.99  675.22
   5   3  10 1897.03  901.51
   5  -3  10 2004.91 1317.66
  -5   3 -10 1219.15  776.55
  -5  -3 -10 1462.93  654.75
   5  -3  11  624.62 1019.64
   5   3  11  213.32  719.49
  -5   3 -11 -264.49  370.27
  -5  -3 -11  400.14  536.25
   5   3  12 -430.95  812.85
   5  -3  12 -985.64 1170.54
  -5   3 -12  104.55  737.67
  -5  -3 -12 -347.96  602.34
   5  -3  1318238.66 2597.60
   5   3  1323440.07 1970.60
  -5   3 -1320322.37 1808.88
  -5  -3 -1320744.42 1629.86
   5  -3  14 1270.29 1403.39
   5   3  14 1041.12  947.72
  -5   3 -14 1095.72  922.71
  -5  -3 -14 1887.24  756.87
   5   3  1525620.90 2218.40
   5  -3  1520433.97 2612.81
  -5   3 -1526190.38 2213.35
  -5  -3 -1523614.60 1813.43
   5  -3  16  792.93 1602.26
   5   3  16 3944.79 1292.99
  -5   3 -16 5228.92 1224.41
   5  -3  1714062.34 2033.99
   5   3  1714062.03 1755.11
  -5   3 -17 7253.35 1560.39
  -5  -3 -1713385.79 1396.90
   5  -3  18  652.32 1284.65
   5   3  18  -46.19 1065.95
  -5   3 -18 2522.56 1024.96
  -5  -3 -18  494.42  827.34
   5   3  19 8474.59 1458.51
   5  -3  19 4713.84 1740.13
  -5   3 -19 2661.42 1387.59
  -5  -3 -19 5666.11 1150.19
  -5   5  20 -550.98 1027.76
  -5  -5  20 -882.04  959.79
  -5   5  19 3290.92 1179.62
  -5  -5  19 4216.50 1197.41
  -5   5  18  561.63  882.83
  -5  -5  18  135.71  874.36
  -5   5  17 3274.81 1113.43
  -5  -5  17 2838.85 1060.74
  -5   5  16 2777.98 1148.90
  -5  -5  16 2672.39 1009.19
  -5   5  15 6906.01 1401.45
  -5  -5  15 9004.66 1254.04
  -5   5  14  239.32  964.00
  -5  -5  14  828.86  781.47
   5   5 -13 4197.42  668.06
  -5   5  13 4142.86 1271.14
  -5  -5  13 2567.91  950.85
   5   5 -12 1404.70  367.09
  -5   5  12  323.95 1124.32
  -5  -5  12   49.21  729.07
   5   5 -11 1594.02  391.17
  -5   5  11 2926.65 1154.41
  -5  -5  11 2858.07  800.87
   5   5 -10 1048.56  507.64
  -5   5  10  909.87  987.49
  -5  -5  10  867.75  692.45
   5   5  -9 6012.16  721.92
  -5   5   9 7358.36 1411.07
  -5  -5   9 6006.43  868.90
   5   5  -810971.89  735.99
  -5   5   812792.14 1795.23
  -5  -5   810782.61 1000.03
   5  -5  -715021.80 2743.10
  -5  -5   718153.07  874.53
  -5  -5   718204.20 1152.26
   5  -5  -626360.06 3096.42
  -5   5   622511.80  875.91
  -5  -5   629905.66 1623.46
  -5  -5   628206.86 1236.29
   5  -5  -569476.88 4433.56
   5  -5  -557059.84 2150.23
  -5  -5   561382.52 2488.82
  -5  -5   563317.94 3072.41
  -5   5   565531.00 2615.36
   5  -5  -4  811.78  827.11
  -5   5   4  184.41  420.46
  -5  -5   4  500.24  533.93
  -5  -5   4  170.55  477.52
   5  -5  -330092.37 2217.95
  -5   5   329001.25 1612.93
  -5  -5   327616.74 1566.34
  -5  -5   324112.08 1197.32
   5  -5  -2 1087.62  933.24
  -5   5   2 3340.90  592.00
  -5  -5   2 2142.35  649.50
  -5  -5   2 2927.56  530.86
   5  -5  -158063.19 3349.64
  -5  -5   154811.83 2563.86
  -5   5   160288.24 2805.22
  -5  -5   155070.93 2476.88
   5  -5   0 6585.94 1151.43
  -5   5   0 9317.28  953.50
  -5  -5   0 5727.27  549.88
  -5  -5   0 9422.26  763.09
   5   5   112136.89  914.91
   5  -5   1 9722.70 1201.41
  -5   5  -1 9807.93 1047.02
  -5  -5  -1 9353.58  810.58
  -5  -5  -1 9785.47  838.06
   5  -5   2 5393.02 1037.03
   5   5   2 6234.03  625.28
  -5   5  -2 4791.93  895.43
  -5  -5  -2 4923.26  519.74
  -5  -5  -2 5960.93  740.82
   5  -5   318474.60 1597.30
   5   5   320773.24 1010.65
  -5  -5  -317896.62  889.85
  -5   5  -320320.05 1478.59
  -5  -5  -320642.19 1192.35
   5  -5   432651.74 2568.85
   5   5   426365.41 1455.62
  -5   5  -430016.06 2106.35
  -5  -5  -435949.73 1976.06
   5   5   561764.45 2836.34
   5  -5   560493.01 3890.04
  -5   5  -564048.03 3395.86
  -5  -5  -558895.28 2793.05
   5  -5   6  -84.63  958.05
   5   5   6  158.70  348.31
  -5   5  -6 -360.12  635.04
  -5  -5  -6 -401.42  443.41
   5   5   7174253.1 8918.45
   5  -5   7156353.3 8724.12
  -5   5  -7166273.0 9399.55
  -5  -5  -7158047.8 8149.12
   5  -5   823175.46 3074.51
   5   5   823916.05 2334.28
  -5   5  -826696.67 2202.71
  -5  -5  -829930.82 1865.12
   5  -5   9 3527.52 1920.71
   5   5   9 6769.77 1263.37
  -5   5  -9 7570.33 1190.41
  -5  -5  -9 7402.97  885.72
   5  -5  10 3866.82 1809.98
   5   5  10 6114.42  921.65
  -5   5 -10 2638.69 1066.10
  -5  -5 -10 3619.60  799.73
   5   5  11 4952.56  906.86
   5  -5  11 5640.71 1016.52
  -5   5 -11 2964.45 1120.53
  -5  -5 -11 2263.19  783.11
   5  -5  12  594.50 1391.08
   5   5  12 2172.49 1046.38
  -5   5 -12  503.61  912.36
  -5  -5 -12  688.07  655.44
   5   5  13  314.86  753.03
   5  -5  13  555.25 1273.91
  -5   5 -13  545.68  941.53
  -5  -5 -13 1488.18  664.00
   5  -5  14  447.08 1387.14
   5   5  14 -110.38  750.16
  -5   5 -14 1164.75  963.77
  -5  -5 -14  942.08  626.55
   5  -5  15 3537.80 1699.26
   5   5  15 3832.92 1014.59
  -5   5 -15 2654.53 1164.90
  -5  -5 -15 2684.90  848.82
   5  -5  16  251.53 1149.57
   5   5  16  214.70  750.99
  -5   5 -16-1668.13  847.22
  -5  -5 -16  554.37  620.31
   5   5  17 3216.80 1149.03
   5  -5  17 3960.69 1715.91
  -5   5 -17 3823.22 1271.45
  -5  -5 -17 4714.37  939.78
   5  -5  18 1530.44 1484.08
  -5   5 -18  463.83 1184.55
  -5  -5 -18 2368.12  861.26
   5  -5  19  799.64 1242.58
  -5   5 -19 -497.32  965.68
  -5  -5 -19  -70.70  701.79
  -5   7  19  139.97  908.64
  -5  -7  19  240.69  940.80
  -5   7  18 -762.12  895.57
  -5  -7  18  -95.36  908.32
  -5   7  1719796.61 1984.36
  -5  -7  1720011.87 1983.72
  -5   7  16 3381.99 1188.71
  -5  -7  16 3382.11 1098.90
  -5   7  15 8175.91 1415.48
  -5  -7  15 4919.56 1183.50
   5   7 -1450555.83 2726.55
  -5   7  1450048.13 4007.87
  -5  -7  1448235.71 3360.85
   5   7 -1320728.33 1285.91
  -5   7  1319994.72 1477.39
  -5  -7  1321516.33 1702.34
   5   7 -12 1107.95  530.13
  -5   7  12 1783.66 1202.33
  -5  -7  12  666.12  731.87
   5   7 -11 6429.94  692.91
  -5   7  11 6715.01 1493.18
  -5  -7  11 6386.21  963.98
   5   7 -10 7386.81  705.20
  -5   7  10 2492.43 1592.63
  -5  -7  10 6826.27  877.24
   5  -7  -915858.78  638.56
   5   7  -916576.48 1072.95
  -5   7   917894.12 2190.92
  -5  -7   916305.60 1150.62
   5   7  -8 7457.90  747.03
   5  -7  -8 6457.22  418.40
  -5   7   8 4596.76 1574.76
  -5  -7   8 6441.15  716.70
   5  -7  -719259.12 2997.83
   5   7  -715769.61 1080.28
  -5   7   717080.65  862.57
  -5  -7   717472.54 1239.32
   5  -7  -6  500.67 1072.27
  -5   7   6  536.80  416.46
  -5  -7   6  464.15  364.48
  -5  -7   6  523.72  251.86
   5  -7  -518627.91 1913.02
  -5   7   516824.29 1072.50
  -5  -7   517734.61 1054.87
  -5  -7   518822.04 1142.03
   5  -7  -4 1171.04  984.51
  -5   7   4 1783.84  586.36
  -5  -7   4 1242.91  517.37
  -5  -7   4 1309.91  465.68
   5  -7  -3 3957.89 1101.50
  -5   7   3 4292.24  813.96
  -5  -7   3 4534.86  512.23
  -5  -7   3 6024.55  638.48
   5  -7  -2 9253.92 1365.11
  -5   7   212912.87 1282.84
  -5  -7   212336.85  633.20
  -5  -7   213832.46  969.40
   5  -7  -1 5033.35 1017.32
  -5   7   1 4851.24  778.99
  -5  -7   1 6627.90  658.27
  -5  -7   1 4955.84  324.31
  -5  -7   1 4869.32  301.16
   5  -7   018566.90 1689.61
  -5  -7   021983.04 1398.13
  -5   7   018837.91 1471.81
   5  -7   1 -113.71  656.23
  -5   7  -1  -61.04  592.00
  -5  -7  -1  443.73  442.82
  -5  -7  -1  287.39   92.38
  -5  -7  -1   52.67   76.61
   5  -7   221115.95 1868.88
  -5   7  -222659.87 1799.42
  -5  -7  -225613.29 1179.66
   5  -7   3  929.52  734.26
  -5   7  -3 1286.13  761.49
  -5  -7  -3 1380.88  533.30
  -5  -7  -3  955.33  109.17
   5  -7   423971.02 2134.03
  -5   7  -422270.80 1887.47
  -5  -7  -424379.09 1574.67
   5  -7   514580.09 1694.56
  -5   7  -514651.37 1475.00
  -5  -7  -512442.02 1015.84
   5  -7   616301.21 2269.28
  -5   7  -617091.55 1811.53
  -5  -7  -620540.44 1398.96
   5  -7   720981.94 2501.91
   5   7   720370.10 1093.00
  -5   7  -724671.48 2003.36
  -5  -7  -723174.02 1416.22
   5  -7   8  327.27 1231.86
   5   7   8   30.18  497.77
  -5   7  -8  205.05  470.22
  -5  -7  -8  117.52  491.45
   5  -7   9 5651.35 2037.21
   5   7   9 4431.03 1038.74
  -5   7  -9 6245.63 1286.78
  -5  -7  -9 6228.63  794.59
   5  -7  10 2279.76 1488.28
   5   7  10  401.61  691.79
  -5   7 -10 1043.76  911.77
  -5  -7 -10 -387.66  537.73
   5  -7  11 1429.19 1643.57
   5   7  11 1749.77  869.54
  -5   7 -11  -40.78 1033.28
  -5  -7 -11 1318.91  645.62
   5  -7  12  954.36 1326.21
  -5   7 -12  465.46  915.98
  -5  -7 -12 -243.85  536.56
   5  -7  1313716.90 2441.36
  -5  -7 -1314172.28 1204.51
  -5   7 -1312170.10 1897.65
   5  -7  14 4107.50 1170.60
  -5   7 -14 5277.18 1593.22
  -5  -7 -14 8589.72 1012.04
   5  -7  15 1494.78 1518.00
  -5   7 -15  849.20 1244.44
  -5  -7 -15 2899.86  794.08
   5  -7  16 4467.82 1711.85
  -5   7 -16 3793.84 1405.77
  -5  -7 -16 3534.13  910.16
   5  -7  17 9000.83 2340.80
  -5   7 -1714817.33 2084.12
  -5  -7 -1714018.39 1371.31
   5  -7  18-1101.37 1251.75
  -5   7 -18  106.60 1043.47
  -5  -7 -18  449.21  676.63
  -5   9  18  405.08  936.77
  -5  -9  18    5.51  906.64
  -5   9  1716257.09 1932.41
  -5  -9  1717207.93 2371.36
  -5   9  16 1991.24 1065.54
  -5  -9  16  390.17  951.72
  -5   9  15 -667.77  966.99
  -5  -9  15  537.59  760.85
   5   9 -14 3468.44 1058.38
  -5   9  14 5431.46 1377.83
  -5  -9  14 2140.05 1047.41
   5   9 -13 7529.48  910.38
  -5   9  13 7910.13 1685.51
  -5  -9  13 5827.13 1103.48
   5   9 -12 1969.08  638.60
  -5   9  12  -50.73 1195.27
  -5  -9  12  849.23  757.70
   5   9 -11  756.43  555.12
  -5   9  11 -229.72 1019.26
  -5  -9  11  102.11  632.97
   5   9 -10 4543.50  759.02
  -5   9  10 5688.75 1521.79
  -5  -9  10 3447.64  841.66
   5   9  -9   52.78  564.30
  -5   9   9 -286.42 1128.52
  -5  -9   9  797.36  722.14
   5  -9  -8  162.16  270.85
   5   9  -8  628.36  561.41
  -5   9   8  389.70  652.65
  -5  -9   8  -40.16  640.22
   5   9  -726059.22 1584.66
   5  -9  -725692.55 3115.02
  -5   9   720747.87 1290.99
  -5  -9   726476.08 1627.55
   5  -9  -6 -394.42 1064.88
  -5   9   6  -52.10  516.60
  -5  -9   6  251.78  477.94
  -5  -9   6  147.15  315.53
   5  -9  -5  825.60  998.20
  -5  -9   5  614.75  446.05
  -5  -9   5  590.49  584.02
  -5   9   5  419.91  423.73
   5  -9  -438185.41 3115.26
  -5   9   436733.40 2043.45
  -5  -9   440191.30 1929.26
  -5  -9   439877.54 2235.55
   5  -9  -3 3264.02 1085.58
  -5   9   3 3167.99  861.36
  -5  -9   3 3175.45  382.86
  -5  -9   3 3664.04  684.00
   5  -9  -211175.79 1418.58
  -5   9   210245.03 1049.39
  -5  -9   212099.16 1044.58
   5  -9  -1  812.11  785.31
  -5   9   1  110.96  611.64
  -5  -9   1 1427.02  564.36
   5  -9   027407.09 2211.66
  -5   9   031991.93 2169.09
  -5  -9   032195.85 1955.35
   5  -9   1 8310.90 1161.47
  -5   9  -1 7822.69 1084.94
  -5  -9  -1 7652.06  867.51
   5  -9   2 4981.76 1159.82
  -5   9  -2 5392.60 1093.27
  -5  -9  -2 8197.98  870.98
   5  -9   3 3331.37 1013.08
  -5   9  -3 5310.34 1076.74
  -5  -9  -3 4942.81  753.22
   5  -9   410354.88 1468.20
  -5  -9  -412438.29 1087.71
  -5   9  -412072.44 1513.59
   5  -9   5  801.44  912.82
  -5   9  -5   65.95  901.73
  -5  -9  -5  708.06  567.60
   5  -9   6  721.08  998.56
  -5   9  -6 -811.56  879.35
  -5  -9  -6 -203.09  525.08
   5  -9   7  829.43 1132.92
  -5   9  -7  432.60  962.86
  -5  -9  -7   59.27  535.72
   5  -9   8 3773.56 1666.86
  -5  -9  -8 4233.13  817.54
  -5   9  -8 4538.12 1418.83
   5  -9   9 1949.20 1579.22
  -5   9  -9 2679.37 1246.99
  -5  -9  -9 2390.79  427.96
   5  -9  1019506.63 2890.91
  -5   9 -1017907.15 2232.35
  -5  -9 -1016534.27 1441.91
   5  -9  1112415.33 2580.31
  -5   9 -1113483.98 1957.16
  -5  -9 -1114476.78 1236.79
   5  -9  1210186.62 2381.34
  -5   9 -12 8878.07 1830.57
  -5  -9 -12 8985.97 1120.70
   5  -9  1319473.37 3025.39
  -5   9 -1319142.59 2443.07
  -5  -9 -1322246.26 1576.30
   5  -9  14 2831.47 1776.95
  -5   9 -14 1033.06 1369.77
  -5  -9 -14 2854.67  481.95
   5  -9  15  813.38 1828.91
  -5   9 -15 2320.43  854.52
  -5  -9 -15 5182.40  831.98
   5  -9  16 2354.31 1624.09
  -5  -9 -16 1338.14  768.44
  -5   9 -16 1087.83 1287.85
   5  -9  17 3770.80 1809.42
  -5   9 -17  709.07 1479.37
  -5  -9 -17 3299.36  858.81
  -5  11  17  521.33  962.43
  -5 -11  17 -806.06  891.08
  -5  11  16  978.70 1068.87
  -5 -11  16  813.76  918.48
  -5  11  15 2275.31 1239.78
  -5 -11  15 1725.90  945.45
   5  11 -14 -216.61  567.57
  -5  11  14-1431.38  950.84
  -5 -11  14 1057.47  701.17
   5  11 -13 -204.80  586.89
  -5  11  13  424.14 1128.78
  -5 -11  13  867.45  721.94
   5  11 -12  625.57  658.50
  -5  11  12  821.05 1119.19
  -5 -11  12  202.74  672.16
   5  11 -11 7591.41 1018.13
  -5  11  11 6519.17 1648.00
  -5 -11  11 8869.92 1076.63
   5  11 -10  735.70  719.65
  -5  11  10  742.41 1188.14
   5  11  -9  670.09  686.97
  -5  11   9 -500.05 1216.95
   5  11  -823828.80 1726.29
   5 -11  -818991.76 1129.23
  -5  11   813806.18 1579.91
   5 -11  -735398.65 4054.49
   5  11  -737426.78 2388.23
  -5  11   739189.85 2053.04
   5 -11  -657363.67 5434.98
  -5  11   675972.89 4063.13
   5 -11  -5 2664.80 1860.77
  -5  11   5 3758.64 1022.04
  -5 -11   5 3898.69  908.10
   5 -11  -4111396.9 8222.09
  -5  11   4130818.7 7478.52
  -5 -11   4130436.9 7620.88
   5 -11  -3  806.81  978.25
  -5  11   3  446.49  608.21
  -5 -11   3  711.85  654.51
   5 -11  -215669.82 1931.90
  -5  11   219591.20 1620.43
  -5 -11   220932.82 1615.07
   5 -11  -119280.17 1857.67
  -5  11   119072.89 1510.60
  -5 -11   115717.76 1396.81
   5 -11   0  906.12 1192.47
  -5  11   0 -177.59  686.81
  -5 -11   0 -778.67  594.52
   5 -11   1 2272.11 1061.49
  -5 -11  -1 4274.26  787.35
  -5  11  -1 4064.87  991.55
   5 -11   2 1721.52  931.07
  -5  11  -2 2308.49  953.25
  -5 -11  -2 1083.78  717.27
   5 -11   3  442.83  856.50
  -5  11  -3  844.57  907.36
  -5 -11  -3  583.07  609.28
   5 -11   4 1494.38 1007.42
  -5  11  -4 1912.54 1090.39
   5 -11   5 1003.87  882.24
  -5  11  -5    5.91  978.67
  -5 -11  -5  775.48  622.68
   5 -11   6   18.82  896.92
  -5  11  -6 -486.00  950.75
  -5 -11  -6  234.97  351.00
   5 -11   7 -486.62 1010.68
  -5  11  -7 1195.60  953.07
  -5 -11  -7 -811.05  596.62
   5 -11   8 7075.59 1662.70
  -5  11  -8 5264.73 1555.44
  -5 -11  -8 5816.21  956.84
   5 -11   925973.36 2839.53
  -5  11  -924733.85 2577.43
  -5 -11  -924594.67 1743.61
   5 -11  10 4598.75 1769.11
  -5  11 -10 6424.79 1572.14
  -5 -11 -10 7301.91  963.71
   5 -11  11 3227.45 1663.97
  -5  11 -11 4820.81 1338.12
  -5 -11 -11 2977.21  816.34
   5 -11  12 1093.40 1477.92
  -5  11 -12  331.06 1188.87
  -5 -11 -12 1537.87  683.99
   5 -11  13 -648.44 1300.94
  -5 -11 -13  247.39  582.28
  -5  11 -13 -173.80  969.30
   5 -11  14 6376.22 2173.08
  -5  11 -14 3586.33 1675.39
  -5 -11 -14 7396.18 1042.38
   5 -11  15 -338.77 1381.31
  -5  11 -15 -224.08 1040.08
  -5 -11 -15   78.17  638.37
  -5  13  15  464.19 1114.04
   5  13 -14 1205.10 1044.30
  -5  13  14  164.45 1127.35
   5  13 -13  761.75  759.56
  -5  13  13 1268.00 1263.66
   5  13 -12  169.30  766.13
  -5  13  12 1282.25 1148.67
   5  13 -11 1100.07  815.70
  -5  13  11 -317.43 1085.85
   5  13 -10  321.17  775.41
  -5  13  10-2451.14 1511.69
   5  13  -9  949.03  817.84
  -5  13   9 2328.60 1331.73
   5  13  -8 5222.81 1125.91
  -5  13   8 5806.96 1685.68
   5 -13  -7   20.14 2450.67
   5  13  -7  376.44  750.19
   5 -13  -621649.46 3564.15
  -5  13   631403.95 2019.15
  -5 -13   624852.93 1656.70
   5 -13  -520773.55 2732.12
  -5 -13   524416.30 2015.45
  -5  13   522754.01 2082.38
   5 -13  -4   11.37 1203.45
  -5  13   4 1510.82  755.58
  -5 -13   4 2182.21  878.69
   5 -13  -3  408.75 1312.75
  -5 -13   3 3173.42  925.66
  -5  13   3 3936.43  845.96
   5 -13  -2 2300.59 1043.27
  -5  13   2  934.99 1072.93
  -5 -13   2 1644.97  859.99
   5 -13  -1  916.77  956.97
  -5 -13   1  574.75  759.11
  -5  13   1 1007.77  815.22
   5 -13   0 1438.35 1099.91
  -5  13   0 4283.41 1345.75
  -5 -13   0 1798.45  906.20
   5 -13   111371.26 1694.03
  -5  13  -115531.82 1612.06
  -5 -13  -114637.92 1360.58
   5 -13   211613.49 1721.02
  -5  13  -212557.76 1655.52
  -5 -13  -215881.94 1474.44
   5 -13   3 3470.63 1096.55
  -5  13  -3 2684.40 1131.54
  -5 -13  -3 4872.99  902.75
   5 -13   4  479.60 1024.06
  -5  13  -4 2161.26 1012.43
  -5 -13  -4 2054.44  767.53
   5 -13   5  496.36 1325.13
  -5  13  -5 1479.52 1034.20
  -5 -13  -5 1282.56  723.46
   5 -13   6   63.62  937.73
  -5  13  -6  141.55  597.81
  -5 -13  -6 1961.13  698.30
   5 -13   7 5149.17 1315.36
  -5  13  -7 4333.71 1414.09
  -5 -13  -7 6784.78  955.58
   5 -13   8 -445.29 1044.23
  -5  13  -8 2142.29 1063.70
  -5 -13  -8  538.37  661.77
   5 -13   9 4397.51 1511.93
  -5  13  -9 5904.22 1397.57
  -5 -13  -9 4736.69  935.57
   5 -13  10 5286.43 1509.61
  -5  13 -10 1523.90 1368.10
  -5 -13 -10 3900.42  978.61
   5 -13  11 1757.24 1333.85
  -5  13 -11  108.83 1157.94
  -5 -13 -11 1416.18  721.20
   5 -13  12 -876.61 1324.01
  -5  13 -12  445.18 1106.12
  -5 -13 -12  971.50  716.26
   5 -13  13-1206.18 1156.08
  -5  13 -13   77.87 1073.89
  -5 -13 -13   45.10  643.39
   5  15 -12 3542.96 1134.53
   5  15 -11 3607.80 1082.70
   5  15 -10  938.92  904.64
   5  15  -9 4133.81 1100.99
  -5  15   9 2951.42 2189.56
   5  15  -8 6988.04 1295.55
  -5  15   8 5159.97 2497.76
  -5 -15   7 1783.19  607.40
   5 -15  -6-1572.77 2281.27
  -5 -15   6 -614.75  926.14
   5 -15  -5 -290.92 1743.94
  -5  15   5  651.67  640.51
  -5 -15   5 -293.33  863.41
   5 -15  -4   64.13 1455.95
  -5  15   4 -437.32  913.11
  -5 -15   4   98.60  751.67
  -5  15   3 4660.05 1127.46
  -5 -15   3 6620.82 1189.68
   5 -15  -2 6019.55 1973.59
  -5  15   2 4933.83 1213.63
  -5 -15   2 6821.01 1191.26
   5 -15  -1 2968.00 1082.81
  -5  15   1  840.23  885.50
  -5 -15   1 1698.34  875.25
   5 -15   0 3742.37 1283.61
  -5  15   0 3725.63 1135.88
  -5 -15   0 6866.81 1087.41
   5 -15   1 3824.48 1221.05
  -5 -15  -1 5542.01 1048.39
  -5  15  -1 4097.01 1180.48
   5 -15   2  449.49 1014.10
  -5  15  -2  515.39  991.54
  -5 -15  -2 2636.84  838.06
   5 -15   3  138.77  907.72
  -5  15  -3 1287.39  987.47
  -5 -15  -3  962.27  813.13
   5 -15   4  741.34 1006.37
  -5  15  -4 2844.26 1060.24
  -5 -15  -4 2102.68  552.85
   5 -15   5 1515.39  953.48
  -5  15  -5  299.97  920.08
  -5 -15  -5   -0.77  772.34
   5 -15   6  990.83 1091.56
  -5  15  -6 1494.79 1070.20
  -5 -15  -6 2628.82  873.33
   5 -15   7  849.53  960.23
  -5  15  -7  -97.28 1019.58
  -5 -15  -7 1029.61  753.77
   5 -15   8 -311.74  936.42
  -5  15  -8 -374.84  955.84
  -5 -15  -8 -331.82  717.10
   5 -15   9  280.29  882.31
  -5  15  -9 -492.82  933.94
  -5 -15  -9   58.42  657.08
   5 -15  10 2250.40 1110.07
  -5  15 -10   81.42 1141.31
  -5 -15 -10 1664.18  822.92
  -5 -17   7 -788.32 1046.48
  -5 -17   6 -806.26 1058.52
  -5 -17   5  825.45  967.75
  -5  17   4 1149.34  769.48
  -5 -17   4   71.40  947.19
  -5  17   3  843.02  839.92
  -5 -17   3  430.62  930.42
  -5  17   2 2398.85 1001.15
  -5 -17   2 2861.31 1101.51
  -5  17   1 5033.80 1256.80
  -5 -17   1 4494.90 1204.27
  -5  17   0 4934.56 1274.73
  -5 -17   0 4710.14  708.45
  -5  17  -1 2391.91 1045.18
  -5 -17  -1 1971.68  946.03
  -5  17  -2 2441.91 1022.63
  -5 -17  -2  512.12  947.28
  -5  17  -3 1588.97  996.59
  -5 -17  -3  930.31  589.43
  -5  17  -4 1894.06 1066.21
  -5 -17  -4  795.78 1007.80
   5 -17   5  714.41  971.98
  -5  17  -5-1725.81  996.25
  -5 -17  -5 -142.29  833.84
  -6   0  2011377.58 1520.95
  -6   0  19  446.21  849.91
  -6   0  1812177.86 1577.56
  -6   0  17 -156.25  825.98
  -6   0  1683738.65 5031.72
  -6   0  15 -959.57  912.73
  -6   0  14346952.223079.89
  -6   0  13 -169.58  841.02
  -6   0  12441245.831089.14
  -6   0  11  -35.86  773.91
  -6   0  10 3161.20 1130.57
  -6   0   9 -165.30  801.24
  -6   0   8 2553.80  972.45
  -6   0   7 -134.62   77.22
  -6   0   7    0.32   91.83
  -6   0   7 -136.62  863.74
  -6   0   650997.71 1594.58
  -6   0   654173.34 3461.52
  -6   0   643549.04 1439.73
   6   0  -5  -21.81  122.02
   6   0  -5 -748.94 1221.29
  -6   0   5  -51.14  184.24
   6   0  -4 3493.47 1451.17
  -6   0   4 3178.43  372.86
   6   0  -3  629.07  808.78
  -6   0   3  136.04  333.79
   6   0  -235123.59 2371.17
  -6   0   235571.90 1409.30
   6   0  -1   87.91  692.21
  -6   0   1  345.61  338.09
   6   0   0913905.378584.38
   6   0   1  236.57  575.95
  -6   0  -1   20.90  388.03
   6   0   2263509.514835.28
  -6   0  -2250984.213503.62
   6   0   3 -399.02  546.37
  -6   0  -3  605.87  443.80
   6   0   4211346.311770.97
  -6   0  -4218819.811575.50
   6   0   5 -290.31  614.17
  -6   0  -5  175.10  470.56
   6   0   629784.00 2199.88
  -6   0  -631639.58 1778.29
   6   0   7  494.19  833.32
  -6   0  -7  -62.48  519.37
   6   0   8 7813.98 1580.33
  -6   0  -8 6853.73  913.75
   6   0   9  432.57 1157.11
  -6   0  -9 -490.83  618.68
   6   0  10  375.67 1277.58
  -6   0 -10  503.94  640.29
   6   0  11   27.29 1252.60
  -6   0 -11  723.30  698.23
   6   0  1214144.53 2112.74
  -6   0 -1211977.36 1383.14
   6   0  13 -144.03 1118.89
  -6   0 -13  -50.78  704.11
   6   0  14102630.2 7277.98
  -6   0 -14112428.3 6644.79
   6   0  15 -264.63 1202.65
  -6   0 -15 -243.19  783.18
   6   0  16 4728.96 1690.79
  -6   0 -16 5415.74 1117.70
   6   0  17  231.98 1118.72
  -6   0 -17  133.95  811.37
   6   0  18 2944.55 1535.70
  -6   0 -18 3358.87 1153.01
   6   0  19 2828.40 1360.68
  -6   0 -19    8.48  961.52
  -6  -2  20 9994.82 1543.49
  -6   2  2012424.57 1670.47
  -6   2  19   -9.03  910.67
  -6  -2  19 -610.34  835.76
  -6  -2  18  878.11  919.43
  -6   2  18  793.56  940.18
  -6   2  17 2484.05 1195.17
  -6  -2  17 3330.47 1163.68
  -6   2  16  605.64  871.28
  -6  -2  16 -210.40  859.39
  -6   2  1529407.20 2472.20
  -6  -2  1525124.36 2410.75
  -6  -2  1412713.55 1491.96
  -6   2  1410123.83 1520.56
  -6   2  13 7705.49  910.07
  -6  -2  13 4444.15 1296.68
  -6   2  1275769.98 4694.99
  -6  -2  1276122.39 4400.59
  -6   2  11-1009.67  984.86
  -6  -2  11 -201.52  788.31
  -6  -2  1042205.59 2681.51
  -6   2  1038878.23 2871.90
  -6   2   938497.23 3123.32
  -6  -2   938802.55 2751.63
  -6   2   829493.26 2468.20
  -6  -2   824507.93  852.52
  -6  -2   827583.18 1999.04
  -6  -2   7 3105.31  303.52
  -6  -2   7 1425.95  909.00
  -6   2   7 1925.79 1253.88
   6  -2  -659955.87 4881.69
  -6   2   648911.75 1528.61
  -6  -2   654302.58 1981.38
  -6  -2   656707.00 3158.60
   6  -2  -5 9963.58 2121.03
  -6  -2   510774.80  622.18
  -6   2   5 8746.35  456.10
  -6  -2   512029.21 1401.51
   6  -2  -436415.28 1294.35
   6  -2  -435292.15 2669.51
  -6   2   441044.83 1590.91
  -6  -2   443405.75 2606.44
  -6  -2   438954.68 1392.96
   6  -2  -3 1024.02  874.22
   6   2  -3  721.89  986.06
  -6   2   3  458.80  410.46
  -6  -2   3  467.36  286.32
   6   2  -2111005.2 6846.56
   6  -2  -2110719.0 6177.07
  -6   2   2103653.9 4343.13
  -6  -2   2105897.0 4448.94
   6  -2  -1  261.14  671.52
   6   2  -1  180.84  567.91
  -6   2   1   51.27  339.55
  -6  -2   1  -62.88  309.68
   6   2   087230.54 4331.08
   6  -2   087770.61 4696.64
  -6   2   086366.72 4154.23
  -6  -2   084182.10 3610.81
   6   2   1 1602.12  869.78
   6  -2   1 1270.39  778.37
  -6   2  -1 2372.93  560.14
  -6  -2  -1 2393.14  507.12
   6  -2   2111820.3 5926.44
   6   2   2110714.2 5363.32
  -6   2  -2113365.1 5257.94
  -6  -2  -2105981.7 4900.38
   6  -2   3  961.33  680.21
   6   2   3  957.79  694.22
  -6   2  -3  122.73  534.77
  -6  -2  -3  550.22  489.61
   6  -2   497144.28 5225.11
   6   2   4103346.5 5466.05
  -6   2  -4102114.8 4947.38
  -6  -2  -4100448.9 4732.73
   6  -2   5 1978.11  559.22
   6   2   5 1740.63  653.59
  -6   2  -5 2381.78  690.05
  -6  -2  -5 2157.37  602.07
   6  -2   6 6467.61 1345.78
   6   2   6 7161.35  970.37
  -6   2  -6 6740.34  904.07
  -6  -2  -6 7057.18  569.85
   6  -2   7 -334.29  953.60
   6   2   7 -109.16  702.45
  -6   2  -7  -53.18  562.80
  -6  -2  -7  194.92  280.12
   6  -2   8  253.54 1154.33
   6   2   8 -195.46 1219.57
  -6   2  -8  223.81  576.79
  -6  -2  -8  165.01  321.12
   6  -2   9  524.98 1208.44
   6   2   9   70.36  966.48
  -6   2  -9  228.62  630.79
  -6  -2  -9   81.88  307.48
   6  -2  1037712.84 3841.26
   6   2  1040512.57 3387.62
  -6   2 -1037803.91 2436.22
  -6  -2 -1037240.01 2301.38
   6  -2  11 -405.38 1527.67
   6   2  11  905.56 1206.16
  -6   2 -11 1261.94  778.35
  -6  -2 -11  696.31  696.38
   6  -2  12 5487.31 1793.78
   6   2  12 2325.86 1442.42
  -6   2 -12 5208.19 1111.03
  -6  -2 -12 5437.63  966.06
   6  -2  1318115.08 2527.04
   6   2  1313608.87 2050.33
  -6   2 -1316117.53 1779.99
  -6  -2 -1316543.72 1564.08
   6  -2  1419619.19 2700.19
   6   2  1421258.57 2411.17
  -6   2 -1422346.80 2023.66
  -6  -2 -1422807.81 1811.51
   6   2  15 -925.17 1516.82
   6  -2  15 2001.43 1287.25
  -6   2 -15   49.80  818.74
  -6  -2 -15  387.17  719.74
   6  -2  1631264.75 3248.74
   6   2  1632153.25 2964.96
  -6   2 -1635965.51 2684.70
  -6  -2 -1634525.34 2531.77
   6  -2  17  665.81 1205.81
   6   2  17  180.21 1097.80
  -6   2 -17  325.88  896.06
  -6  -2 -17  649.60  822.04
   6  -2  18 -869.00 1268.26
   6   2  18 2216.36 1195.14
  -6   2 -18 1025.60  975.41
  -6  -2 -18  893.66  858.09
   6   2  19 2686.69 1237.43
  -6   2 -19 -472.23  985.23
  -6  -2 -19  688.17  885.16
  -6   4  20 3570.72 1492.04
  -6  -4  20 6317.68 1331.29
  -6   4  19 1457.70 1149.58
  -6  -4  19 2675.50 1097.09
  -6   4  18 -814.06  842.78
  -6  -4  18  176.36  472.99
  -6   4  17 3897.67 1266.15
  -6  -4  17 4417.28 1215.81
  -6   4  16  383.88  852.17
  -6  -4  16 -147.90  781.14
  -6   4  15 1466.81 1092.49
  -6  -4  15  991.06  893.25
  -6   4  14 3733.69 1342.00
  -6  -4  14 4981.54 1153.05
  -6   4  13 3909.72 1423.76
  -6  -4  13 4511.01 1139.95
  -6   4  12 5117.90 1497.58
  -6  -4  12 5748.43 1068.63
  -6   4  11  722.97  982.97
  -6  -4  11   96.08  694.68
  -6  -4  10 -151.78  278.93
  -6   4  10  897.16  949.34
  -6  -4  10  300.37  622.63
  -6  -4   9  618.87  659.34
  -6  -4   9  505.39  333.16
  -6   4   9  192.80  651.57
  -6  -4   8 7220.51  976.48
  -6  -4   8 6133.93  409.10
  -6   4   8 7425.76  942.05
   6  -4  -7    3.06 1424.27
  -6  -4   7  -77.58  225.54
  -6  -4   7 -592.39  562.99
   6  -4  -6 8355.02 2061.60
  -6  -4   6 8168.43  594.28
  -6   4   6 6735.82  373.21
  -6  -4   610535.15 1165.83
   6  -4  -5  174.12  163.64
   6  -4  -5 -216.90 1017.42
  -6   4   5   88.04  285.56
  -6  -4   5  330.80  499.99
  -6  -4   5  -79.61  245.77
   6  -4  -4 2488.14 1098.69
  -6   4   4 3733.06  517.20
  -6  -4   4 2720.82  507.43
  -6  -4   4 2772.22  613.07
   6  -4  -3  163.93  890.86
  -6   4   3 2077.13  389.16
  -6  -4   3  260.87  359.91
  -6  -4   3  477.52  819.92
   6  -4  -2104781.8 5947.72
  -6  -4   2109546.1 5344.73
  -6  -4   2104042.3 4591.88
  -6   4   2115348.5 5447.76
   6  -4  -1 3539.56 1127.47
   6   4  -1 8204.50 1076.04
  -6   4   1 3790.26  952.20
  -6  -4   1 7558.00  645.36
   6   4   024120.99 1702.89
   6  -4   024273.00 1744.17
  -6   4   024791.33 1384.18
  -6  -4   025009.81 1258.09
   6  -4   1 2683.51  869.76
   6   4   1 2503.65  748.09
  -6   4  -1 1946.93  632.41
  -6  -4  -1 3536.85  555.54
   6  -4   2  280.49  717.38
   6   4   2  147.85  516.86
  -6   4  -2  729.63  726.85
  -6  -4  -2  240.59  435.94
   6  -4   311063.07 1255.39
   6   4   310821.07  957.38
  -6   4  -310645.71 1040.90
  -6  -4  -312816.44  976.21
   6  -4   412417.67 1323.06
   6   4   414039.25 1064.79
  -6   4  -413813.24 1148.26
  -6  -4  -413460.36  975.34
   6  -4   5  506.70  817.94
   6   4   5  336.44  519.89
  -6   4  -5  134.38  574.08
  -6  -4  -5  169.95  463.62
   6   4   626867.12 1779.93
   6  -4   626547.88 2394.62
  -6   4  -626049.16 1744.42
  -6  -4  -625483.80 1514.00
   6  -4   7 2676.94 1271.24
   6   4   7 2261.90  930.62
  -6   4  -7 1909.64  804.62
  -6  -4  -7 2609.28  677.52
   6  -4   858662.87 4677.03
   6   4   860024.08 3993.67
  -6   4  -859738.22 2869.71
  -6  -4  -858646.12 3059.99
   6  -4   9 -675.75 1448.86
   6   4   9  761.06  868.41
  -6   4  -9 1145.66  727.43
  -6  -4  -9  197.39  557.79
   6   4  10  316.44 1450.07
   6  -4  10 3256.45 1609.79
  -6   4 -10 1503.61  827.85
  -6  -4 -10  932.29  378.19
   6  -4  11 3320.15 1727.22
   6   4  11 1216.65 1132.75
  -6   4 -11 1118.06  924.15
  -6  -4 -11 1677.91  731.36
   6  -4  1213724.34 2499.94
   6   4  1210893.82 1576.84
  -6   4 -1211341.07 1523.55
  -6  -4 -1212012.10 1197.02
   6  -4  13 5565.06 1910.97
   6   4  13 3089.95 1613.29
  -6   4 -13 3310.66 1152.95
  -6  -4 -13 3359.42  929.49
   6  -4  1412940.88 2436.11
   6   4  1411872.64 1558.59
  -6   4 -1411285.07 1055.96
  -6  -4 -1414274.62 1388.22
   6  -4  15  971.52  822.47
   6   4  15  268.06 1009.52
  -6  -4 -15  442.94  745.39
   6   4  16 5136.39 1385.34
   6  -4  16 4117.67 1838.80
  -6   4 -16 5882.62  860.73
  -6  -4 -16 6245.38 1060.25
   6  -4  17  940.95 1605.19
   6   4  17 1621.88 1229.78
  -6   4 -17 1673.86 1233.14
  -6  -4 -17 3536.35  975.69
   6  -4  18 -248.68 1345.54
  -6   4 -18  260.64 1005.61
  -6  -4 -18  939.78  782.33
  -6   6  19  522.44 1009.33
  -6  -6  19 1083.72 1012.91
  -6  -6  18 -115.44  905.55
  -6   6  18 -390.19  948.72
  -6   6  17 -297.37 1028.43
  -6  -6  17-1493.54  903.31
  -6  -6  16 1296.92  916.96
  -6   6  16 2286.63 1079.56
  -6   6  15 1372.85 1173.13
  -6  -6  15 1346.47  874.66
  -6   6  14 1501.56 1159.37
  -6  -6  14 1643.93  877.67
  -6   6  13  -29.77  642.42
  -6  -6  13  272.37  679.30
  -6  -6  12  286.42  682.25
  -6   6  12  787.67 1114.50
  -6   6  11 1485.80 1210.83
  -6  -6  11  302.85  643.89
  -6  -6  11  516.16  363.50
  -6  -6  10  142.29  479.54
  -6   6  10  803.01 1105.59
  -6  -6  10  122.05  608.36
  -6  -6   9  216.15  339.39
  -6   6   9  877.45 1200.56
  -6   6   8  735.99  722.40
  -6  -6   8 1611.78  514.12
  -6  -6   8 1333.25  570.84
   6  -6  -7 1795.87 1696.74
  -6   6   7 1627.08  295.07
  -6  -6   7 2888.87  563.13
  -6  -6   7 2123.78  582.28
   6  -6  -622510.47 2509.68
  -6   6   623999.18 1126.63
  -6  -6   625094.94 1599.17
  -6  -6   623500.01 1156.63
   6  -6  -5 -122.72  910.27
  -6   6   5  268.77  367.73
  -6  -6   5  -95.94  324.52
   6  -6  -4 1468.86 1065.99
  -6   6   4 1267.55  405.51
  -6  -6   4 2072.77  446.19
  -6  -6   4 1967.77  633.22
   6  -6  -3  616.29  824.77
  -6  -6   3  212.77  385.07
  -6   6   3  282.26  390.15
  -6  -6   3 -497.13  484.06
   6  -6  -220681.60 1904.76
  -6  -6   221811.92 1336.95
  -6  -6   220746.27 1162.07
  -6   6   225834.93 1412.27
   6  -6  -1 1437.18  759.81
  -6   6   1  100.81  542.57
  -6  -6   1  809.94  444.53
  -6  -6   1  236.36  416.11
   6  -6   030268.35 2072.34
  -6  -6   028549.72 1517.12
  -6  -6   032271.01 1570.27
  -6   6   029996.94 1773.94
   6   6   1 5709.11  950.47
   6  -6   1 6744.97 1089.74
  -6   6  -1 4158.03  919.35
  -6  -6  -1 7202.47  775.28
   6  -6   2 9134.26 1182.64
   6   6   2 7210.20  734.14
  -6   6  -2 8369.73 1024.41
  -6  -6  -2 7934.12  778.38
   6  -6   3 -226.00  726.50
   6   6   3  131.44  377.13
  -6   6  -3 1213.77  674.18
  -6  -6  -3  858.08  487.61
   6  -6   4  792.53  760.52
   6   6   4  395.87  345.86
  -6   6  -4  107.30  687.44
  -6  -6  -4  753.18  489.40
   6   6   5 7104.83  688.90
   6  -6   5 6815.89 1440.99
  -6   6  -5 9953.85 1270.60
  -6  -6  -511557.15  975.74
   6  -6   6 3986.80 1209.41
   6   6   6 2234.85  498.14
  -6   6  -6 3480.79  938.00
  -6  -6  -6 2871.26  645.32
   6  -6   7 2370.26 1396.51
   6   6   7 2220.84  488.91
  -6   6  -7 2542.78 1021.11
  -6  -6  -7 6288.77  723.55
   6  -6   8  660.17 1239.08
   6   6   8  752.31  450.42
  -6   6  -8  923.29  844.21
  -6  -6  -8 1032.15  599.19
   6   6   9 -614.41  673.22
   6  -6   9  369.14  698.38
  -6   6  -9  298.04  739.49
  -6  -6  -9    2.09  503.36
   6  -6  10 1249.81 1546.94
   6   6  10  213.34  735.47
  -6   6 -10  684.18  927.83
  -6  -6 -10 1491.07  631.89
   6   6  11  994.93 1128.91
   6  -6  11  365.12 1572.57
  -6   6 -11  537.70  537.43
  -6  -6 -11  954.58  643.21
   6  -6  12 2452.39 1619.38
  -6   6 -12  792.93  971.22
  -6  -6 -12  777.85  646.48
   6  -6  13 4008.07 2195.76
  -6   6 -13 4065.36 1420.85
  -6  -6 -13 9101.05 1054.85
   6  -6  14-1129.39 1526.91
  -6   6 -14  836.38  993.25
  -6  -6 -14  983.68  667.09
   6  -6  15 -863.98 1391.17
  -6  -6 -15  366.02  604.86
  -6   6 -15 -920.54  912.25
   6  -6  1619728.24 2940.06
  -6   6 -1620873.19 2345.73
  -6  -6 -1620762.86 1725.60
   6  -6  17 -170.63 1334.31
  -6   6 -17-1122.19  992.45
  -6  -6 -17  662.46  677.19
   6  -6  18 3693.10 1819.49
  -6   6 -18 3115.17 1439.14
  -6  -6 -18 3105.14  969.95
  -6   8  18  471.97  885.99
  -6  -8  18 -430.47  845.89
  -6   8  17 -159.27  996.20
  -6  -8  17 -582.78  881.56
  -6   8  16 2985.68 1169.74
  -6  -8  16  -31.95  895.72
  -6   8  15  955.06 1127.36
  -6  -8  15  507.54  811.00
  -6   8  14 4193.62 1457.72
  -6  -8  14 4158.90 1360.91
  -6   8  13 3708.04 1483.18
  -6  -8  13 2276.91  905.67
   6   8 -1215148.80 1390.40
  -6   8  1215561.24 2133.73
  -6  -8  1214729.35 1356.00
   6   8 -1110172.00  958.57
  -6   8  11 8209.46 2039.67
  -6  -8  1110709.63 1490.82
  -6   8  10 1217.77 1215.07
  -6  -8  10  569.93  534.75
  -6  -8  10 -275.04  235.83
  -6  -8   9 7757.80  888.79
  -6   8   9 6064.88 1997.52
  -6  -8   9 9528.96  824.72
   6  -8  -828409.73 3645.16
  -6  -8   823638.68 1347.29
  -6  -8   825390.98 1429.57
   6  -8  -7 -712.60 1387.17
  -6  -8   7  303.83  351.19
  -6  -8   7 -177.29  433.21
   6  -8  -6  869.48 1336.83
  -6   8   6  868.33  503.72
  -6  -8   6 1727.52  554.02
  -6  -8   6 1440.42  544.53
   6  -8  -514864.21 2138.22
  -6  -8   515744.66  939.27
  -6   8   515196.61 1284.48
  -6  -8   520440.96 1295.29
   6  -8  -413590.43 1723.49
  -6   8   411664.72  869.42
  -6  -8   412303.67  932.55
  -6  -8   412162.29  821.09
   6  -8  -3 2591.76 1296.06
  -6   8   3 4184.76  690.59
  -6  -8   3 5378.58  686.33
  -6  -8   3 4734.04  550.76
   6  -8  -2  607.57  904.04
  -6   8   2   33.00  551.92
  -6  -8   2  938.83  522.32
  -6  -8   2  864.89  304.62
   6  -8  -1 3079.03 1162.44
  -6  -8   1 4331.48  722.50
  -6   8   1 4243.79  835.85
   6  -8   0  672.73  793.98
  -6   8   0  939.53  654.88
  -6  -8   0  566.18  509.59
   6  -8   1  621.78  779.61
  -6   8  -1  833.73  716.01
  -6  -8  -1  464.09  522.99
   6  -8   2 -352.54  718.08
  -6   8  -2  639.93  668.96
  -6  -8  -2 -211.30  485.17
   6  -8   3 4839.39 1273.61
  -6   8  -3 6724.15 1260.60
  -6  -8  -3 7137.15  880.77
   6  -8   410679.29 1426.18
  -6   8  -4 9559.60 1377.08
  -6  -8  -4 8928.72  933.20
   6  -8   5 1484.40  806.94
  -6   8  -5 -613.53  817.10
  -6  -8  -5 -444.99  479.02
   6  -8   6 5637.17 1498.88
  -6   8  -6 7286.95  860.10
  -6  -8  -6 7771.27  886.58
   6  -8   7    2.26 1054.36
  -6   8  -7 1038.95  879.38
  -6  -8  -7 -235.19  490.61
   6  -8   8  801.34 1168.18
  -6   8  -8 -315.86  925.15
  -6  -8  -8  286.47  539.00
   6  -8   9  929.36 1283.25
  -6   8  -9  431.01 1009.48
  -6  -8  -9  698.93  581.11
   6  -8  10  272.71 1404.94
  -6   8 -10 1208.74  623.04
  -6  -8 -10 1020.93  614.21
   6  -8  11  989.46 1516.91
  -6  -8 -11  814.60  662.74
  -6   8 -11 1638.60  653.39
   6  -8  12  -44.00 1327.98
  -6   8 -12  153.67  953.59
  -6  -8 -12   82.58  558.70
  -6   8 -13 1219.32 1000.84
  -6  -8 -13 -179.71  584.08
   6  -8  14-1388.41 1425.10
  -6   8 -14  492.86 1078.07
  -6  -8 -14  604.77  379.15
   6  -8  15  -38.82 1444.35
  -6  -8 -15  993.29  693.07
  -6   8 -15 -394.32 1073.45
   6  -8  16 4393.83 1857.86
  -6   8 -16 7071.71 1436.58
  -6  -8 -16  661.76  899.24
  -6   8 -17  255.74 1242.45
  -6  -8 -17  997.42  767.82
  -6  10  17 1669.31 1192.68
  -6 -10  17  905.80  997.55
  -6 -10  16 1524.52  963.96
  -6  10  16 1908.76 1353.12
  -6  10  15-1734.65 1110.80
  -6 -10  15  528.73  776.53
  -6 -10  14 2491.67 1215.06
  -6  10  14  298.35 1443.94
   6  10 -13 -123.12  541.73
  -6  10  13  599.98 1133.05
  -6 -10  13  138.95  651.17
   6  10 -1215378.74 1626.85
  -6  10  1216001.63 2175.11
  -6 -10  1212946.50 1326.41
   6  10 -11 8448.73 1023.64
  -6  10  11 5816.07 1848.77
  -6 -10  11 3772.16 1283.34
  -6  10  10 2927.98 1774.58
  -6 -10  10 4150.54 1045.42
  -6  10   9 3713.08 1937.35
  -6 -10   9 6355.83  578.69
   6 -10  -8 8561.02 2764.39
  -6 -10   8 9200.97 1071.55
   6 -10  -7 4533.25 2423.30
  -6 -10   7 8935.19  992.66
   6 -10  -6 5286.70 2132.74
  -6 -10   611186.44 1131.67
  -6  10   612249.08 1226.19
   6 -10  -594746.45 7747.55
  -6  10   5100729.2 6494.78
  -6 -10   5109273.3 6234.70
   6 -10  -422308.24 2308.34
  -6  10   418129.55 1710.88
   6 -10  -328942.34 2820.47
  -6  10   328230.70 1995.25
  -6 -10   335492.44 2194.11
   6 -10  -2  802.36 1002.06
  -6  10   2  422.34  633.23
  -6 -10   2 1191.84  617.54
   6 -10  -1 6592.60 1419.41
  -6  10   1 5647.45 1118.70
  -6 -10   1 8953.12  976.32
   6 -10   0 2710.52 1093.88
  -6  10   0 3901.86  915.51
  -6 -10   0 3073.97  447.80
   6 -10   1 6479.72 1294.73
  -6 -10  -1 6923.44  918.59
  -6  10  -1 4471.35 1195.86
   6 -10   2 -694.91  814.75
  -6  10  -2  122.71  806.13
  -6 -10  -2  669.52  569.79
   6 -10   3 3036.90 1093.51
  -6  10  -3 1009.93 1062.26
  -6 -10  -3 2710.17  724.59
   6 -10   4 1786.54 1000.28
  -6  10  -4 2229.44 1061.94
  -6 -10  -4 1688.84  685.83
   6 -10   5  211.45  892.96
  -6  10  -5  866.25  924.06
  -6 -10  -5    9.30  564.53
   6 -10   615988.68 1817.30
  -6  10  -618452.19 2086.92
  -6 -10  -614663.12 1240.23
   6 -10   7 1673.07 1210.26
  -6  10  -7 1328.82 1215.99
  -6 -10  -7 2830.08  719.93
   6 -10   816541.78 2160.35
  -6  10  -817156.20 2097.85
  -6 -10  -815479.95 1295.54
   6 -10   9  233.04 1131.41
  -6  10  -9 -293.49 1025.91
  -6 -10  -9 -463.12  567.39
   6 -10  10 -659.04 1135.64
  -6  10 -10 -249.86  984.59
  -6 -10 -10   90.29  550.08
   6 -10  11 7632.02 1970.06
  -6  10 -11 7220.41 1701.96
  -6 -10 -11 8748.01 1029.69
   6 -10  12 -797.44 1229.16
  -6  10 -12  958.59  977.55
  -6 -10 -12  -57.00  572.27
   6 -10  13 3772.74 1668.58
  -6 -10 -13 3792.25  847.79
  -6  10 -13 2689.79 1384.40
   6 -10  14-1692.75 1273.89
  -6  10 -14  425.28 1041.10
  -6 -10 -14  439.64  619.85
   6 -10  15  662.87 1560.89
  -6  10 -15  310.57 1286.18
  -6 -10 -15 1869.60  759.82
  -6  12  15  920.91 1277.39
  -6  12  14   58.24 1087.69
   6  12 -13  710.62 1059.91
  -6  12  13 1372.14 1346.89
   6  12 -12 -236.54  678.25
  -6  12  12 1783.30 1159.07
   6  12 -11  249.08  705.07
  -6  12  11  512.55 1236.46
  -6  12  10 4960.04 1573.89
  -6 -12  10 1028.62  501.82
  -6  12   9 2173.82 1603.50
  -6 -12   9 2757.03  928.75
   6 -12  -823681.41 4247.62
  -6 -12   825832.76 2075.58
   6 -12  -7 1578.27 1653.31
  -6 -12   7 -957.97  749.14
   6 -12  -629737.97 4317.60
  -6 -12   630132.28 2152.33
  -6  12   520844.65 1683.97
  -6 -12   525943.09 1984.76
  -6 -12   4  891.85  743.34
  -6  12   4 1609.07  898.68
   6 -12  -3 4748.31 1460.68
  -6  12   3 4872.12 1235.16
  -6 -12   3 6565.48 1036.51
   6 -12  -232567.63 2744.39
  -6  12   231154.10 2183.81
  -6 -12   226435.03 1912.10
   6 -12  -1 5044.10 1462.76
  -6  12   1 8004.87 1168.57
  -6 -12   1 9053.04 1115.04
   6 -12   0  655.15  984.01
  -6 -12   0  774.89  687.86
  -6  12   0 1675.78 1097.49
   6 -12   1 4807.84 1329.19
  -6  12  -1 4359.46 1113.61
  -6 -12  -1 4212.65  954.78
   6 -12   218654.06 1941.13
  -6  12  -215456.46 1728.13
  -6 -12  -215066.88 1390.68
   6 -12   3 1100.46  829.43
  -6  12  -3   59.83  857.13
  -6 -12  -3 -147.79  608.60
   6 -12   4 1550.65 1076.81
  -6 -12  -4 1940.19  731.78
  -6  12  -4  710.01 1039.28
   6 -12   510654.62 1479.31
  -6  12  -5 4686.97 1617.34
   6 -12   610968.11 1522.04
  -6  12  -6 4057.22 1595.82
  -6 -12  -6 9449.01 1061.36
   6 -12   7 -431.22  935.50
  -6  12  -7 -729.84 1006.18
  -6 -12  -7  -55.60  605.82
   6 -12   8 7488.11 1633.03
  -6  12  -8 9746.68 1690.78
  -6 -12  -8 9752.33 1114.25
   6 -12   9 4463.73 1491.70
  -6  12  -9 5326.40 1439.64
  -6 -12  -9 4714.41  567.48
   6 -12  10 3548.66 1394.40
  -6  12 -10 1580.59 1335.23
  -6 -12 -10 2787.97  810.52
   6 -12  11-2569.39 1173.95
  -6  12 -11 3019.16 1138.65
  -6 -12 -11  744.76  680.82
   6 -12  12  175.73 1322.69
  -6  12 -12 2468.00 1166.82
  -6 -12 -12  602.29  726.61
   6 -12  13 3852.65 1982.70
  -6  12 -13 8151.17 1755.60
  -6 -12 -13 9219.16 1200.46
  -6  14  12 4627.82 1289.32
  -6 -14  12   -2.64  564.76
  -6 -14  11  576.01  542.40
  -6  14  11  257.92 1284.47
  -6  14  10  551.72 1484.24
  -6 -14  10 1701.63 1018.94
  -6  14   9 1130.18 1478.37
  -6 -14   9  959.44 1041.20
  -6  14   8 6261.06 1266.38
  -6 -14   811721.44 1507.98
   6 -14  -7 1550.50 1961.14
  -6 -14   7  369.05  898.00
   6 -14  -6  665.90 1578.70
  -6 -14   6   49.79  821.45
   6 -14  -5 2923.84 1903.38
  -6 -14   5 7259.73 1277.25
   6 -14  -4 -649.57 1135.10
  -6  14   4  595.44  682.11
  -6 -14   4   82.96  772.49
   6 -14  -3 5666.60 1957.38
  -6  14   311100.93 1309.03
  -6 -14   313247.07 1544.17
   6 -14  -2  676.74 1145.41
  -6  14   2  592.14  750.12
  -6 -14   2 1615.59  828.41
   6 -14  -1 2368.49 1250.59
  -6  14   1 2535.83  949.50
  -6 -14   1 3475.20  964.60
   6 -14   0  -70.24  875.63
  -6  14   0   -0.92  727.81
  -6 -14   0   37.56  666.00
   6 -14   1  330.72 1032.46
  -6  14  -1 1244.27  872.34
  -6 -14  -1 1304.83  788.47
   6 -14   213353.29 1972.50
  -6  14  -217082.72 1813.65
  -6 -14  -217449.10 1525.11
   6 -14   3  294.74  921.38
  -6  14  -3 -118.06  876.39
  -6 -14  -3  479.78  417.96
   6 -14   4  678.99  888.41
  -6  14  -4  415.42  908.74
  -6 -14  -4  166.41  663.68
   6 -14   5  870.93  892.44
  -6  14  -5 -100.27  872.05
  -6 -14  -5 -179.05  600.96
   6 -14   618343.81 2123.42
  -6 -14  -619974.36 1616.16
  -6  14  -616110.09 2075.09
   6 -14   7 2679.91 1214.27
  -6  14  -7 3793.66 1276.55
  -6 -14  -7 1615.19  921.05
   6 -14   8 8392.39 1419.47
  -6  14  -8 4435.77 1495.36
  -6 -14  -8 5073.28 1048.34
   6 -14   9  986.95  993.63
  -6  14  -9  789.82 1083.24
  -6 -14  -9  440.28  425.78
   6 -14  10 3354.89 1116.46
  -6 -14 -10  793.92  823.33
  -6  14 -10 -336.18 1179.68
   6 -14  11 2771.71 1358.56
  -6 -14 -11 2687.82  992.99
  -6 -16   8 -325.82  949.90
  -6 -16   7  325.83  972.81
  -6 -16   615232.92 1903.76
  -6 -16   5 3462.60 1222.74
   6 -16  -4  596.73 1282.95
  -6 -16   4  650.84  969.95
   6 -16  -3  377.34 1393.32
  -6  16   3  713.30  913.77
  -6 -16   3 3112.38 1038.45
   6 -16  -2  486.64 1308.56
  -6  16   2 1206.34  929.35
  -6 -16   2 1700.71  975.87
   6 -16  -1  277.73 1314.40
  -6  16   1 1541.49  943.02
  -6 -16   1 3405.75 1025.27
   6 -16   0 6201.54 1578.77
  -6  16   0 5376.66 1241.92
  -6 -16   0 8588.33 1314.68
   6 -16   1  -59.13  935.74
  -6  16  -1  808.14 1074.64
  -6 -16  -1 -316.22  739.61
   6 -16   2-1013.92  999.00
  -6  16  -2 -714.39  944.96
  -6 -16  -2 -114.09  795.80
   6 -16   3 3095.43 1246.48
  -6  16  -3  951.24 1154.64
  -6 -16  -3 3073.29  952.68
   6 -16   4  748.72  939.83
  -6  16  -4  473.26  870.50
  -6 -16  -4 -459.04  762.64
   6 -16   5 2199.78 1094.31
  -6  16  -5 1619.21 1090.19
  -6 -16  -5 1062.45  870.03
   6 -16   6 2672.41 1214.39
  -6  16  -6 4760.07 1241.41
  -6 -16  -6 2604.57  599.00
  -7   1  20  293.50  908.89
  -7  -1  20  -76.08  911.08
  -7  -1  19 1628.52 1218.56
  -7   1  19 3093.45 1126.99
  -7   1  18  -62.74  821.91
  -7  -1  18  300.98  930.70
  -7  -1  17 1076.27  981.09
  -7   1  17   -3.99  951.55
  -7   1  16  211.19  513.24
  -7  -1  16  -15.73  515.07
  -7  -1  1517832.65 1885.98
  -7   1  1513797.73 1780.65
  -7   1  14  721.73  942.07
  -7  -1  14 -161.84  895.41
  -7   1  13104679.7 6439.13
  -7  -1  13104363.5 6233.38
  -7   1  1252288.70 4049.65
  -7  -1  1258594.91 4149.14
  -7  -1  11123532.5 7436.10
  -7   1  11118772.3 7596.16
  -7   1  10 1204.28 1089.99
  -7  -1  10 1525.81 1125.31
  -7  -1   9 6508.81 1352.28
  -7   1   9 6124.42 1454.96
  -7  -1   8 3276.56 1140.67
  -7   1   8 4016.64 1400.05
  -7   1   7 7796.34 1570.57
  -7  -1   7 8343.33  392.40
  -7  -1   7 8267.23 1334.79
  -7   1   7 7818.96  290.02
   7  -1  -6 1363.68 1733.15
  -7   1   6 2820.08  288.17
  -7  -1   6 1630.80  285.57
  -7  -1   6 1540.33 1122.37
   7  -1  -521712.19 2651.38
  -7  -1   520332.72  852.85
  -7  -1   514658.81 1253.73
  -7   1   520826.26  875.86
   7   1  -4  129.73 1155.21
   7  -1  -4 -250.72 1030.65
  -7   1   4  547.79  334.95
  -7  -1   4  769.81  337.23
   7  -1  -3  688.56  924.67
   7   1  -3  943.09  966.45
  -7   1   3  848.77  285.92
  -7  -1   3  573.36  400.63
   7  -1  -236093.73 2788.65
   7   1  -242565.07 3629.97
  -7   1   240516.21 1927.27
  -7  -1   241165.76 1908.10
   7   1  -166821.24 3676.58
   7  -1  -165511.07 3822.73
  -7   1   167177.28 2812.04
  -7  -1   165470.81 3017.52
   7   1   0 2591.71  881.17
   7  -1   0 3470.87  934.21
  -7   1   0 4914.97  553.14
  -7  -1   0 2356.44  537.75
   7   1   112750.76 1189.47
   7  -1   113062.35 1326.11
  -7   1  -113259.08  881.84
  -7  -1  -113315.76  901.39
   7  -1   2 1307.60  718.24
   7   1   2 1322.47  884.11
  -7   1  -2 1395.04  534.49
  -7  -1  -2 1828.66  526.40
   7  -1   335586.90 2217.47
   7   1   330675.94 1858.05
  -7   1  -334732.05 1788.90
  -7  -1  -333739.76 1743.84
   7  -1   4   76.96  582.56
   7   1   4 -496.47  769.47
  -7   1  -4  101.51  475.77
  -7  -1  -4 -107.43  447.37
   7  -1   535223.66 2233.98
   7   1   538356.20 2220.30
  -7   1  -535808.20 2030.49
  -7  -1  -536401.47 1987.71
   7  -1   6 -361.79  751.91
   7   1   6 -344.08  631.62
  -7   1  -6  415.02  555.28
  -7  -1  -6  958.48  553.81
   7  -1   714888.80 1809.56
   7   1   719388.82 1693.43
  -7   1  -717262.01 1389.38
  -7  -1  -718534.94 1356.63
   7  -1   8  232.15  989.47
   7   1   8 -293.55  871.22
  -7   1  -8  584.23  626.20
  -7  -1  -8  284.07  610.83
   7   1   932466.43 2962.54
   7  -1   934485.40 3272.48
  -7   1  -935746.73 2332.13
  -7  -1  -934207.37 2156.06
   7   1  10  681.04 1145.33
   7  -1  10 1237.47 1273.70
  -7   1 -10  290.75  695.69
  -7  -1 -10  145.80  651.10
   7  -1  11 -530.63 1479.85
   7   1  11  971.89 1321.44
  -7   1 -11 1352.22  797.99
  -7  -1 -11  936.36  729.25
   7  -1  12  634.35 1386.04
   7   1  12-1145.51 1326.02
  -7   1 -12 -560.57  436.23
  -7  -1 -12 -522.06  716.00
   7  -1  13 3379.06 1782.30
   7   1  13 4023.74 1652.30
  -7   1 -13 1988.83  999.22
  -7  -1 -13 3950.05  614.20
   7   1  14  478.30 1301.66
   7  -1  14 1317.58 1420.31
  -7   1 -14  382.47  819.25
  -7  -1 -14  413.42  809.60
   7  -1  15 3564.02 1967.14
   7   1  15 5308.85 1809.19
  -7   1 -15 6363.80  838.91
  -7  -1 -15 9148.07 1248.32
   7   1  16  313.03 1151.75
   7  -1  16   79.73 1281.29
  -7   1 -16 -821.35  840.20
  -7  -1 -16  675.47  759.63
   7  -1  17 2508.80 1589.11
   7   1  17 3054.67 1461.94
  -7   1 -17 1967.53 1054.85
  -7  -1 -17 1608.71  982.54
   7   1  18 1886.88 1367.36
   7  -1  18   34.47 1518.18
  -7   1 -18 1239.59 1020.19
  -7  -1 -18  632.93  955.14
  -7   3  1921742.33 2291.69
  -7  -3  1924418.80 2256.33
  -7   3  18 3271.65 1296.09
  -7  -3  18 3171.48 1208.71
  -7   3  1714895.55 1869.13
  -7  -3  1720067.14 2047.85
  -7   3  16 5628.00 1250.37
  -7  -3  16 2819.15 1276.79
  -7   3  1516567.24 2051.16
  -7  -3  1518854.81 1909.85
  -7   3  1416810.35 2126.14
  -7  -3  1419729.47 1994.30
  -7   3  13 2511.69 1251.02
  -7  -3  13 3697.12 1107.42
  -7   3  12 1786.47 1309.08
  -7  -3  12 2600.37 1036.88
  -7   3  11 6384.63 1506.67
  -7  -3  11 7073.84 1198.23
  -7   3  10 3799.33 1503.13
  -7  -3  10 4516.04 1212.56
  -7  -3   9   18.32  769.53
  -7   3   9  272.50  657.49
  -7   3   8 -711.55  603.60
  -7  -3   8  232.10  255.95
  -7  -3   8  543.53  759.86
   7  -3  -7 7475.51 2372.58
  -7  -3   7 7251.01  516.48
  -7  -3   7 8754.12 1185.37
   7  -3  -6    6.84 1246.25
  -7   3   6 -158.39  216.99
  -7  -3   6   99.73  607.74
  -7  -3   6    2.43  194.87
   7  -3  -5 5314.26 1790.11
  -7  -3   511159.94 1191.53
  -7  -3   510317.25  526.47
  -7   3   5 9119.94  634.68
   7  -3  -4 1086.26  889.49
  -7   3   4 -119.88  345.85
  -7  -3   4  691.01  634.70
  -7  -3   4  -50.56  242.76
   7  -3  -398961.64 5917.60
   7   3  -392640.50 6324.75
  -7   3   399119.60 4518.51
  -7  -3   395425.11 4067.30
   7  -3  -2  764.76  874.55
   7   3  -2  770.06 1269.97
  -7   3   2  731.44  481.38
  -7  -3   2   75.38  348.09
   7  -3  -1 -315.96  796.69
   7   3  -1  817.22  666.83
  -7   3   1  430.78  551.12
  -7  -3   1  846.38  382.19
   7  -3   010672.10 1373.73
   7   3   013110.00 1206.40
  -7   3   011477.20  944.40
  -7  -3   014127.07  905.92
   7   3   1 2695.02  695.36
   7  -3   1 2547.35  890.98
  -7   3  -1 2866.95  632.45
  -7  -3  -1 3940.36  563.06
   7  -3   2 1836.80  890.76
   7   3   2 2227.82  864.26
  -7   3  -2 2529.46  664.42
  -7  -3  -2 3144.72  586.79
   7  -3   318777.82 1581.10
   7   3   318311.03 1453.20
  -7   3  -317394.51 1267.54
  -7  -3  -318130.01  850.04
   7  -3   4  130.70  684.02
   7   3   4  -38.16  430.07
  -7   3  -4  356.03  560.00
  -7  -3  -4 -782.14  458.78
   7   3   536612.69 1996.00
   7  -3   531136.05 2295.69
  -7   3  -534823.32 2092.53
  -7  -3  -533824.07 1840.07
   7  -3   6  882.65  865.42
   7   3   6  786.43  504.02
  -7   3  -6 1151.60  658.79
  -7  -3  -6   35.13  550.97
   7   3   719309.28 1485.94
   7  -3   719335.29 2187.85
  -7   3  -720688.95 1667.05
  -7  -3  -720270.98 1433.99
   7  -3   8 5906.27 1434.82
   7   3   8 3088.52  901.28
  -7   3  -8 1312.89  941.81
  -7  -3  -8 2807.34  773.11
   7   3   967401.39 4272.33
   7  -3   960868.21 4994.81
  -7   3  -965038.42 3926.86
  -7  -3  -962645.62 3403.41
   7  -3  10 6709.27 2092.14
   7   3  10 6870.74 1524.67
  -7   3 -10 7347.16 1343.79
  -7  -3 -1011253.43 1176.55
   7   3  1114374.18 1892.40
   7  -3  1111059.93 2505.32
  -7   3 -1111741.84 1452.32
  -7  -3 -1110241.03 1246.34
   7  -3  12 2328.74 2281.78
   7   3  12 4823.44 1752.56
  -7   3 -1210293.78 1373.63
  -7  -3 -1210214.04 1211.25
   7   3  13 -254.27 1040.82
   7  -3  13 -480.71  805.20
  -7   3 -13  790.71  778.64
  -7  -3 -13  219.92  646.67
   7  -3  14-1312.75 1442.09
   7   3  14  816.71 1067.78
  -7   3 -14 -707.76  809.57
  -7  -3 -14 -115.90  705.93
   7   3  1516565.38 2251.07
   7  -3  1518200.53 2838.70
  -7   3 -1518681.05 1882.13
  -7  -3 -1518785.08 1674.44
   7  -3  16 -314.08 1332.17
   7   3  16 -264.77 1457.73
  -7   3 -16 -694.27  865.21
  -7  -3 -16  438.89  720.89
   7   3  17 3033.26 1426.12
   7  -3  17 3272.82 1866.26
  -7   3 -17 3765.76 1215.17
  -7  -3 -17 2886.29 1069.43
   7  -3  18-2761.01 1482.98
  -7   3 -18  290.38  947.76
  -7  -3 -18 1097.25  829.20
  -7   5  19  536.74 1075.69
  -7  -5  19  567.72 1028.12
  -7  -5  18 1884.78 1036.68
  -7   5  18  897.34 1111.17
  -7   5  17 3713.49 1502.20
  -7  -5  1711035.03 1433.35
  -7   5  16  629.94  990.69
  -7  -5  16 -692.62  821.90
  -7   5  1514917.34 2015.71
  -7  -5  1515508.62 1661.23
  -7  -5  14 -586.74  812.27
  -7   5  14  434.48 1064.65
  -7   5  13 1588.47 1360.65
  -7  -5  13 1853.78  954.99
  -7  -5  12 3727.86 1065.53
  -7   5  12 4517.06 1495.42
  -7   5  11 5044.78 1698.48
  -7  -5  11 7008.63 1056.75
  -7   5  10 1855.11 1371.93
  -7  -5  10  588.87  756.51
  -7   5   9 1335.75 1259.49
  -7  -5   9 1011.53  656.05
  -7  -5   9  279.29  280.78
  -7   5   8 2045.53  816.82
  -7  -5   8 2691.73  976.35
  -7  -5   8 1036.37  344.35
   7  -5  -7  914.96 1627.72
  -7  -5   7 1298.34  339.39
  -7  -5   7 1485.37  655.47
   7  -5  -617597.43 2395.25
  -7   5   615662.30  870.43
  -7  -5   621081.43 1015.19
  -7  -5   618491.41 1417.38
   7  -5  -520158.78 2160.69
  -7   5   517964.58 1020.56
  -7  -5   520359.11 1659.75
  -7  -5   517801.48  896.86
   7  -5  -4 2097.80  612.67
  -7   5   4  535.14  404.51
  -7  -5   4  783.46  389.78
  -7  -5   4 1182.79  749.07
   7  -5  -340423.07 3001.92
  -7   5   342307.53 1954.81
  -7  -5   339624.65 2124.09
  -7  -5   337878.15 1771.70
   7  -5  -2 1721.48 1056.59
  -7   5   2 2959.76  614.63
  -7  -5   2 3957.11  721.95
  -7  -5   2 1584.71  690.84
   7  -5  -1 2027.37  890.59
  -7   5   1 1480.93  550.11
  -7  -5   1 1789.53  474.23
  -7  -5   1  952.75  343.25
   7   5   0 -868.08  900.18
   7  -5   0  324.14  789.15
  -7   5   0  632.22  525.79
  -7  -5   0  571.18  432.29
   7  -5   1  298.85  715.94
   7   5   1  222.05  600.35
  -7   5  -1  277.71  537.22
  -7  -5  -1  -94.45  421.44
   7   5   210797.62  925.89
   7  -5   213347.37 1485.52
  -7   5  -213707.01 1257.30
  -7  -5  -215060.08 1075.24
   7  -5   3 3513.16 1081.42
   7   5   3 4214.10  762.98
  -7   5  -3 3680.47  851.74
  -7  -5  -3 5088.77  669.92
   7  -5   4  381.95  832.58
   7   5   4 1211.46  391.39
  -7   5  -4  242.01  696.80
  -7  -5  -4  161.07  510.15
   7  -5   542802.95 2237.64
   7   5   546877.87 2467.52
  -7   5  -544535.92 2715.90
  -7  -5  -544004.03 2358.67
   7   5   6  -58.04  393.18
   7  -5   6  638.89  858.45
  -7   5  -6 -594.14  674.56
  -7  -5  -6  391.73  299.56
   7  -5   7 1671.19 1118.97
   7   5   7  390.25  471.76
  -7   5  -7 1547.81  822.39
  -7  -5  -7 1374.82  625.08
   7   5   826632.17 1958.03
   7  -5   831155.89 3350.71
  -7   5  -831344.47 2563.89
  -7  -5  -831033.24 2122.63
   7  -5   992034.81 6939.57
   7   5   989178.79 4950.10
  -7   5  -988929.71 5447.84
  -7  -5  -987616.04 4727.76
   7  -5  10 1111.25 1527.79
   7   5  10 1818.32 1035.72
  -7   5 -10 1182.40  942.99
  -7  -5 -10 1187.72  693.03
   7  -5  11 1063.96 1370.37
   7   5  11 -316.12  727.66
  -7   5 -11  699.82  862.83
  -7  -5 -11  764.53  628.60
   7   5  12 -336.32  784.43
   7  -5  12  249.55 1395.86
  -7   5 -12  -67.76  824.76
  -7  -5 -12 -113.04  613.93
   7  -5  1310591.75 2519.36
  -7   5 -1310917.09 1584.94
  -7  -5 -1311225.10 1211.43
   7  -5  14 2519.49 1906.66
  -7   5 -14 2600.28 1298.34
  -7  -5 -14 3802.13  991.67
   7  -5  15   -8.34  826.31
  -7   5 -15 1272.63  988.04
  -7  -5 -15  387.41  718.47
   7  -5  16 -197.89 1521.14
  -7   5 -16  263.99  996.32
  -7  -5 -16  996.28  764.12
   7  -5  17 7450.37 2781.37
  -7   5 -1714096.20 1958.46
  -7  -5 -1715620.71 1567.75
  -7  -7  18 2024.34 1039.21
  -7   7  18  427.74 1170.49
  -7   7  17 2900.97 1210.17
  -7  -7  17  725.84 1004.11
  -7  -7  16 5323.76 1221.21
  -7   7  16 3734.33 1595.30
  -7   7  15 5850.27 1560.99
  -7  -7  15 3130.07 1063.51
  -7  -7  14 4188.12 1079.81
  -7   7  14 6975.35 1817.34
  -7   7  13  818.61 1207.07
  -7  -7  13  129.76  689.32
  -7   7  1220682.44 2687.47
  -7  -7  1220449.82 1798.47
  -7   7  11 1421.29 1441.69
  -7  -7  11 1587.80  998.69
  -7  -7  10 3487.80 1287.95
  -7  -7  10 6829.48  650.96
  -7   7  10 4944.94 1967.07
  -7   7   9 2359.11 1859.65
  -7  -7   9 6516.16  610.98
  -7  -7   9 3652.09 1139.28
   7  -7  -8 2248.01 1681.82
  -7  -7   8 -605.97  637.89
  -7  -7   8  153.41  343.03
   7  -7  -7 6230.35 2263.44
  -7  -7   7 6351.63  618.54
  -7  -7   7 6965.77  964.76
   7  -7  -6 4200.16 1521.50
  -7  -7   6 2232.94  502.65
  -7  -7   6 2148.64  745.44
   7  -7  -513135.43 1896.46
  -7  -7   510203.01  801.99
  -7  -7   510781.28  846.84
  -7   7   510539.32  752.66
   7  -7  -4  745.63 1139.56
  -7   7   4 1656.16  668.26
  -7  -7   4  458.94  599.37
  -7  -7   4 1923.63  548.45
   7  -7  -315494.72 1977.46
  -7   7   317382.17 1467.91
  -7  -7   316826.35 1149.36
  -7  -7   316474.45 1093.93
   7  -7  -2 1160.65 1096.30
  -7   7   2 3201.99  936.62
  -7  -7   2 2581.19  603.10
  -7  -7   2 1680.57  578.66
   7  -7  -145969.68 3125.81
  -7   7   146786.56 3048.99
  -7  -7   144294.69 2260.48
  -7  -7   141981.83 2094.56
   7  -7   045359.73 3564.31
  -7   7   048356.67 3138.70
  -7  -7   056814.43 3087.54
   7  -7   1  501.06  876.72
  -7   7  -1  999.24  726.89
  -7  -7  -1  924.39  537.51
   7  -7   2 3738.17 1118.19
  -7  -7  -2 2694.83  707.72
  -7   7  -2 5259.48  982.90
   7  -7   3 7893.87 1429.30
  -7   7  -3 9740.42 1296.38
  -7  -7  -3 9983.15  928.85
   7  -7   4 5221.44 1284.54
  -7   7  -4 6178.56 1258.19
  -7  -7  -4 7923.02  874.10
   7  -7   5 2315.84 1079.44
  -7   7  -5 1560.61 1003.31
  -7  -7  -5 2488.14  649.39
   7  -7   615268.92 1913.96
  -7   7  -616286.34 1835.85
  -7  -7  -615983.13 1279.97
   7  -7   7 -723.39  986.45
  -7   7  -7  337.58  890.04
  -7  -7  -7 -412.52  535.34
   7  -7   8  851.38  632.35
  -7   7  -8 1574.46  916.74
  -7  -7  -8 -337.23  558.79
   7  -7   9 8253.92 1816.68
  -7   7  -9 3233.70 1412.19
  -7  -7  -9 8380.16  924.44
   7  -7  10 3294.90 1290.97
  -7  -7 -10  473.39  636.24
  -7   7 -10 -281.01  988.13
   7  -7  11 2742.48 1347.44
  -7   7 -11  197.01 1019.71
  -7  -7 -11  839.06  656.84
   7  -7  12 -487.62 1455.77
  -7   7 -12 3614.39 1094.63
  -7  -7 -12 1429.31  681.30
   7  -7  13 2557.22  849.47
  -7   7 -13 1087.68 1087.63
  -7  -7 -13  718.40  726.72
   7  -7  14 6371.17 1792.74
  -7  -7 -14 2781.29  949.14
  -7   7 -14 4199.20 1354.35
   7  -7  15 5504.65 1917.82
  -7   7 -15 5811.15 1430.28
  -7  -7 -15 3654.85  961.81
   7  -7  16 1956.07 1527.93
  -7   7 -16  795.49 1129.65
  -7  -7 -16  160.19  712.83
  -7  -9  17  132.27  920.33
  -7   9  17  916.44 1288.08
  -7   9  16 1950.12 1394.46
  -7  -9  16  970.16  971.05
  -7   9  15 3121.47 1306.56
  -7  -9  15 -100.20  846.66
  -7   9  14 -118.31 1282.20
  -7  -9  14  302.31  730.44
  -7  -9  1315901.64 1453.22
  -7   9  1316329.62 2371.92
  -7   9  12 1144.18 1408.85
  -7  -9  12  712.03  689.87
  -7  -9  11 2234.27  723.25
  -7   9  11 3342.25 1571.95
  -7   9  10 1566.60 1745.76
  -7  -9  10 3309.44  623.89
  -7  -9  10 2638.24  725.17
  -7  -9   944537.19 2680.42
  -7   9   945222.36 4354.04
  -7  -9   946975.30 2410.62
   7  -9  -8 3202.13 2316.90
  -7  -9   8 2471.93  679.34
   7  -9  -7 3695.48 1981.51
  -7  -9   7 2344.24  635.10
   7  -9  -6 6540.51 2228.40
  -7  -9   612961.87 1091.58
   7  -9  -520403.14 2589.71
  -7  -9   522961.01 1451.26
   7  -9  -4 3553.30 1602.28
  -7   9   4 5199.27  755.29
  -7  -9   4 6934.07  856.14
   7  -9  -3 2007.97 1257.03
  -7   9   3 2057.70  671.40
  -7  -9   3 2553.34  688.57
   7  -9  -224847.61 2680.66
  -7  -9   233739.46 2122.24
  -7   9   225369.69 2458.39
   7  -9  -118432.90 2050.50
  -7   9   117057.85 1534.80
  -7  -9   117697.56 1331.09
  -7   9   011844.11 1453.46
  -7  -9   014121.46 1221.16
   7  -9   1   10.17  480.73
  -7   9  -1  241.80  754.09
  -7  -9  -1  280.14  554.20
   7  -9   2 1189.67 1012.74
  -7  -9  -2 2286.16  714.33
  -7   9  -2 2073.90  981.70
   7  -9   3 1247.25 1025.47
  -7   9  -3 1329.82 1019.38
  -7  -9  -3 2298.61  677.83
   7  -9   4  392.32  953.90
  -7   9  -4  267.82  949.85
  -7  -9  -4  696.82  596.40
   7  -9   5  880.61  881.27
  -7   9  -5-1071.59  921.75
  -7  -9  -5  581.23  580.66
   7  -9   6  327.58  923.79
  -7   9  -6  -76.85  937.49
  -7  -9  -6 -634.34  556.03
   7  -9   7 1681.36 1042.57
  -7   9  -7  912.97  644.48
  -7  -9  -7 2014.08  647.23
   7  -9   8 1838.45 1213.33
  -7   9  -8  334.26 1185.77
  -7  -9  -8 2399.55  690.02
   7  -9   9  459.48 1075.89
  -7   9  -9 -153.08 1025.37
  -7  -9  -9  367.24  336.60
   7  -9  10 1114.48 1200.69
  -7  -9 -10  509.91  649.15
  -7   9 -10 1101.06 1106.79
   7  -9  11  736.04 1316.94
  -7   9 -11  326.98 1109.79
  -7  -9 -11 1353.38  677.00
   7  -9  12 3716.83 1526.73
  -7   9 -12  383.85 1231.75
  -7  -9 -12 2121.66  732.65
   7  -9  13 1005.68 1276.97
  -7   9 -13 1399.89 1103.36
  -7  -9 -13  322.75  660.76
   7  -9  14 1654.77 1328.65
  -7  -9 -14-1083.22  682.14
  -7   9 -14-1225.86 1093.23
   7  -9  15 1781.50 1694.34
  -7   9 -15 2512.36 1442.98
  -7  -9 -15 5213.72  979.99
  -7  11  15 6852.79 1839.88
  -7  11  14  767.96 1387.51
  -7  11  13 1136.66 1347.39
  -7  11  12 1432.43 1471.59
  -7 -11  11 1616.97  674.42
  -7  11  11 1695.87 1522.07
  -7  11  10 9255.90 2807.94
  -7 -11  1018856.60 1539.08
  -7 -11   915279.67 1374.58
  -7  11   918757.24 2762.25
   7 -11  -8 6371.18 3254.90
  -7 -11   813529.79 1330.29
   7 -11  -7 8465.79 2478.55
  -7 -11   7 6028.17  990.79
   7 -11  -6 -106.94 1365.07
  -7 -11   6 -420.89  655.37
   7 -11  -5 5660.27 1637.77
  -7 -11   5 4902.35  918.71
   7 -11  -4 6298.81 1798.88
  -7  11   4 8131.31 1403.83
  -7 -11   4 9901.38 1119.34
   7 -11  -3 2013.03 1216.68
  -7  11   3 1262.62  921.39
  -7 -11   3 1112.59  705.03
   7 -11  -222049.32 2577.64
  -7  11   223206.98 2472.42
  -7 -11   230714.25 2093.90
   7 -11  -1 1552.25 1140.36
  -7  11   1 1639.84  848.75
  -7 -11   1 2363.13  760.10
   7 -11   022888.24 2501.48
  -7  11   015767.46 2347.03
  -7 -11   024023.65 1775.67
   7 -11   1 4178.51 1257.70
  -7  11  -1 1730.85 1047.57
  -7 -11  -1 3315.90  800.51
   7 -11   2  618.02  864.48
  -7  11  -2  215.17  821.00
  -7 -11  -2 -729.32  579.49
   7 -11   313729.85 1686.23
  -7 -11  -313771.90 1276.62
  -7  11  -3 8913.00 1661.07
   7 -11   4  877.32 1003.97
  -7  11  -4  761.56  965.85
  -7 -11  -4  445.39  661.05
   7 -11   5 8816.39 1610.36
  -7  11  -5 8535.33 1639.63
  -7 -11  -511810.17 1129.37
   7 -11   616097.89 2203.38
  -7  11  -617269.11 2375.56
  -7 -11  -626861.57 1848.95
   7 -11   7  164.99  932.34
  -7  11  -7 1060.18  990.73
  -7 -11  -7   -7.05  586.72
   7 -11   8 3230.73 1151.96
  -7  11  -8 3159.28 1202.65
  -7 -11  -8 1434.88  740.61
   7 -11   9 2874.69 1170.94
  -7  11  -9 1718.54 1249.11
  -7 -11  -9 1717.63  721.23
   7 -11  10  870.98 1151.88
  -7  11 -10 1003.34  679.06
  -7 -11 -10  721.47  675.93
   7 -11  11 1615.79 1047.73
  -7 -11 -11  144.34  637.48
  -7  11 -11-1311.57 1055.73
   7 -11  12  662.06 1355.43
  -7  11 -12 1920.12 1295.11
  -7 -11 -12 2116.15  805.76
   7 -11  13  813.10 1264.21
  -7  11 -13 1912.36 1157.48
  -7 -11 -13  475.55  434.84
  -7  13  12  956.06 1388.97
  -7 -13  11 1182.38  826.05
  -7  13  11 -551.15 1327.66
  -7  13  10-4051.67 1485.32
  -7 -13  10   34.74  867.02
  -7 -13   9 2139.76  912.45
  -7  13   9  778.53 1696.39
   7 -13  -8 1256.22 1961.47
  -7 -13   8  184.36  778.30
   7 -13  -7 -321.36 1678.89
  -7 -13   7  -24.48  701.88
   7 -13  -6 2558.55 1908.53
  -7 -13   6 5084.52 1115.75
   7 -13  -5  842.21 1409.59
  -7 -13   5 1709.15  841.68
   7 -13  -4 6584.43 2522.81
  -7 -13   422185.85 1889.09
   7 -13  -3  607.03 1234.55
  -7  13   3  832.64  693.48
  -7 -13   3  948.90  786.60
   7 -13  -2  534.23  994.17
  -7 -13   2 -252.38  671.16
   7 -13  -1  930.01  990.20
  -7  13   1 -651.25  940.42
  -7 -13   1  181.50  681.63
   7 -13   0  -26.14 1021.26
  -7  13   0  606.19  772.75
  -7 -13   0  364.81  677.72
   7 -13   1 2921.41 1304.18
  -7  13  -1 4764.54 1116.97
  -7 -13  -1 4744.88  935.00
   7 -13   2 -499.74  907.29
  -7  13  -2  784.95  791.76
  -7 -13  -2 -202.25  610.51
   7 -13   3 1929.42 1078.89
  -7  13  -3 1008.99  996.57
  -7 -13  -3  831.78  717.37
   7 -13   4 3140.67 1264.18
  -7  13  -4 1608.69 1270.63
  -7 -13  -4 5053.95  947.68
   7 -13   5 5916.97 1688.01
  -7  13  -511648.62 1708.55
  -7 -13  -512202.47 1273.46
   7 -13   6 1712.17 1143.89
  -7  13  -6   65.82 1112.48
  -7 -13  -6 1374.43  762.51
   7 -13   7 1978.47 1139.41
  -7  13  -7  490.45 1212.36
  -7 -13  -7 2633.19  817.72
   7 -13   8 2023.60 1121.36
  -7  13  -8 2122.88 1238.13
  -7 -13  -8 1390.46  841.14
   7 -13   9 3189.65 1031.44
  -7  13  -9 2505.13 1156.47
  -7 -13  -9  176.48  455.77
   7 -13  10 1494.38 1053.14
  -7 -13 -10  222.56  774.12
  -7  13 -10 1053.31 1163.66
  -7  15   8 -647.17  920.20
  -7 -15   8 2431.44 1067.38
   7 -15  -7 7636.20 3188.15
  -7 -15   7 7544.67 1527.95
   7 -15  -6 4803.50 3301.13
  -7 -15   6 3667.41 1293.00
   7 -15  -5 1494.55 1624.80
  -7 -15   5  857.42 1012.04
   7 -15  -4 1243.96 1692.03
  -7 -15   4 5346.28 1235.44
   7 -15  -3 3942.67 1969.88
  -7 -15   3  890.29  998.07
   7 -15  -2 4123.03 1532.37
  -7  15   2 2259.36 1012.03
  -7 -15   2 5237.46 1207.35
   7 -15  -1  912.10 1207.22
  -7  15   1 -416.11  771.00
  -7 -15   1 1467.25  890.14
   7 -15   0 -819.23 1006.41
  -7  15   0  320.44  790.19
  -7 -15   0  144.10  748.47
   7 -15   1 3312.92 1380.78
  -7  15  -1 3436.36 1202.13
  -7 -15  -1 4085.26 1057.37
   7 -15   2 4904.03 1286.88
  -7  15  -2 2462.44 1088.65
  -7 -15  -2 1456.65  916.03
   7 -15   3-1822.04 1032.29
  -7  15  -3  828.44  889.48
  -7 -15  -3  766.26  678.86
   7 -15   4 -130.53 1003.93
  -7  15  -4  176.49  951.20
  -7 -15  -4  621.20  688.10
   7 -15   5 1602.45 1054.11
  -7  15  -5 -150.16 1019.72
  -7 -15  -5 1023.17  779.25
   7 -15   6  887.38 1068.40
  -7  15  -6 -328.59 1077.99
  -7 -15  -6 1397.24  822.65
   7 -15   7  377.56 1065.16
  -7  15  -7  507.83 1072.39
  -8   0  19 -182.45 1012.98
  -8   0  18  343.29 1025.53
  -8   0  17  681.33 1053.00
  -8   0  16 4553.36 1320.90
  -8   0  15  -92.89  952.58
  -8   0  14 1040.69 1115.17
  -8   0  13 1332.95 1138.55
  -8   0  1237864.57 3047.25
  -8   0  11  130.92 1075.33
  -8   0  10188221.512118.91
  -8   0   9  287.19 1040.57
  -8   0   887770.90 5694.32
  -8   0   7 -886.06 1166.10
  -8   0   6 2537.79  705.20
  -8   0   6 1554.24  329.42
   8   0  -5 2719.49 1419.65
  -8   0   5 -186.05  299.23
   8   0  -427112.12 2481.58
  -8   0   425178.68 1256.44
   8   0  -3-1210.12  857.56
  -8   0   3  187.46  406.07
   8   0  -2266131.817179.45
  -8   0   2279382.915184.79
   8   0  -1 1295.24  784.24
  -8   0   1  -89.73  363.47
   8   0   043094.41 2765.41
  -8   0   041749.64 1954.41
   8   0   1 -897.47  675.55
  -8   0  -1   54.94  433.93
   8   0   2  760.91  689.13
  -8   0  -2  151.24  464.81
   8   0   3   35.60  635.10
  -8   0  -3  106.19  477.49
   8   0   4 2101.47  819.38
  -8   0  -4 2042.54  652.92
   8   0   5  327.36  716.55
  -8   0  -5   -6.99  542.43
   8   0   662177.86 3739.29
  -8   0  -662276.47 3380.50
   8   0   7    5.26  699.60
  -8   0  -7  -28.52  595.13
   8   0   886676.87 5418.63
  -8   0  -883961.96 4813.65
   8   0   9  547.59 1005.73
  -8   0  -9  394.02  669.77
   8   0  1010387.09 1787.81
  -8   0 -1010978.71 1267.91
   8   0  11-1342.34 1034.47
  -8   0 -11  658.83  676.63
   8   0  12 3168.81 1412.42
  -8   0 -12 2072.27  933.64
   8   0  13 -429.39 1132.45
  -8   0 -13 -236.40  760.11
   8   0  1411633.84 2281.02
  -8   0 -1419472.90 1798.44
   8   0  15  980.29 1309.80
  -8   0 -15  467.85  826.05
   8   0  16 8839.05 2189.82
  -8   0 -1610800.61 1462.40
   8   0  17-1746.55 1341.50
  -8   0 -17  186.17  954.60
  -8   2  19  504.50  587.63
  -8  -2  19 1056.40 1136.47
  -8   2  18   65.13  994.45
  -8  -2  18 1431.37 1112.52
  -8   2  17 1102.93 1022.07
  -8  -2  17  725.58 1081.87
  -8   2  16 -135.85  875.73
  -8  -2  16  438.61  917.86
  -8   2  15  -19.40  989.60
  -8  -2  15 -596.12  951.92
  -8   2  1425509.84 2556.14
  -8  -2  1428957.10 2441.25
  -8   2  13 2869.65 1268.66
  -8  -2  13 1313.36 1104.06
  -8   2  1230429.02 2870.35
  -8  -2  1228306.71 2542.41
  -8   2  11 1067.34 1252.36
  -8  -2  11 2813.33 1186.76
  -8   2  1042178.06 3620.46
  -8  -2  1046122.32 3184.36
  -8   2   9 2960.90 1446.77
  -8  -2   9 1355.07 1172.30
  -8   2   821787.55 2529.78
  -8  -2   820258.87 2002.22
  -8  -2   7  980.64  985.95
  -8   2   7  686.42  748.24
  -8  -2   7  940.70  313.77
   8  -2  -6 5958.98 2052.48
  -8  -2   6 6369.84  512.66
  -8  -2   6 7126.64 1422.77
   8  -2  -5 1120.29 1263.20
  -8   2   5 1246.53  282.63
  -8  -2   5  117.66 1005.85
  -8  -2   5  720.39  393.56
   8  -2  -421793.95 2306.65
   8   2  -419118.36 2846.39
  -8   2   422085.15 1191.74
  -8  -2   422468.57  992.47
   8   2  -3 2984.49 1537.39
   8  -2  -3 2603.33 1247.07
  -8   2   3 2402.42  662.64
  -8  -2   3 5019.06  487.36
   8  -2  -226285.01 2155.81
   8   2  -221670.67 2745.91
  -8   2   222310.73 1112.56
  -8  -2   221085.96 1075.13
   8   2  -1  175.06  855.88
   8  -2  -1 1234.88  902.73
  -8   2   1 1202.78  608.58
  -8  -2   1 1131.76  434.62
   8  -2   025903.45 2054.09
   8   2   026947.28 2357.58
  -8   2   026019.11 1383.91
  -8  -2   024153.25 1263.12
   8   2   1 1977.25  762.47
   8  -2   1 1530.23  868.09
  -8   2  -1 1345.01  550.28
  -8  -2  -1 1202.96  500.50
   8  -2   225314.72 1902.41
   8   2   224118.65 1624.83
  -8   2  -224552.24 1486.97
  -8  -2  -222653.81 1339.02
   8  -2   3  818.41  762.18
   8   2   3  110.08  634.74
  -8   2  -3  341.96  571.65
  -8  -2  -3  844.65  506.57
   8  -2   423850.77 2058.14
   8   2   426889.72 1781.47
  -8   2  -426980.93 1717.65
  -8  -2  -427685.22 1627.57
   8   2   5 3872.51  896.89
   8  -2   5 2039.50 1102.25
  -8   2  -5 3025.03  890.99
  -8  -2  -5 6748.93  816.14
   8  -2   6  125.34  827.42
   8   2   6  295.46  621.52
  -8   2  -6  171.08  647.76
  -8  -2  -6  839.66  601.61
   8  -2   7  187.61  809.18
   8   2   7  298.37  645.37
  -8   2  -7  106.11  644.16
  -8  -2  -7  218.50  577.71
   8  -2   8 -294.14  959.46
   8   2   8 -540.65  945.99
  -8   2  -8  -31.67  685.97
  -8  -2  -8 -503.37  621.52
   8  -2   9  657.86  980.59
   8   2   9  306.71  728.63
  -8   2  -9  184.67  667.74
  -8  -2  -9 -517.15  614.92
   8  -2  10  989.11 1228.87
   8   2  10 1448.99  930.93
  -8   2 -10 1039.18  814.44
  -8  -2 -10  785.20  736.94
   8   2  11  970.23 1027.35
   8  -2  11 2747.49 1348.62
  -8   2 -11  156.57  877.39
  -8  -2 -11 1662.22  777.86
   8  -2  12 3703.03 1549.89
   8   2  12 3104.48 1293.76
  -8   2 -12 5095.50 1138.71
  -8  -2 -12 3699.02  949.12
   8   2  13 -444.97  968.77
   8  -2  13  323.11 1172.62
  -8   2 -13-1161.65  778.19
  -8  -2 -13  600.40  687.75
   8  -2  14  987.36 1371.01
   8   2  14  967.12 1136.72
  -8   2 -14  857.68  935.02
  -8  -2 -14  528.60  810.25
   8  -2  15 1112.74 1331.23
   8   2  15 1311.30 1140.78
  -8   2 -15  163.34  855.47
  -8  -2 -15 -184.09  805.61
   8  -2  1613571.41 3507.95
   8   2  16 9431.97 2223.47
  -8   2 -1614637.57 1782.72
  -8  -2 -1616186.00 1695.44
   8   2  17 2859.79 1703.43
   8  -2  17 2110.40 1938.42
  -8   2 -17 4940.24 1322.83
  -8  -2 -17 4473.17 1236.89
  -8   4  1813807.01 1928.97
  -8  -4  1817448.35 2000.25
  -8   4  17-1156.16 1007.92
  -8  -4  17 -432.97  959.22
  -8   4  16 7476.63 1656.57
  -8  -4  16 7121.36 1454.50
  -8   4  15 3040.59 1244.88
  -8  -4  15  -57.77 1019.24
  -8   4  14 8653.26 1757.64
  -8  -4  14 8652.92 1451.66
  -8   4  13  -91.10 1135.09
  -8  -4  13 -186.11  857.89
  -8   4  12  234.32 1181.46
  -8  -4  12 1180.04  901.61
  -8   4  11 1498.33  793.37
  -8  -4  11  297.65  883.92
  -8   4  10 1188.45 1258.78
  -8  -4  10 -204.04  822.38
  -8   4   922002.55 2936.10
  -8  -4   921167.56 2056.45
  -8   4   833718.77 2396.23
  -8  -4   833235.50 2363.40
   8  -4  -7 5229.70 2679.78
  -8  -4   7 7334.96  645.49
  -8  -4   7 5160.93 1178.41
   8  -4  -6   -9.19 1453.95
  -8  -4   6  101.91  262.67
  -8  -4   6  785.80  661.06
   8  -4  -5  201.52 1140.05
  -8   4   5  127.68  389.03
  -8  -4   5  -76.02  382.78
  -8  -4   5  552.74  881.63
   8  -4  -4 5125.08 1580.79
  -8   4   4 6568.48  806.90
  -8  -4   4 7944.89 1455.00
  -8  -4   4 6600.94  739.50
   8  -4  -3 2494.48 1211.79
  -8   4   3  631.79  510.25
  -8  -4   3 2214.05  484.30
  -8  -4   3 5062.95  852.09
   8  -4  -223274.62 2238.85
   8   4  -223504.72 2483.59
  -8   4   223655.74 1581.46
  -8  -4   222483.97 1165.35
   8  -4  -1 2200.20 1181.75
   8   4  -1 2845.11 1670.13
  -8   4   1 2423.06  658.27
  -8  -4   1 4751.42  576.75
   8  -4   0 -423.34  846.83
   8   4   0   20.31  617.99
  -8   4   0  827.77  497.61
  -8  -4   0  267.96  410.80
   8  -4   1  229.94  760.52
   8   4   1   63.21  526.70
  -8   4  -1 -335.48  489.32
  -8  -4  -1  142.18  398.21
   8  -4   2 1138.23  868.79
   8   4   2  885.46  858.69
  -8   4  -2  771.76  628.81
  -8  -4  -2 1093.52  525.03
   8   4   3  -11.01  691.03
   8  -4   3 -580.97  765.17
  -8   4  -3  419.24  546.42
  -8  -4  -3  356.44  477.22
   8  -4   4 2065.99 1085.25
   8   4   4 2748.77  641.70
  -8   4  -4 2581.62  784.87
  -8  -4  -4 3227.75  676.45
   8  -4   5 -132.60  475.03
   8   4   5 -750.36  693.15
  -8   4  -5 -944.01  656.19
  -8  -4  -5  -78.69  547.13
   8  -4   621304.15 2052.69
   8   4   619614.05 1328.52
  -8   4  -619885.19 1674.75
  -8  -4  -618912.96 1397.59
   8   4   7 3393.39  835.05
   8  -4   7 3965.95 1267.21
  -8   4  -7 4428.85 1107.90
   8  -4   8  550.25 1139.66
   8   4   8 1623.16  633.37
  -8   4  -8 1347.54  884.36
  -8  -4  -8 1732.56  716.14
   8  -4   9   59.63 1074.11
   8   4   9  670.74  804.64
  -8   4  -9  694.55  770.58
  -8  -4  -9  383.24  643.29
   8  -4  10 4297.91 1515.27
   8   4  10 3948.84  901.53
  -8   4 -10 3336.98 1057.84
  -8  -4 -10 4409.60  862.41
   8  -4  11 1591.62 1437.27
   8   4  11 1373.83  854.73
  -8   4 -11 1778.12  983.96
  -8  -4 -11 2125.29  501.38
   8  -4  12 2793.17 1783.16
   8   4  12 4933.82 1106.27
  -8   4 -12 6228.81 1211.72
  -8  -4 -12 5376.53 1004.48
   8  -4  13 1546.30 1475.65
  -8   4 -13 1793.45 1001.48
  -8  -4 -13 1271.78  819.46
   8  -4  14 2212.34 1308.92
  -8   4 -14  614.13  908.71
  -8  -4 -14   10.84  724.34
   8  -4  15 2708.34 1813.93
  -8   4 -15 4984.31 1292.31
  -8  -4 -15 3653.58 1048.13
   8  -4  16 5662.76 2093.92
  -8   4 -16 8002.70 1591.46
  -8  -4 -16 6793.52 1263.33
  -8   6  17   20.60 1321.42
  -8  -6  17 1542.82 1011.55
  -8   6  16 7836.35 1673.66
  -8  -6  16 2790.90 1228.74
  -8   6  15 2345.74 1353.09
  -8  -6  15  847.38  904.60
  -8   6  14 1348.88 1437.82
  -8  -6  14 1653.72  902.94
  -8   6  13 7910.31 1801.08
  -8  -6  13 6435.66 1288.54
  -8   6  1216366.99 2299.50
  -8   6  11 2436.40 1554.62
  -8  -6  11 2843.52  889.88
  -8   6  10   98.92 1377.54
  -8  -6  10 -777.00  708.98
  -8  -6   9 -805.67  856.83
  -8   6   9 1276.64 1319.42
   8  -6  -8 2571.42 1837.88
  -8  -6   8  473.21  444.85
  -8  -6   8  -50.58  591.90
   8  -6  -716104.84 2928.57
  -8  -6   712660.86 1134.91
  -8  -6   712699.84 1054.87
   8  -6  -6 -676.01 1331.69
  -8  -6   6  676.67  374.25
  -8  -6   6 -128.11  755.16
   8  -6  -5 2947.11 1495.40
  -8  -6   5 5897.78  623.41
  -8  -6   5 2559.91  769.25
   8  -6  -4 1251.37  697.14
  -8   6   4 1565.19  662.08
  -8  -6   4 1047.40  481.81
  -8  -6   4 1394.22  629.16
   8  -6  -3 1272.13 1089.12
  -8  -6   3  698.91  471.91
  -8  -6   3  703.30  731.31
  -8   6   3  911.93  552.42
   8  -6  -213145.62 1670.77
  -8   6   213123.61 1124.92
  -8  -6   212651.57  959.87
  -8  -6   211735.28 1026.20
   8  -6  -1  337.75  858.11
  -8   6   1  -77.24  767.14
  -8  -6   1   51.97  427.49
  -8  -6   1   89.86  483.59
   8  -6   0 5563.34 1380.54
  -8   6   0 9811.87 1076.84
  -8  -6   0 6961.55  846.33
  -8  -6   010728.45  867.95
   8  -6   1 2875.07 1130.87
   8   6   1 3775.24 1141.17
  -8   6  -1 2084.71  837.32
  -8  -6  -1 2565.27  659.62
   8  -6   2 4191.89 1160.09
   8   6   2 1471.55  952.38
  -8   6  -2 4385.85 1270.58
  -8  -6  -2 4504.50  696.17
   8  -6   3  103.33  831.09
   8   6   3  378.36  604.15
  -8   6  -3  221.66  711.44
  -8  -6  -3   93.16  507.30
   8  -6   411164.16 1561.25
   8   6   4 7512.87 1043.16
  -8   6  -411176.71 1343.55
  -8  -6  -4 9446.60  961.02
   8  -6   5 4676.06 1469.00
  -8   6  -510456.94 1407.60
  -8  -6  -511535.86 1088.99
   8  -6   6 2795.45  706.20
  -8  -6  -6 4436.97  794.03
  -8   6  -6 3812.23 1100.47
   8  -6   7 1054.00  951.40
  -8   6  -7   90.17  886.94
  -8  -6  -7  703.41  622.59
   8  -6   8 6057.00 1573.94
  -8   6  -810384.92 1433.76
  -8  -6  -8 9344.74 1021.95
   8  -6   9 -956.50 1087.75
  -8   6  -9 -199.52  887.69
  -8  -6  -9 -454.09  578.26
   8  -6  10  -12.01 1029.78
  -8  -6 -10  233.81  553.26
  -8   6 -10 -423.85  816.04
   8  -6  11 1475.38  720.09
  -8   6 -11  734.93  948.32
  -8  -6 -11   67.70  641.75
   8  -6  12 6715.52 1777.98
  -8   6 -12 4090.77 1347.48
  -8  -6 -12 7945.19 1015.12
   8  -6  13-1412.25 1245.91
  -8   6 -13  832.38  883.17
  -8  -6 -13  251.18  630.20
   8  -6  14 3898.78 1542.56
  -8  -6 -14 2773.13  859.57
  -8   6 -14 2141.25 1181.13
   8  -6  15 4415.94 1784.58
  -8   6 -15 4002.42 1350.03
  -8  -6 -15 3034.06 1056.62
  -8   8  16 1145.52 1491.36
  -8  -8  16 1826.36  989.39
  -8   8  15 3815.06 1461.05
  -8  -8  15 1691.90 1383.22
  -8   8  14 3253.71  965.74
  -8  -8  14 2516.86  983.22
  -8   8  13 4179.43 1561.49
  -8  -8  13 2238.80  913.52
  -8   8  1211046.34 2341.09
  -8  -8  1213242.67 1289.91
  -8   8  11 6674.83 2344.00
  -8  -8  11 9275.20 1090.32
  -8   8  10 1021.11 1445.61
  -8  -8  10  320.04  793.59
  -8   8   9 1857.17  893.22
  -8  -8   9  342.24  807.86
  -8  -8   9 1013.89  448.98
   8  -8  -812806.45 2102.17
  -8  -8   816230.23 1034.03
   8  -8  -7 -967.87 1693.18
  -8  -8   7 -481.80  598.06
   8  -8  -6 8091.71 2411.53
  -8  -8   614031.61 1026.52
   8  -8  -5  844.00 1347.08
  -8  -8   5 1832.71  596.47
   8  -8  -417985.15 2199.36
  -8  -8   416154.22 1170.94
   8  -8  -3 3627.18 1375.20
  -8  -8   3 2745.01  693.88
  -8   8   3 2506.15  749.31
   8  -8  -2 1421.25 1141.47
  -8   8   2  983.43  733.67
  -8  -8   2 2122.64  639.05
   8  -8  -168368.20 5280.16
  -8   8   167331.19 4601.17
  -8  -8   185314.65 4815.32
   8  -8   0 -384.60 1563.39
  -8   8   0 8292.77 1186.62
  -8  -8   0 9450.13  943.45
   8  -8   1  -69.82 1175.16
  -8  -8  -1 3881.35  735.95
  -8   8  -1 2704.60 1339.49
   8  -8   2  273.09  846.26
  -8   8  -2 -185.07  779.39
  -8  -8  -2  192.55  535.59
   8  -8   3  220.50  787.51
  -8   8  -3 -389.71  777.26
  -8  -8  -3  123.19  515.35
   8  -8   4 -495.82  915.34
  -8   8  -4 -522.61  816.69
  -8  -8  -4  -33.98  566.02
   8  -8   513128.10 1306.70
  -8  -8  -515159.33 1382.51
  -8   8  -515568.54 1839.51
   8  -8   6  682.31  950.12
  -8   8  -6  -59.23  902.30
  -8  -8  -6  456.62  580.52
   8  -8   7 2021.47 1311.01
  -8   8  -7 3752.04 1340.56
  -8  -8  -7 7404.64  917.60
   8  -8   8 1755.87 1117.40
  -8   8  -8 3193.88 1150.93
  -8  -8  -8 1564.56  718.48
   8  -8   9  308.37 1049.54
  -8  -8  -9 1492.41  639.63
  -8   8  -9 -354.93 1043.07
   8  -8  10 2852.33 1375.78
  -8   8 -10 5210.90 1293.57
  -8  -8 -10 3005.99  784.24
   8  -8  11 1686.65 1165.62
  -8   8 -11 1134.74 1089.45
  -8  -8 -11  898.01  682.51
   8  -8  12  734.36 1226.21
  -8   8 -12 1628.49 1086.91
  -8  -8 -12  594.87  675.25
   8  -8  13 2827.09 1416.62
  -8   8 -13 2505.73 1222.19
  -8  -8 -13 1049.48  788.20
   8  -8  14 -170.03 1167.21
  -8   8 -14 -253.89 1000.49
  -8  -8 -14  387.26  661.48
  -8  10  15 1696.91 1598.06
  -8  10  14 -284.69 1190.28
  -8  10  13 1447.80 1326.87
  -8  10  12 -993.06 1408.43
  -8  10  11 2170.15 1023.61
  -8  10  1010834.35 2437.85
  -8  10   9 1559.67 1048.08
  -8 -10   9 2634.67  893.42
   8 -10  -8 4645.76 2195.74
  -8 -10   8  918.77  605.04
   8 -10  -7 2403.39 1925.45
  -8 -10   7 1227.79  632.74
   8 -10  -6 1331.88 1583.70
  -8 -10   6 1214.54  882.70
   8 -10  -5  226.92 1361.58
  -8 -10   5 1527.88  668.46
   8 -10  -4 1477.55 1390.40
  -8 -10   4 2391.99  720.14
   8 -10  -323805.36 2684.14
  -8  10   319129.85 2161.89
  -8 -10   328062.40 1996.61
   8 -10  -2  150.87 1193.24
  -8 -10   2 2232.62  698.77
  -8  10   2 1730.67 1085.31
   8 -10  -119128.46 2389.56
  -8  10   115665.56 1770.75
  -8 -10   123185.79 1753.15
   8 -10   0-1220.31 1047.20
  -8  10   0  424.06 1064.97
  -8 -10   0 1061.38  646.60
   8 -10   1 -704.20 1285.10
  -8  10  -1 2638.73 1093.13
  -8 -10  -1 5898.48  901.22
   8 -10   2 -398.64  878.45
  -8  10  -2 -777.54  792.90
  -8 -10  -2  440.40  595.51
   8 -10   3  332.91  961.41
  -8  10  -3  366.52  891.34
  -8 -10  -3  601.00  636.97
   8 -10   4 -554.66  942.10
  -8  10  -4  405.09  955.80
  -8 -10  -4 1018.36  632.94
   8 -10   5 -726.61  573.90
  -8  10  -5  782.61  985.40
  -8 -10  -5 -870.74  634.66
   8 -10   6  272.26 1009.94
  -8  10  -6 -674.48  982.02
  -8 -10  -6 -428.62  618.34
   8 -10   7 -123.41  945.42
  -8  10  -7-1023.40 1020.10
  -8 -10  -7 1180.43  645.13
   8 -10   8  975.43  990.14
  -8  10  -8 1406.20 1007.11
  -8 -10  -8 -251.63  616.26
   8 -10   911267.21 1766.45
  -8 -10  -911677.08 1320.19
  -8  10  -9 7527.80 1932.73
   8 -10  10  346.96 1202.97
  -8  10 -10 3074.71 1294.14
  -8 -10 -10 2759.81  819.95
   8 -10  11 -635.12 1027.67
  -8  10 -11 1008.96 1058.81
  -8 -10 -11  572.63  658.30
   8 -10  12 1325.93 1270.20
  -8  10 -12  -70.78 1213.47
  -8 -10 -12 2164.10  778.27
  -8  12  12  174.18 1199.54
  -8  12  11 3424.42 1844.96
  -8  12  10 1264.87 1627.09
  -8  12   9-2535.22  876.54
  -8 -12   9  604.92  657.92
   8 -12  -8 2325.24 2329.94
  -8 -12   8 1343.49  767.83
   8 -12  -7 8609.80 2797.41
  -8 -12   7 9086.23 1209.35
   8 -12  -6 3346.61 1890.85
  -8 -12   6 3781.46  922.91
   8 -12  -5 5755.81 1778.20
  -8 -12   5 4036.88  999.79
   8 -12  -4  658.03 1371.93
  -8 -12   4 1504.43  786.42
   8 -12  -3 5901.60 1941.24
  -8 -12   3 9629.15 1211.56
   8 -12  -2  850.56 1167.53
  -8  12   2 -265.25  675.10
  -8 -12   2 1025.82  678.07
   8 -12  -1  555.87 1276.25
  -8  12   1 1769.92  848.19
  -8 -12   1 2292.33  814.29
   8 -12   0  600.26  995.57
  -8  12   0  689.72 1026.21
  -8 -12   0 -352.13  382.34
   8 -12   1  388.24 1047.88
  -8  12  -1  415.15  823.81
  -8 -12  -1   88.08  661.72
   8 -12   2  633.75  951.06
  -8  12  -2 -530.92  828.71
  -8 -12  -2 -105.63  637.24
   8 -12   3 2290.68 1088.72
  -8 -12  -3  202.85  726.02
  -8  12  -3 1996.48 1003.12
   8 -12   4 1361.88  986.73
  -8  12  -4  172.59  999.19
  -8 -12  -4  513.53  685.61
   8 -12   5  -48.73  934.41
  -8  12  -5-1157.71  974.17
  -8 -12  -5  -47.75  663.40
   8 -12   6 2149.74 1284.12
  -8  12  -6 4303.51 1292.67
  -8 -12  -6 3139.05  862.81
   8 -12   7 1191.31 1162.51
  -8  12  -7  836.59 1216.76
  -8 -12  -7 1524.10  465.17
   8 -12   8 3386.83 1399.32
  -8  12  -8 5424.83 1497.13
  -8 -12  -8 5611.42  957.26
   8 -12   9 1550.69 1010.25
  -8  12  -9  615.31 1084.17
  -8 -12  -9 -320.57  673.40
   8 -12  10 1635.77 1262.83
  -8  12 -10 3031.13 1399.00
  -8 -12 -10 3519.70  945.95
  -8  14   9 1567.48 1722.54
  -8 -14   9 1874.31 1316.51
   8 -14  -8 1691.82 2384.04
  -8 -14   8  782.17  878.14
   8 -14  -7   55.96 2086.03
  -8 -14   7 1541.04  927.43
   8 -14  -6 2293.50 2143.58
  -8 -14   6 6358.06 1207.73
   8 -14  -5 5922.68 2385.22
  -8 -14   5 8229.06 1345.94
   8 -14  -4 5293.95 1834.18
  -8 -14   4 5052.61 1147.64
   8 -14  -3 3202.94 1421.73
  -8 -14   3  710.32  850.71
   8 -14  -2 1716.90 1550.43
  -8 -14   2 4731.41 1015.36
   8 -14  -1  201.15 1349.53
  -8 -14   1 1820.08  844.51
   8 -14   0   24.18 1223.59
  -8 -14   0 1403.18  807.33
  -8  14   0  822.82  868.40
   8 -14   1  179.41 1149.49
  -8 -14  -1  222.23  752.20
  -8  14  -1 1560.83  873.96
   8 -14   2  298.72 1094.15
  -8 -14  -2  -90.25  766.51
  -8  14  -2 1935.16  918.65
   8 -14   3 1405.32 1180.97
  -8 -14  -3  810.06  488.65
  -8  14  -3 2438.77 1047.03
   8 -14   4 6126.36 1578.89
  -8 -14  -4 8504.67  788.32
  -8  14  -4 5214.97 1485.12
   8 -14   5 1167.14 1110.42
  -8 -14  -5  416.06  753.99
  -8  14  -5  241.63 1036.56
   8 -14   6  240.75  980.26
  -8 -14  -6 -315.24  676.54
  -8  14  -6 1509.05 1033.32
  -9   1  18   39.61 1219.94
  -9  -1  18 1668.60 1225.32
  -9   1  1716350.57 2199.98
  -9  -1  1718178.71 2225.33
  -9   1  16 2212.38 1356.76
  -9  -1  16 3610.91 1365.20
  -9   1  1518504.84 2306.42
  -9  -1  1519715.75 2151.11
  -9  -1  14 3155.61 1258.28
  -9   1  14 1680.77 1420.75
  -9   1  1318103.41 2225.67
  -9  -1  1316736.78 2116.18
  -9   1  12 2623.44 1466.89
  -9  -1  12 1628.53 1266.03
  -9   1  1191349.16 6469.93
  -9  -1  11103378.9 6921.41
  -9   1  10 -159.55 1315.45
  -9  -1  10 2366.33 1249.76
  -9   1   913328.34 2051.81
  -9  -1   914554.68 1967.16
  -9   1   8 8707.05 2056.07
  -9   1   7 8559.67 1915.22
  -9  -1   710597.21 1865.01
   9  -1  -6 -159.19 1656.42
  -9  -1   6  212.66 1059.77
   9   1  -5 1764.85 1577.62
   9  -1  -5 1067.40 1546.79
  -9  -1   5  290.20  387.57
  -9  -1   5  371.76  646.33
   9  -1  -4  723.91 1296.66
   9   1  -4  593.08 1508.13
  -9   1   4  746.43  508.29
  -9  -1   4 1205.18  486.81
   9  -1  -319277.12 2170.59
   9   1  -315370.57 2241.00
  -9   1   319084.29 1046.02
  -9  -1   319048.42 1017.37
   9   1  -2 2777.44 1132.56
   9  -1  -2 1206.87 1175.55
  -9   1   2 1201.69  497.85
  -9  -1   2 1967.51  487.93
   9  -1  -168945.73 4616.19
   9   1  -167015.30 4434.69
  -9   1   165745.43 3090.17
  -9  -1   169093.76 3159.13
   9  -1   0  359.09  912.97
   9   1   0  468.54  848.50
  -9   1   0  321.19  642.61
  -9  -1   0  138.45  614.88
   9   1   187226.53 5329.88
   9  -1   187237.71 5469.15
  -9   1  -186146.36 4759.90
  -9  -1  -185340.93 4215.05
   9  -1   2 2909.68 1073.09
   9   1   2 2415.13 1036.52
  -9   1  -2 3578.26  976.38
  -9  -1  -2 3160.62  751.06
   9   1   3  481.20  777.28
   9  -1   3 1546.08 1169.94
  -9   1  -3  867.45  605.24
  -9  -1  -3 1186.47  612.56
   9  -1   4  778.28  866.35
   9   1   4  634.80  789.74
  -9   1  -4 1755.54  681.38
  -9  -1  -4  729.65  670.57
   9   1   546406.89 2983.30
   9  -1   540161.04 2919.69
  -9   1  -541686.44 2632.52
  -9  -1  -544559.02 2565.85
   9  -1   6  576.70  801.31
   9   1   6 -679.01  694.36
  -9   1  -6  734.96  659.51
  -9  -1  -6  -50.77  614.80
   9  -1   717099.63 1766.39
   9   1   719104.56 1754.01
  -9   1  -717795.73 1593.03
  -9  -1  -717222.89 1435.86
   9  -1   8  355.99  811.06
   9   1   8  391.08  710.40
  -9   1  -8  119.69  692.89
  -9  -1  -8  190.18  628.30
   9   1   9 4884.06 1435.46
   9  -1   9 1385.23 1156.04
  -9   1  -9 6052.67 1076.41
  -9  -1  -9 4767.90  969.24
   9  -1  10  267.24  984.67
   9   1  10 -190.09  801.67
  -9   1 -10  867.54  811.33
  -9  -1 -10  865.98  474.31
   9   1  11 1211.74  931.37
   9  -1  11  175.22 1046.49
  -9   1 -11 1119.03  799.81
  -9  -1 -11  460.84  754.39
   9  -1  12 -249.57  990.43
   9   1  12 -247.91 1225.43
  -9   1 -12  916.42  736.62
  -9  -1 -12 -398.09  688.78
   9   1  1310258.79 1707.42
   9  -1  1310645.59 1982.01
  -9   1 -1311315.94 1448.43
  -9  -1 -1312058.10 1460.30
   9  -1  14  790.80 1123.44
   9   1  14  405.15 1033.62
  -9   1 -14 1141.84  849.27
  -9  -1 -14 -807.08  773.52
   9   1  1515304.07 3414.14
   9  -1  1519483.63 2805.97
  -9   1 -1525577.48 2331.61
  -9  -1 -1525044.70 2183.45
  -9   3  17 2622.90  780.03
  -9   3  16 2446.56 1414.03
  -9  -3  16 4616.53 1350.95
  -9   3  15 3540.70 1488.75
  -9  -3  15 5296.47 1343.11
  -9   3  14  543.18 1234.26
  -9  -3  14 1699.51 1083.47
  -9   3  1320720.11 2576.44
  -9  -3  1320461.58 2070.41
  -9   3  12  872.68 1139.19
  -9  -3  12 -926.95  936.66
  -9   3  11 5186.53 1691.61
  -9  -3  11 5327.13 1340.48
  -9   3  10 3678.06 1658.33
  -9  -3  10 3604.54 1321.83
  -9  -3   998988.13 6389.64
  -9   3   992659.51 5812.13
  -9   3   8 -107.84 1327.31
  -9  -3   8  532.21  961.87
   9  -3  -7 -637.98 1932.60
  -9  -3   7  646.34  871.35
   9  -3  -6 2011.28 2123.99
  -9  -3   6 4038.93  417.66
  -9  -3   6 2077.43 1234.11
   9  -3  -5  854.69 1238.51
  -9  -3   5  189.73  309.90
  -9  -3   5  107.77  909.77
   9  -3  -4  179.98 1226.08
  -9  -3   4 1720.33  548.32
  -9  -3   4  149.12  945.12
   9   3  -3 1172.46 1505.52
   9  -3  -3  634.02 1160.29
  -9   3   3 1043.56  454.91
  -9  -3   3 1881.34  420.22
   9  -3  -2 6352.40 1415.13
   9   3  -2 4413.00 1734.88
  -9   3   2 4680.55  878.62
  -9  -3   2 6099.32  651.96
   9  -3  -1  396.34 1019.02
   9   3  -1 1370.74 1428.59
  -9   3   1 1529.29  735.92
  -9  -3   1 1231.49  481.21
   9   3   0 1430.70  903.49
   9  -3   0 1841.84 1016.83
  -9   3   0 1101.21  570.36
  -9  -3   0  710.19  487.34
   9  -3   124770.26 2343.61
   9   3   124316.24 1927.97
  -9   3  -125101.93 1978.67
  -9  -3  -124845.13 1434.48
   9  -3   2  -97.09  879.02
   9   3   2   79.65  639.87
  -9   3  -2   65.69  574.59
  -9  -3  -2  262.56  470.09
   9  -3   3  423.90  897.15
   9   3   3  377.05  935.95
  -9   3  -3  556.77  674.90
  -9  -3  -3  702.99  570.24
   9  -3   4 -142.54  762.06
   9   3   4  120.70  772.36
  -9   3  -4  169.17  595.54
  -9  -3  -4 -136.87  516.87
   9  -3   513197.11 1744.49
   9   3   512824.85 1629.91
  -9   3  -513679.79 1361.62
  -9  -3  -515246.62 1241.03
   9  -3   6  477.41  945.14
   9   3   6  697.06  885.50
  -9   3  -6  685.14  772.04
  -9  -3  -6  490.22  616.70
   9  -3   7  214.04  850.35
   9   3   7  -40.90  613.47
  -9   3  -7 -980.90  734.55
  -9  -3  -7 -265.32  593.94
   9   3   8  338.02  649.30
   9  -3   8  437.97  871.63
  -9   3  -8  657.52  788.41
  -9  -3  -8  176.62  635.67
   9  -3   9 3144.56 1530.07
   9   3   9 8341.51 1107.18
  -9   3  -912746.05 1414.56
  -9  -3  -912304.41 1207.78
   9   3  10  363.96  826.21
   9  -3  10   78.59  958.81
  -9   3 -10  158.91  771.50
  -9  -3 -10  -53.40  637.63
   9  -3  1114778.06 1908.27
   9   3  1111321.81 1657.27
  -9   3 -1110962.42 1503.78
  -9  -3 -1110961.00 1284.34
   9  -3  12-1603.72 1051.25
   9   3  12  432.96 1000.94
  -9   3 -12 -342.09  791.58
  -9  -3 -12  382.46  666.20
   9  -3  1323281.07 2738.40
  -9   3 -1325627.30 2330.31
  -9  -3 -1324525.10 1985.49
   9  -3  14  804.41 1337.16
  -9   3 -14  139.74  972.57
  -9  -3 -14 1941.58  859.66
   9  -3  15 -475.78 1188.85
  -9   3 -15  876.30  897.17
  -9  -3 -15  -22.06  760.95
  -9  -5  17  181.42  922.59
  -9   5  1611307.61 1874.17
  -9  -5  16 6791.66 1668.13
  -9   5  15 5173.00 1436.01
  -9  -5  15 1650.54 1178.72
  -9   5  14-2092.27 1100.51
  -9  -5  14 1336.84  831.13
  -9   5  13 -375.80 1162.13
  -9  -5  13  784.94  843.03
  -9   5  12  831.10 1068.47
  -9  -5  12 -147.45  816.66
  -9   5  11 1584.40  735.49
  -9  -5  11 -993.06  789.31
  -9   5  10 -932.85 1320.45
  -9  -5  10 -165.98  727.01
  -9  -5   913776.60 1456.89
  -9   5   910309.86 2331.22
   9  -5  -8 5047.83 2961.71
  -9  -5   8 9356.97 1311.48
   9  -5  -710606.72 2935.16
  -9  -5   713641.38 1744.99
   9  -5  -6   80.85 1348.07
  -9  -5   6  895.59  699.71
  -9  -5   6  179.79  347.52
   9  -5  -5 7708.93 2117.38
  -9  -5   5 9730.60 1117.76
  -9  -5   510625.51  937.71
   9  -5  -4   78.43 1277.82
  -9  -5   4  477.37  754.51
  -9  -5   4 1129.16  454.97
   9  -5  -3 2053.17  750.46
  -9   5   3 1227.64  563.32
  -9  -5   3 1363.35  487.21
  -9  -5   3 3758.85 1162.97
   9  -5  -2  127.12 1047.84
  -9  -5   2  535.16  593.27
  -9   5   2  102.27  748.53
  -9  -5   2  143.78  974.03
   9  -5  -110100.58 1524.85
   9   5  -1 3246.00 1554.23
  -9   5   1 7557.59  930.41
  -9  -5   1 6701.24  751.73
   9   5   0 -293.90  943.27
   9  -5   0 2333.15 1031.78
  -9   5   0  443.77  637.97
  -9  -5   0  745.10  508.98
   9  -5   1 4696.85 1292.94
   9   5   1 1330.17 1392.55
  -9   5  -1 5538.19  932.34
  -9  -5  -1 5180.10  731.87
   9  -5   2  254.22 1041.77
   9   5   2 1152.89  749.24
  -9   5  -2 1270.78  793.22
  -9  -5  -2 2406.81  619.66
   9  -5   3 4932.16 1218.30
   9   5   3 2062.61 1041.34
  -9   5  -3 1913.37  905.51
  -9  -5  -3 3312.11  706.74
   9   5   4 1533.46  978.52
   9  -5   4 2240.65 1114.85
  -9   5  -4 2731.27  930.12
  -9  -5  -4 3605.44  753.52
   9  -5   5  908.69  981.77
   9   5   5  274.68  588.07
  -9   5  -5  922.63  799.25
  -9  -5  -5 1324.70  606.50
   9  -5   6 3191.82 1268.90
  -9   5  -6 4213.46 1047.89
  -9  -5  -6 3113.45  814.05
   9  -5   722512.76 2223.80
  -9   5  -722163.99 1969.25
  -9  -5  -723527.56 1649.18
   9  -5   8  852.78  939.20
  -9   5  -8  782.87  802.19
  -9  -5  -8 -145.09  633.00
   9  -5   9   86.68  946.48
  -9   5  -9  243.95  828.77
  -9  -5  -9  542.85  634.51
   9  -5  10  492.71  920.34
  -9   5 -10   77.77  790.00
  -9  -5 -10 -126.75  570.32
   9  -5  11 2320.81 1272.44
  -9  -5 -11  -26.81  797.42
  -9   5 -11 2503.24  988.63
   9  -5  12  931.13 1088.51
  -9   5 -12  775.57  923.08
  -9  -5 -12 -318.39  672.21
   9  -5  13 1954.78 1369.81
  -9   5 -13 3609.10 1133.28
  -9  -5 -13 1054.56  845.74
   9  -5  14  620.62 1220.92
  -9   5 -14  745.50  985.11
  -9  -5 -14  277.22  748.59
  -9   7  15 2159.36 1509.80
  -9  -7  15 2083.40  998.28
  -9  -7  14  162.08  772.11
  -9   7  14 -752.00 1221.84
  -9   7  13 3891.40 1439.27
  -9  -7  13 1066.68  948.09
  -9  -7  12  -32.29  770.08
  -9   7  12 2233.87 1351.74
  -9   7  11 2864.59 1655.55
  -9  -7  11 2080.73  836.69
  -9  -7  10 3784.84  891.44
  -9   7  10 6500.49 1882.22
  -9   7   9 5011.41 1252.42
  -9  -7   9 6653.06  942.72
   9  -7  -814162.53 3287.59
  -9  -7   810336.82 1425.47
   9  -7  -7 3744.21 1799.95
  -9  -7   7  306.02  553.28
   9  -7  -6 4770.22 1584.88
  -9  -7   6 1050.83  520.23
   9  -7  -5  459.19  766.57
  -9  -7   5  893.68  489.84
   9  -7  -4    0.79 1204.71
  -9  -7   4 1226.62  713.80
   9  -7  -3 8156.34 1832.54
  -9  -7   3 8939.64  856.83
   9  -7  -2 6602.88 1638.36
  -9  -7   2 6903.57  812.56
  -9   7   2 3068.58 1275.63
   9  -7  -1 2897.95 1242.98
  -9   7   1 1662.82  820.06
  -9  -7   1 3014.14  663.98
   9  -7   0 1980.68 1221.66
  -9   7   0 1586.44 1178.72
  -9  -7   0 2470.61  673.91
   9  -7   133129.04 2925.94
  -9   7  -135658.54 3087.64
  -9  -7  -135041.57 2040.91
   9  -7   218460.50 2216.48
  -9   7  -215888.28 1799.44
  -9  -7  -218061.11 1469.98
   9  -7   3 5903.16 1421.10
  -9   7  -3 3806.23 1237.00
  -9  -7  -3 6919.85  875.38
   9  -7   4 2836.75 1224.56
  -9  -7  -4 2652.55  808.87
  -9   7  -4 4777.43 1147.25
   9  -7   5 3005.33 1196.48
  -9   7  -5 1327.33 1009.60
  -9  -7  -5 2270.65  745.87
   9  -7   6 1165.76  852.55
  -9   7  -6 -140.32  794.85
  -9  -7  -6 -379.93  549.03
   9  -7   7  620.63  878.66
  -9   7  -7 -476.35  834.46
  -9  -7  -7  277.34  606.60
   9  -7   8  159.09 1094.90
  -9  -7  -8 2640.96  746.39
  -9   7  -8 1700.82 1054.82
   9  -7   9  981.70 1085.59
  -9   7  -9 2778.33  646.67
  -9  -7  -9 1014.27  733.65
   9  -7  10 2232.46 1118.65
  -9   7 -10 1331.95  610.09
  -9  -7 -10  852.25  684.56
   9  -7  11 1269.89 1046.14
  -9   7 -11  868.51  980.10
  -9  -7 -11   19.39  682.52
   9  -7  12   46.23  643.70
  -9   7 -12 1841.06  996.55
  -9  -7 -12  218.00  677.92
   9  -7  13  673.61 1328.02
  -9   7 -13 3648.30 1137.08
  -9  -7 -13 1168.41  782.03
  -9   9  14 -363.40 1146.50
  -9   9  13 -478.32 1261.26
  -9   9  12 1737.46 1562.95
  -9   9  11 8142.01 2238.68
  -9   9  10  595.46 1528.66
  -9   9   9 -377.07  861.38
   9  -9  -8 3242.40 2550.69
   9  -9  -7 -562.03 1759.50
  -9  -9   7  481.50  498.94
   9  -9  -6-4534.09 1517.74
  -9  -9   6 -170.13  779.51
   9  -9  -5 1467.34 1473.29
  -9  -9   5 1827.21  652.22
   9  -9  -4 4041.78 1761.08
  -9  -9   4 7305.25  930.11
   9  -9  -3 1793.47 1341.33
  -9  -9   3  994.64  631.43
   9  -9  -213504.72 1436.83
  -9  -9   214332.67 1607.82
   9  -9  -1  151.76 1312.40
  -9  -9   1 4021.72  750.41
  -9   9   1 1902.41  897.24
   9  -9   0 -625.00 1005.53
  -9   9   0 -834.96 1013.29
  -9  -9   0  162.92  575.99
  -9   9  -110485.67 1412.85
  -9  -9  -110836.27 1138.04
   9  -9   214961.95 1395.59
  -9   9  -213427.63 1834.43
  -9  -9  -218527.76 1565.06
   9  -9   3   82.95 1065.15
  -9  -9  -3 1880.99  714.20
  -9   9  -3   82.22  961.81
   9  -9   4 7591.96 1726.55
  -9   9  -4 6841.01 1648.82
  -9  -9  -412441.86 1258.73
   9  -9   5 1172.16  979.97
  -9   9  -5 -367.49  976.07
  -9  -9  -5  855.62  653.11
   9  -9   6  219.35  529.18
  -9   9  -6  700.59  923.03
  -9  -9  -6 -971.96  600.06
   9  -9   712128.04 1902.01
  -9  -9  -715082.49 1374.59
  -9   9  -713024.21 1877.84
   9  -9   8  795.41  569.18
  -9   9  -8  233.13 1026.72
  -9  -9  -8  294.77  653.53
   9  -9   9 2063.60 1173.49
  -9   9  -9 2161.94 1225.48
  -9  -9  -9 2661.49  507.02
   9  -9  10  -42.59 1076.42
  -9   9 -10  181.42 1164.06
  -9  -9 -10 1881.62  470.88
   9  -9  11 -451.18  980.33
  -9  -9 -11  -87.66  393.81
  -9   9 -11-2336.81 1043.29
  -9   9 -12 1242.50 1182.92
  -9  11  12 3359.07 1675.13
  -9  11  1111531.47 2573.49
  -9  11  10 4924.81 2078.30
  -9  11   9  560.32  954.71
   9 -11  -8   29.63 1947.44
   9 -11  -7  863.38 2142.23
  -9 -11   7 2009.10  732.38
   9 -11  -6 5040.25 1650.62
  -9 -11   6  567.91  707.09
   9 -11  -5 5174.22 1934.17
  -9 -11   5 7314.08  978.33
   9 -11  -4 3584.86 1713.68
  -9 -11   4 3688.01  859.31
   9 -11  -3  436.05 1272.39
  -9 -11   3  419.37  631.27
   9 -11  -2 7324.46 1899.61
  -9 -11   2 9700.33 1224.43
   9 -11  -1 5437.47 1531.61
  -9 -11   1 3875.27  906.50
  -9  11   0 1296.05 1024.33
  -9 -11   0 4305.78  882.28
   9 -11   1 3321.14 1356.35
  -9  11  -1 2446.50 1054.47
  -9 -11  -1 3373.68  837.81
   9 -11   2 4882.48 1417.02
  -9  11  -2 2143.08 1176.43
  -9 -11  -2 3782.86  928.66
   9 -11   3 2332.12 1010.73
  -9  11  -3 -510.15  935.19
  -9 -11  -3  363.49  691.41
   9 -11   4-1407.25  977.22
  -9 -11  -4 1046.56  668.17
  -9  11  -4  235.45  929.52
   9 -11   5  339.73 1000.29
  -9  11  -5   63.86 1038.86
  -9 -11  -5 1014.20  728.92
   9 -11   6  149.90  625.47
  -9  11  -6  983.94 1106.70
  -9 -11  -6 1750.37  738.91
   9 -11   7 3454.50  944.07
  -9  11  -7 5858.92 1575.95
  -9 -11  -7 8531.38 1065.09
   9 -11   8  615.71 1174.01
  -9  11  -8 1494.18 1200.35
  -9 -11  -8 1110.93  759.22
   9 -11   9 3426.80 1433.85
  -9  11  -9 8446.21 1659.27
  -9 -11  -9 6614.24 1105.23
   9 -13  -8 4519.25 2178.82
  -9 -13   8 -544.76  694.89
   9 -13  -7 5648.53 2818.65
  -9 -13   7 6425.21 1455.53
   9 -13  -6 3233.93 1864.07
  -9 -13   6 2120.21  898.04
   9 -13  -5  414.59 1801.18
  -9 -13   5 1996.10  829.73
   9 -13  -4 7714.88 2170.39
  -9 -13   4 7691.48 1209.37
   9 -13  -3 3848.05 1676.41
  -9 -13   3 3269.81  935.70
   9 -13  -2 2123.01 1490.57
  -9 -13   2 2057.80  870.84
   9 -13  -1 3374.42 1397.06
  -9 -13   1  492.65  785.97
   9 -13   0 1458.51 1167.80
  -9 -13   0  168.93  722.34
   9 -13   1 1000.75  650.98
  -9  13  -1  -35.75 1214.70
  -9 -13  -1  266.11  714.09
  -9  13  -2 1441.73 1009.68
  -9 -13  -2 1142.85  803.33
  -9  13  -3 1961.54 1407.89
  -9 -13  -3  222.69  764.64
   9 -13   4 -783.14  989.81
  -9  13  -4 1332.27  968.12
  -9 -13  -4  185.58  733.18
   9 -13   5 2634.13 1211.96
  -9  13  -5 2621.80 1174.40
  -9 -13  -5  631.01  844.10
   9 -13   6 -719.90  927.45
  -9  13  -6 1239.92  977.56
  -9 -13  -6 -114.03  678.05
 -10   0  15 -534.88 1195.59
 -10   0  1427285.86 2843.49
 -10   0  13  430.97 1157.27
 -10   0  12  -74.15 1174.11
 -10   0  11  821.43 1330.96
 -10   0  1031525.52 3085.70
 -10   0   9 -619.48 1316.44
 -10   0   847934.63 4373.07
 -10   0   7 -341.05 1295.16
 -10   0   622613.41 1864.78
  10   0  -5-3474.17 2117.82
  10   0  -4 3111.19 1939.46
  10   0  -3  227.78 1152.57
 -10   0   3 -189.00  512.94
  10   0  -2 1090.65 1281.46
 -10   0   2 2628.99  547.77
  10   0  -1  966.00 1068.53
 -10   0   1  574.18  485.82
  10   0   0107467.9 6842.51
 -10   0   0109882.4 5623.99
 -10   0  -1 -728.71  541.66
 -10   0  -210252.68 1015.57
  10   0   3  284.43  884.57
 -10   0  -3 -423.09  572.61
  10   0   4 -440.39  828.99
 -10   0  -4 -196.18  851.77
  10   0   5  776.86  761.05
 -10   0  -5 -191.16  607.56
  10   0   6 4407.75 1068.95
 -10   0  -6 3688.08  881.77
  10   0   7 -397.88  774.70
 -10   0  -7  104.54  636.47
  10   0   8 2128.76  982.63
 -10   0  -8 1172.78  856.57
  10   0   9  364.06  785.11
 -10   0  -9 -983.37  757.17
  10   0  1019883.50 1939.59
 -10   0 -1025156.87 2041.16
  10   0  11-1179.65  800.37
 -10   0 -11  556.72  781.00
  10   0  1215806.84 1936.34
 -10   0 -1218435.50 1850.41
  10   0  13 -365.32  914.27
 -10   0 -13  951.49  815.61
  10   0  14  907.16 1055.51
 -10  -2  16 2076.81 1514.55
 -10   2  16 7022.31 1715.29
 -10   2  15  489.02 1368.55
 -10  -2  15 1407.97 1139.80
 -10  -2  14 7225.90 1511.67
 -10   2  14 6424.04 1917.57
 -10   2  13  645.59 1532.26
 -10  -2  13 1230.64 1165.17
 -10   2  1210690.03 2343.99
 -10  -2  1216913.27 2135.64
 -10   2  11  625.54 1332.81
 -10  -2  11  763.88 1101.35
 -10  -2  1049323.14 4006.69
 -10   2  1044604.68 4343.99
 -10   2   9 6476.63 2092.11
 -10  -2   9 5644.80 1658.76
 -10  -2   8 1653.14 1167.14
 -10   2   8 1696.57 1556.82
 -10   2   7-1186.19  811.22
 -10  -2   7 1911.85 1539.88
  10  -2  -6 2353.19 2649.05
 -10  -2   6 7341.51 1696.79
  10  -2  -5 1503.32 1890.19
 -10  -2   5 1364.35 1283.71
  10  -2  -4 4098.14 1751.34
  10   2  -4 6693.51 2015.70
 -10  -2   4 3610.22  523.42
  10   2  -3 1291.60 1634.72
  10  -2  -3 1352.56 1430.96
 -10  -2   3 2461.67  516.36
  10   2  -228183.70 3688.78
  10  -2  -226870.83 2825.12
 -10   2   230706.30 1981.02
 -10  -2   229050.47 1551.57
  10  -2  -1  763.97 1142.49
 -10   2   1 1278.30  594.98
 -10  -2   1 1325.29  703.48
  10  -2   0 3212.91 1209.73
 -10   2   0 3308.21  911.42
 -10  -2   0 3049.20  635.13
  10   2   1 -264.63  869.82
  10  -2   1 -314.81  995.94
 -10   2  -1  812.91  563.73
 -10  -2  -1  368.34  517.46
  10  -2   216488.14 2020.39
  10   2   216977.98 1738.51
 -10   2  -217914.28 1408.07
 -10  -2  -219838.79 1366.76
  10  -2   3 -434.73  869.28
  10   2   3 -288.85  779.74
 -10   2  -3  904.69  606.74
 -10  -2  -3  206.93  535.05
  10  -2   4 1949.36 1088.31
  10   2   4 3141.97  949.15
 -10   2  -4 1805.57  802.46
 -10  -2  -4 3147.67  752.41
  10   2   5  343.35  950.94
  10  -2   5 -392.44  758.16
 -10   2  -5  -60.82  579.71
 -10  -2  -5  166.23  566.05
  10  -2   621189.65 2108.33
  10   2   621237.05 1813.71
 -10   2  -623730.78 1851.69
 -10  -2  -621274.77 1688.48
  10  -2   7 -466.19  916.92
  10   2   7 1480.32  998.69
 -10   2  -7  380.85  734.93
 -10  -2  -7  641.49  674.00
  10  -2   8 1629.72 1151.57
  10   2   8 3229.90  910.07
 -10   2  -8 1801.00  911.96
 -10  -2  -8 2429.85  513.89
  10  -2   9 1010.81  902.79
  10   2   9  555.82  751.36
 -10   2  -9  851.55  834.58
 -10  -2  -9  -91.44  699.80
  10  -2  10  580.04  919.41
  10   2  10  215.09  690.57
 -10   2 -10  536.00  836.32
 -10  -2 -10  105.41  701.18
  10  -2  11-1247.92  898.15
  10   2  11 -586.41  720.73
 -10   2 -11  167.55  838.94
 -10  -2 -11  143.75  715.92
  10  -2  12 3948.82 1229.30
  10   2  12 3096.55  982.71
 -10   2 -12 5146.58 1202.54
 -10  -2 -12 3632.31 1014.33
  10  -2  13  -31.30 1009.48
 -10   2 -13  710.62  938.96
 -10  -2 -13  392.11  778.08
 -10  -4  15 3990.24 1206.21
 -10   4  15  826.97 1522.55
 -10   4  14 6175.26 1936.81
 -10  -4  14 4483.22 1352.64
 -10  -4  13 1024.79  993.26
 -10   4  13  675.48 1320.17
 -10   4  12 4293.30 1619.74
 -10  -4  12 3399.46 1177.82
 -10  -4  11 5339.09 1411.59
 -10   4  11 4724.83 1886.21
 -10   4  1013311.09 2471.26
 -10  -4  1010505.79 1590.08
 -10  -4   9 1300.93 1017.27
 -10   4   9 1270.62 1618.56
 -10   4   8  834.77  884.45
 -10  -4   8  460.89  967.93
  10  -4  -7 -768.61 1983.79
 -10  -4   7  515.02  862.34
  10  -4  -614476.99 3317.28
 -10  -4   617161.39 1706.07
  10  -4  -5  700.49 1901.77
 -10  -4   5 4608.88 1109.52
  10  -4  -4 1976.37 1511.82
 -10  -4   4 3910.93  717.31
 -10  -4   4 2456.76 1095.69
  10  -4  -3 -646.91 1050.01
 -10  -4   3 -454.82  782.56
 -10  -4   3  369.26  405.69
  10  -4  -227531.71 2844.88
  10   4  -224407.16 3098.99
 -10   4   227472.43 1740.48
 -10  -4   227606.21 1535.33
  10  -4  -1 -872.13 1002.11
  10   4  -1 -384.27 1060.19
 -10   4   1   37.50  518.28
 -10  -4   1  109.32  435.18
  10  -4   0 3749.69 1188.57
  10   4   0 1358.77 1083.00
 -10   4   0 1888.88  683.40
 -10  -4   0 1665.71  588.48
  10   4   1 1151.19 1072.22
  10  -4   1 3719.94 1339.80
 -10   4  -1 4881.58  861.36
 -10  -4  -1 5293.20  762.86
  10  -4   2 1397.59 1145.82
  10   4   2 1991.20  898.78
 -10   4  -2 2362.47  789.08
 -10  -4  -2 2809.61  669.68
  10  -4   3 2301.74 1014.23
  10   4   3 -202.03  741.36
 -10   4  -3  327.14  673.48
 -10  -4  -3  448.61  557.43
  10  -4   4 -555.66  877.50
  10   4   4  435.39  613.95
 -10   4  -4  111.29  630.16
 -10  -4  -4 -132.96  536.25
  10  -4   5 -370.74  520.27
  10   4   5  368.70  657.29
 -10   4  -5 1274.94  719.18
 -10  -4  -5  202.34  588.27
  10  -4   6  407.62  907.60
 -10   4  -6  590.69  732.33
 -10  -4  -6  -79.06  580.84
  10  -4   7 1294.52 1173.23
 -10   4  -7 1412.62  925.72
 -10  -4  -7 2609.39  788.08
  10  -4   8 1417.64 1087.53
 -10   4  -8 1882.88  876.11
 -10  -4  -8  353.83  712.94
  10  -4   9 1743.74 1002.03
 -10   4  -9 1695.55  882.57
 -10  -4  -9 -115.11  723.66
  10  -4  10   75.54  952.26
 -10   4 -10 -555.40  840.68
 -10  -4 -10 -416.02  669.42
  10  -4  11 1074.42 1005.82
 -10   4 -11  -59.57  912.04
 -10  -4 -11  886.35  736.47
  10  -4  12-2230.89  962.47
 -10   4 -12  147.74  876.78
 -10  -4 -12  636.70  686.76
  10  -4  13 1378.62 1074.35
 -10   4 -13  200.84  949.67
 -10  -4 -13  205.15  745.51
 -10   6  14 1297.89 1342.86
 -10  -6  14  139.69  915.58
 -10   6  13-1164.52 1154.46
 -10  -6  13 1024.23  850.67
 -10   6  12 -177.22 1306.03
 -10  -6  12  934.43  823.13
 -10   6  11 2792.30 1771.25
 -10  -6  11 4144.33 1074.10
 -10   6  10  938.89 1598.68
 -10  -6  10 1803.64  865.20
 -10   6   9 6103.87 2210.22
 -10  -6   910727.32 1287.70
  10  -6  -8 4583.32 2827.36
 -10  -6   8 6368.21 1431.60
  10  -6  -7 2159.11 1251.71
  10  -6  -6  121.64 1385.21
  10  -6  -5   90.47 1314.60
 -10  -6   5 -113.32  402.65
  10  -6  -4 2518.92 1501.79
 -10  -6   4 2015.41  568.61
  10  -6  -3 1032.02 1226.12
 -10  -6   3  564.93  482.97
  10  -6  -2 9388.60 1798.20
 -10  -6   2 8277.12  844.97
  10  -6  -1 6318.71 1291.08
 -10   6   1  538.48  787.95
 -10  -6   1 1673.10  633.82
  10  -6   0 6381.19 1544.21
 -10   6   0 3814.03  972.97
 -10  -6   0 5015.23 1049.99
  10  -6   121299.35 2691.38
 -10   6  -118559.02 1890.52
 -10  -6  -128364.24 1874.50
 -10  -6  -2 6084.32  880.01
 -10   6  -2 6748.50 1093.59
 -10   6  -3 -523.50  792.09
 -10  -6  -3 1231.98  626.44
  10  -6   4 1031.01  976.54
 -10   6  -4 -558.97  809.52
 -10  -6  -4 1076.27  630.30
  10  -6   5  843.25 1119.94
 -10   6  -5 1061.11  967.99
 -10  -6  -5 3719.42  778.65
  10  -6   6 3054.87 1236.71
 -10  -6  -6 3735.85  843.32
 -10   6  -6 3125.26 1109.84
  10  -6   7 2669.74 1139.98
 -10   6  -7 1658.33 1002.27
 -10  -6  -7  633.94  720.53
  10  -6   8 5199.58 1517.25
 -10   6  -8 5253.20 1322.72
 -10  -6  -8 6320.12  649.45
  10  -6   9 4778.30 1475.23
 -10   6  -9 8629.31 1480.08
  10  -6  10 4653.49 1194.39
 -10   6 -10 3958.09 1131.31
 -10  -6 -10 -236.78  836.70
  10  -6  11 1406.16  973.29
 -10   6 -11 1591.22  962.49
 -10  -6 -11 -978.87  665.86
  10  -6  12 2601.39 1116.07
 -10   6 -12  991.42 1060.11
 -10  -6 -12  246.62  741.56
 -10   8  13 3284.66 1720.90
 -10   8  12 1379.30 1592.58
 -10   8  11 1408.64 1710.54
 -10   8  10 6347.11 2112.16
 -10   8   9 1661.01  972.79
  10  -8  -822220.51 4231.20
  10  -8  -7 1593.88 2036.79
  10  -8  -6 3632.56 1842.71
  10  -8  -5 2459.90 1337.75
 -10  -8   5  171.98  717.91
  10  -8  -4 -241.55 1255.14
 -10  -8   4  302.99  485.25
  10  -8  -3 3935.68 1839.32
 -10  -8   3 7368.99  884.37
  10  -8  -2 2606.22 1393.90
 -10  -8   2 2603.23  716.00
  10  -8  -1  926.29 1110.37
 -10  -8   1  229.61  583.33
  10  -8   0 2938.69 1147.91
 -10   8   0 -208.37  776.58
 -10  -8   0  324.82  589.61
 -10   8  -1 1998.04 1012.80
 -10  -8  -1 2585.77  773.81
 -10   8  -2 1048.10  896.74
 -10  -8  -2  735.46  646.46
  10  -8   3 1584.70 1455.80
 -10   8  -3 3924.62 1226.93
 -10  -8  -3 7656.24  958.13
  10  -8   4 8133.63 1633.31
 -10  -8  -411258.93 1167.43
 -10   8  -4 7842.84 1500.58
  10  -8   5 2240.51  958.14
 -10   8  -5  845.18  900.50
 -10  -8  -5 -581.61  644.31
  10  -8   6 1674.00 1059.72
 -10   8  -6  846.58 1103.41
 -10  -8  -6 2494.90  774.05
  10  -8   7 3620.07 1230.67
 -10   8  -7 1637.32 1235.04
 -10  -8  -7 3085.89  860.47
  10  -8   8 2846.10 1202.32
 -10  -8  -8 1870.59  793.35
 -10   8  -8  473.63 1113.99
  10  -8   9 6381.21 1679.13
 -10   8  -9 5364.08 1617.04
 -10  -8  -9 7539.51 1129.63
  10  -8  10 -518.13  983.91
 -10   8 -10  613.73  993.97
 -10  -8 -10 -438.68  660.93
 -10  10  11  730.77 1734.44
 -10  10  10 5477.11 2235.56
 -10  10   9 2208.10 1118.11
  10 -10  -8 6279.04 3037.33
  10 -10  -7 5908.60 2719.52
  10 -10  -6-3338.20 1453.19
 -10 -10   6  196.96  555.93
  10 -10  -5 1849.88 1403.35
 -10 -10   5  622.35  592.66
  10 -10  -4 5350.32 1724.85
 -10 -10   4 2588.67  790.31
  10 -10  -3  461.29 1353.04
 -10 -10   3  765.23  864.02
  10 -10  -2  492.00  714.47
 -10 -10   2  326.83  616.44
  10 -10  -1 -160.02 1177.70
 -10 -10   1  247.93  594.99
  10 -10   0 2052.08 1321.68
 -10 -10   0 1833.14  710.07
  10 -10   1 6725.06 1519.86
 -10  10  -1 3433.48 1184.94
 -10 -10  -1 3444.53  924.23
 -10  10  -2  362.52  846.32
 -10 -10  -2  152.86  648.86
  10 -10   3 1583.47 1205.03
 -10  10  -3 1813.86 1097.12
 -10 -10  -3 1376.28  813.28
  10 -10   4 1813.20 1177.79
 -10  10  -4 2704.78 1159.56
 -10 -10  -4 1619.71  809.55
  10 -10   5 2215.70 1200.74
 -10  10  -5 2320.31 1196.46
 -10 -10  -5 1320.53  832.25
  10 -10   6 1347.13 1140.06
 -10  10  -6 -248.56 1216.19
 -10 -10  -6 2161.19  501.39
  10 -10   7 1666.53 1445.42
 -10  10  -7 3911.73 1535.98
 -10 -10  -7 8118.05 1110.67
  10 -10   8  127.34  953.29
 -10  10  -8  219.41  988.88
 -10 -10  -8  -25.43  658.67
  10 -12  -7 1813.12 2307.72
  10 -12  -6-1796.38 1653.20
 -10 -12   6 1242.03  717.34
  10 -12  -5 1511.16 1753.48
 -10 -12   5 1082.77  750.67
  10 -12  -4 1583.55 1555.88
 -10 -12   4 1287.75  732.53
 -10 -12   3 1518.86  790.97
 -10 -12   2  594.63  674.40
  10 -12  -1 3766.94 1814.98
 -10 -12   1 5759.29 1000.46
 -10 -12   0  164.36  660.73
 -10 -12  -1 3879.35  945.62
 -10  12  -2  465.22  931.64
 -10 -12  -2  295.10  719.80
 -10  12  -3 -779.90 1003.32
 -10 -12  -3  901.31  467.42
  10 -12   4 2799.68 1405.02
 -10  12  -4 1815.71 1255.99
 -10 -12  -4 3311.45  982.29
 -11   1  14-1321.90 1349.24
 -11  -1  14  323.53 1200.19
 -11   1  13 -496.35 1434.36
 -11  -1  13  -10.72 1200.16
 -11   1  12 1539.53 1504.56
 -11  -1  12  113.96 1225.75
 -11   1  11 7475.60 2371.53
 -11  -1  1115361.56 2258.95
 -11  -1  10 2525.02 1433.48
 -11   1  10 1192.76 1706.32
 -11   1   911040.21 2447.02
 -11  -1   9 9852.95 2022.03
 -11   1   8  834.67 1514.98
 -11  -1   8  319.08 1261.89
 -11   1   730993.24 3733.61
 -11  -1   736824.29 3699.91
  11  -1  -6-3107.22 2170.46
 -11  -1   6-1470.04 1447.21
  11  -1  -5 3598.69 1772.42
 -11  -1   5  289.98  841.64
  11   1  -4  774.84 1922.74
  11  -1  -4 2252.43 1891.04
  11   1  -3 4620.02 2004.22
  11   1  -2 2453.18 1263.41
 -11  -1   2   42.57  460.82
  11   1  -119217.19 2319.89
  11  -1  -120008.86 2402.58
 -11   1   116042.62 1241.21
 -11  -1   120172.18 1306.87
  11  -1   0  471.31 1097.56
 -11   1   0  299.02  574.25
 -11  -1   0 1036.64  544.51
  11  -1   1 3783.05 1324.98
  11   1   1 2616.42 1180.91
 -11   1  -1 2980.10  774.19
 -11  -1  -1 2493.71  702.39
  11  -1   2  613.81  987.02
  11   1   2 1242.75  954.56
 -11   1  -2  273.38  603.33
 -11  -1  -2  -83.12  563.93
  11   1   3  214.71  837.25
  11  -1   3  780.71  894.44
 -11   1  -3  -66.53  576.88
 -11  -1  -3 -549.25  552.35
  11  -1   4  871.94  935.16
  11   1   4  964.09  906.73
 -11   1  -4  650.83  695.69
 -11  -1  -4   37.52  645.28
  11  -1   5 1006.50  991.10
  11   1   5  452.36  902.97
 -11   1  -5 1325.91  751.74
 -11  -1  -5  782.16  725.38
  11  -1   6  -16.51  941.25
  11   1   6  220.56  907.06
 -11   1  -6 1561.28  757.06
 -11  -1  -6  784.71  726.18
  11   1   7  418.73  987.46
  11  -1   7 2940.44 1064.73
 -11   1  -7 2202.01  912.25
 -11  -1  -7 3234.16  858.18
  11  -1   8 1480.13  921.07
  11   1   8 1634.83  845.17
 -11   1  -8   19.41  794.82
 -11  -1  -8    7.58  745.89
  11  -1   9 5733.72 1356.29
  11   1   9 6092.68 1265.38
 -11   1  -9 4830.03 1199.29
 -11  -1  -9 8315.69 1177.73
  11  -1  10  360.43  906.02
  11   1  10 1398.96  807.44
 -11   1 -10 -734.79  434.88
 -11  -1 -10 -328.30  737.22
  11   1  11 3156.12 1100.10
  11  -1  11 4900.06 1143.29
 -11   1 -11 1762.83 1074.86
 -11  -1 -11 2568.95 1071.38
 -11   3  14 -254.53 1746.54
 -11  -3  14  636.70 1091.98
 -11   3  13  611.79 1728.38
 -11  -3  13 1232.30 1118.50
 -11   3  12  329.89 1318.05
 -11  -3  12 -246.17  985.29
 -11   3  1112217.76 2821.62
 -11  -3  1116798.92 2160.99
 -11   3  10  994.44 1584.31
 -11  -3  10  -48.32  991.46
 -11   3   9 2751.95 1015.04
 -11  -3   9 -500.63 1219.18
 -11   3   8 2864.43 1720.52
 -11  -3   8 1118.89 1219.91
  11  -3  -711534.53 3965.19
 -11  -3   723697.40 2463.25
  11  -3  -6 -322.30 1765.57
 -11  -3   6  980.81 1440.98
  11  -3  -528660.38 4017.26
 -11  -3   523255.94 2559.90
  11  -3  -4 -121.91 1490.19
 -11  -3   4 1075.84 1085.84
  11  -3  -3 2710.27 1346.09
 -11  -3   3  220.10  621.38
  11   3  -2 2647.77 1421.92
  11  -3  -2  777.07 1295.98
 -11  -3   2  646.00  523.57
  11  -3  -1 5410.06 1705.13
  11   3  -1 5993.28 1630.33
 -11  -3   1 8278.21  833.54
  11  -3   0 -938.75 1107.87
  11   3   0  155.73 1045.99
 -11   3   0  496.79  558.46
 -11  -3   0  321.80  490.27
  11   3   1 3010.08 1702.95
 -11   3  -1 3805.54  823.22
 -11  -3  -1 3801.96  734.81
  11   3   2 -458.04  880.41
 -11   3  -2 -237.04  603.22
 -11  -3  -2 -177.53  542.20
  11  -3   3  -76.73 1065.19
  11   3   3 1454.49  889.42
 -11   3  -3  420.62  709.75
 -11  -3  -3  730.11  602.62
  11  -3   4 -203.36  934.39
  11   3   4-1009.25 1026.08
 -11   3  -4  491.01  654.74
 -11  -3  -4 -172.21  543.80
  11   3   5 9129.02 1388.99
  11  -3   5 6790.78 1592.64
 -11   3  -511276.51 1326.56
 -11  -3  -513455.53 1235.06
  11  -3   6 1149.69 1055.09
 -11   3  -6 1223.67  822.07
 -11  -3  -6  142.82  726.78
  11  -3   7 -803.10  867.42
 -11   3  -7 -210.77  728.83
 -11  -3  -7  752.49  647.21
  11  -3   8 2638.83  956.95
 -11   3  -8 -479.35  786.65
 -11  -3  -8 -251.48  689.62
  11  -3   9 -156.92  955.91
 -11  -3  -9  281.85  675.52
 -11   3  -9  165.15  789.89
  11  -3  10 1520.29 1020.16
 -11   3 -10  856.03  873.72
 -11  -3 -10 -387.92  719.72
  11  -3  11  262.38  908.66
 -11   3 -11 -298.20  811.60
 -11  -3 -11  256.99  709.50
 -11  -5  13  833.92  988.93
 -11   5  13  370.46 1379.38
 -11   5  12 -284.91 1484.54
 -11  -5  12 -747.88  952.80
 -11  -5  11 4537.57 1181.12
 -11   5  11 1274.93 1763.95
 -11   5  10 2338.84 1681.24
 -11  -5  10  644.72 1390.50
 -11   5   9 2202.66 1698.28
 -11  -5   9 1150.73  999.55
 -11  -5   8  743.33  880.64
 -11   5   8 -146.13  904.49
  11  -5  -7 8781.67 3318.16
  11  -5  -6 3109.92 2313.29
  11  -5  -5 9405.14 2536.54
  11  -5  -4 3476.71 1720.56
  11  -5  -3 -349.21 1359.50
 -11  -5   3  993.34  520.54
  11  -5  -2   54.83 1242.91
 -11  -5   2  559.94  493.48
  11  -5  -1 7396.57 1991.52
 -11  -5   112707.16 1033.13
  11  -5   0-2113.92 1010.09
 -11  -5   0 1058.48  686.47
  11  -5   1 2820.75 1268.67
 -11   5  -1 1922.59  812.28
 -11  -5  -1 1345.90  643.03
 -11   5  -2  728.66  747.24
 -11  -5  -2  657.69  603.14
  11  -5   3-1581.23  971.68
 -11   5  -3   95.72  731.30
 -11  -5  -3   -0.67  590.68
  11  -5   4 4133.87 1207.48
 -11   5  -4 1574.05  902.54
 -11  -5  -4  678.89  728.26
  11  -5   5  265.05 1046.83
 -11   5  -5  785.54  860.30
 -11  -5  -5 1029.94  696.44
  11  -5   6  188.08  974.34
 -11   5  -6 -552.26  784.48
 -11  -5  -6  -33.41  619.67
  11  -5   7 6831.26 1621.24
 -11   5  -7 9018.51 1431.53
 -11  -5  -710027.56 1160.57
  11  -5   8 1863.75 1165.82
 -11  -5  -8 1624.92  826.03
 -11   5  -8 2277.09 1061.55
  11  -5   9 1914.99 1038.82
 -11   5  -9-1567.75  902.49
 -11  -5  -9 -378.94  701.80
  11  -5  10  765.88  578.31
 -11   5 -10 -529.39  877.72
 -11  -5 -10 -585.07  704.20
 -11   7  1115493.81 1917.27
 -11   7  10 2521.72 1805.81
 -11   7   9 -136.92 1375.60
  11  -7  -8 -286.01 2042.44
  11  -7  -7 4639.51 2560.73
  11  -7  -6 -226.23 1772.55
  11  -7  -5 -361.99 1514.12
  11  -7  -4 -357.62 1316.86
  11  -7  -3 4049.24 1422.53
 -11  -7   3 1329.70  598.60
  11  -7  -2  746.59 1154.80
 -11  -7   2  -77.50  498.46
  11  -7  -1  287.89 1268.57
 -11  -7   1  760.12  598.91
  11  -7   012170.36 1467.66
 -11  -7   014437.82 1363.03
  11  -7   1-1021.01 1613.13
 -11   7  -1 4715.87 1471.81
 -11  -7  -1 6522.72  915.02
 -11   7  -2 -273.37  887.98
 -11  -7  -2 1720.81  694.06
 -11   7  -3 1894.01  960.50
 -11  -7  -3 1585.61  737.51
  11  -7   4  318.65  675.15
 -11   7  -4 1267.07  946.05
 -11  -7  -4 1208.96  728.48
  11  -7   5 1060.78 1190.55
 -11   7  -5 1082.87 1033.39
 -11  -7  -5 2422.78  776.34
  11  -7   6 3190.16 1470.39
 -11   7  -6 3805.13 1323.94
 -11  -7  -6 6479.26 1017.89
  11  -7   7 2018.27 1013.32
 -11   7  -7  197.62  921.89
 -11  -7  -7 -265.13  709.25
  11  -7   8 -319.62 1026.03
 -11   7  -8 1522.87  973.84
 -11  -7  -8  242.00  709.67
  11  -7   9  818.65 1054.53
 -11   7  -9  371.50  988.15
 -11  -7  -9  242.70  747.67
 -11   9   9  737.95  972.29
  11  -9  -8 2841.06 2663.28
  11  -9  -7 3411.79 2392.54
  11  -9  -6 -782.05 1589.64
 -11  -9   4 -127.73  524.65
  11  -9  -3 1284.76 1254.39
 -11  -9   3   91.07  572.69
  11  -9  -2 5370.25 1596.33
 -11  -9   2 1574.31  771.48
 -11  -9   1 1980.25  707.93
 -11  -9   0  573.02  626.67
 -11  -9  -1  -61.48  584.12
 -11  -9  -2  463.64  709.24
  11  -9   3 -263.75  997.16
 -11   9  -3  213.28  883.31
 -11  -9  -3 -252.89  651.43
  11  -9   4 3751.63 1156.77
 -11   9  -4-1992.10  985.99
 -11  -9  -4  977.06  715.55
  11  -9   5 3008.17 1315.50
 -11   9  -5 2064.84 1261.05
 -11  -9  -5 3911.90  920.83
  11  -9   6 3098.05 1504.34
 -11   9  -6 2651.67 1469.10
 -11  -9  -6 6494.19 1100.78
  11 -11  -5 1451.20 1846.92
  11 -11  -4 -177.75 1289.62
 -11 -11   4   38.03  559.73
 -11 -11   3 1113.91  684.05
 -11 -11   2 2149.87  819.43
 -11 -11   1  297.13  897.77
 -11 -11   0 2267.85  824.95
 -11 -11  -1  175.83  666.42
 -11 -11  -2 1764.93  860.87
 -12   0  12 -618.84 1577.52
 -12   0  11 -785.91 1485.97
 -12   0  1021559.53 3035.57
 -12   0   9 1215.87 1597.74
 -12   0   8 7553.99 2419.79
 -12   0   7  126.36 1424.37
 -12   0   6 6375.90 2211.79
  12   0  -5  322.95 1914.62
  12   0  -4 9851.12 2652.64
  12   0  -3-1416.98 1840.62
  12   0  -220430.31 2960.72
  12   0  -1 -266.85 1161.47
  12   0   017125.50 2294.27
  12   0   1 -274.82 1048.89
 -12   0  -1  158.48  576.08
  12   0   2 3404.32 1297.54
 -12   0  -2 1897.04  764.46
  12   0   3 1129.54 1307.87
 -12   0  -3 -328.23  625.25
  12   0   4 1024.19 1112.21
 -12   0  -4  823.76  746.58
  12   0   5  -44.24  942.70
 -12   0  -5 -356.58  686.20
  12   0   6 4244.03 1507.21
 -12   0  -610239.02 1260.45
  12   0   7  611.35 1238.90
 -12   0  -7 -151.35  689.22
  12   0   8 5457.00 1653.58
 -12   0  -8 2737.30 1061.07
  12   0   9 1545.64 1272.52
 -12   0  -9 -233.48  769.87
 -12   2  12  632.22 1912.31
 -12  -2  12  739.15 1319.98
 -12   2  11 -727.19 1807.52
 -12  -2  11 1813.18 1283.62
 -12   2  1027974.70 3980.34
 -12  -2  1025518.61 3153.04
 -12   2   9 2209.45 1952.79
 -12  -2   9  949.51 1364.71
 -12   2   8  191.40 1821.76
 -12  -2   8 2041.80 1336.69
 -12   2   7 2443.31 1944.41
 -12  -2   7 2394.62 1569.58
  12  -2  -6-1430.33 1978.11
 -12  -2   6  300.12 1305.49
  12  -2  -5 -549.35 1717.30
 -12  -2   5  589.16 1244.72
  12  -2  -4 -707.39 1795.24
 -12  -2   4  714.25  742.54
  12  -2  -3  549.07 1442.79
  12   2  -3  325.03 1749.21
  12  -2  -2 7371.41 1965.24
  12   2  -2 7481.83 2307.22
  12  -2  -1  588.63 1198.72
  12   2  -1  567.66 1790.17
  12  -2   017168.12 2473.27
 -12  -2   014701.59 1233.82
 -12  -2  -1 1176.32  897.90
 -12   2  -1  946.53  727.58
  12   2   2 3646.99 1751.74
 -12   2  -211410.23 1261.12
 -12  -2  -212017.18 1119.17
  12  -2   3 1097.12 1103.23
  12   2   3  995.12 1360.59
 -12   2  -3   -7.39  702.40
 -12  -2  -3  336.83  627.88
  12  -2   4 9863.40 1758.94
  12   2   4 5634.56 1610.48
 -12   2  -4 9425.09 1306.99
 -12  -2  -411124.19 1172.47
  12  -2   5   41.13 1092.62
  12   2   5 2556.53 1029.83
 -12   2  -5  722.96  835.50
 -12  -2  -5 1372.69  710.70
  12  -2   6 3774.54 1339.85
 -12   2  -6 3197.61 1064.21
 -12  -2  -6 4951.96  927.52
  12  -2   7 1160.82  872.44
 -12   2  -7 -477.42  718.78
 -12  -2  -7 -250.42  639.38
  12  -2   8 4617.14 1395.33
 -12   2  -8 4937.53 1202.33
 -12  -2  -8 4921.87 1077.04
  12  -2   9  834.05 1005.43
 -12   2  -9  994.18  892.50
 -12  -2  -9   70.37  789.48
 -12   4  11 2843.29 1896.43
 -12  -4  11 1461.38 1281.81
 -12   4  10 -435.55 1888.56
 -12  -4  10 2000.71 1209.74
 -12  -4   9  427.39 1075.10
 -12   4   9 1413.69 1791.64
 -12   4   825843.03 3683.94
 -12  -4   822230.60 2762.19
  12  -4  -7 1582.10 2558.20
  12  -4  -6  586.02 1972.58
  12  -4  -5  689.98 1984.19
  12  -4  -4-3328.10 1846.69
  12  -4  -1 1872.70 1261.03
 -12  -4   1  195.40  539.27
  12  -4   0 -598.13 1201.66
 -12  -4   0 -388.10  562.55
 -12  -4  -1  501.82  606.80
 -12   4  -2 3865.68 1322.98
 -12  -4  -2 3617.28  842.05
  12  -4   3 -917.47 1125.93
 -12   4  -3  344.15  747.63
 -12  -4  -3  794.27  628.07
  12  -4   4 4226.45 1465.41
 -12   4  -4 1982.50 1047.84
 -12  -4  -4 4329.39  859.92
  12  -4   5 3309.63 1269.50
 -12   4  -5 1315.16  959.82
 -12  -4  -5 1864.43  863.05
  12  -4   6 1517.02 1075.32
 -12  -4  -6  621.11  700.09
 -12   4  -6 -746.27  810.79
  12  -4   7  645.29 1068.62
 -12   4  -7  485.45  857.09
 -12  -4  -7  279.79  714.87
  12  -4   8 4065.50 1353.10
 -12   4  -8 2866.37 1108.51
 -12  -4  -8 1893.56  914.05
 -12   6   9  701.50 1634.49
 -12   6   8  137.59  905.50
  12  -6  -7 1354.33 2480.11
  12  -6  -4 1066.00 1663.31
  12  -6  -3  300.25 1364.21
 -12  -6   1 1720.42  698.96
 -12  -6   0 9846.36 1070.57
 -12  -6  -1 3112.45  808.12
 -12  -6  -2  683.99  663.07
 -12   6  -3  938.49 1217.05
 -12  -6  -3  926.44  729.77
  12  -6   4 8990.27 1730.24
 -12   6  -4 8672.53 1300.32
 -12  -6  -4 1991.94 1086.98
  12  -6   5 3198.30 1491.09
 -12   6  -5 3449.67 1202.41
 -12  -6  -5 2828.04  999.24
  12  -6   6  -51.01 1182.72
 -12   6  -6 3112.04 1041.31
 -12  -6  -6 1120.08  806.93
  12  -8  -6 1498.75 1308.39
  12  -8  -5 -875.96 1663.41
  12  -8  -4  629.32 1423.19
  12  -8  -3-2253.21  933.23
  12  -8  -2-1662.32 1475.75
 -12  -8   2 2503.79  683.60
 -12  -8   1 1815.12  712.25
 -12  -8   0  607.61  657.85
  12  -8   1 -378.98  791.25
 -12  -8  -1 2205.53  744.75
 -12  -8  -2  143.50  632.43
 -12  -8  -3  949.36  749.93
 -13   1   8  224.75 1805.30
 -13  -1   8  -22.66 1428.11
 -13   1   7 4247.26 2726.30
 -13  -1   7 8480.79 2388.58
 -13   1   6 -515.26 1747.80
 -13  -1   6 1746.62 1608.63
  13  -1  -5 7041.34 3322.80
 -13  -1   510466.87 2445.91
  13  -1  -4-3698.00 2148.91
 -13  -1   4-1960.29 1007.01
  13  -1  -3 2630.39 2273.08
  13   1  -3 3489.02 2441.48
  13   1  -2-2482.19 1988.29
  13   1  -1 4568.00 1857.20
  13  -1   0 3404.47 1677.17
  13   1   1 5460.43 1726.46
  13  -1   2  575.25 1252.65
  13   1   2  480.49 1199.01
 -13  -1  -2  566.53  665.54
  13  -1   3  666.44 1287.83
  13   1   3 1713.52 1248.69
 -13   1  -3 -540.50  770.68
 -13  -1  -3 1842.72  741.78
  13  -1   4 1451.05 1257.23
  13   1   4  856.38 1210.86
 -13   1  -4  855.34  849.38
 -13  -1  -4 1275.20  775.33
  13  -1   5 3390.44 1250.77
 -13  -1  -5 -157.16  760.93
 -13   1  -5  700.14  840.95
 -13   3   7 2389.46 1320.85
  13  -3  -6 2735.17 2675.55
  13  -3  -5 7135.11 2774.86
  13  -3  -4 1853.43 2213.27
 -13  -3  -2  741.49  958.25
  13  -3   312016.47 2279.47
 -13  -3  -315690.71 1478.02
  13  -3   4 1226.66 1275.07
 -13   3  -4  685.29  798.41
 -13  -3  -4  425.90  753.85
  13  -5  -5 2025.37 2391.27
  13  -5  -4  351.98 1697.15
  13  -5  -2-1047.76 1551.59
  13  -5  -1 1152.53  887.51
  13  -5   0 2112.80 1574.41
 -13  -5  -1  -23.52  578.97
  13  -5   2 -491.84 1329.70
 -13  -5  -2 1499.17  727.46
   0   0   0    0.00    0.00
;
_shelx_hkl_checksum   85259
